# Supplementary material
Source: PubMed Central journal article supplement (PMC5014909)
Supplement: NIHMS809973-supplement-3.pdf [file NIHMS809973-supplement-3.pdf]

# Trp53cor1 KO vs WT (Heart)

This file shows the wt-v-ko comparison for Trp53cor1.

Cuff overview:

```
## CuffSet instance with:  
## 2 samples  
## 26754 genes  
## 77524 isoforms  
## 0 TSS  
## 23066 CDS  
## 0 promoters  
## 0 splicing  
## 19954 relCDS
```

## QC

### Dispersion

Dispersion plot for genes in cuff: (Overdispersion can lead to inaccurate quants)

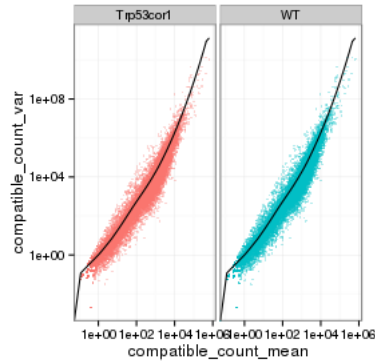

### Cross-replicate variability (fpkmSCVplot)

Differences in CV 2 can result in lower numbers of differentially expressed genes due to a higher degree of variability between replicate fpkm estimates.

Genes:

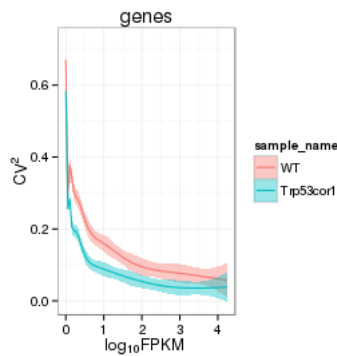

Isoforms:

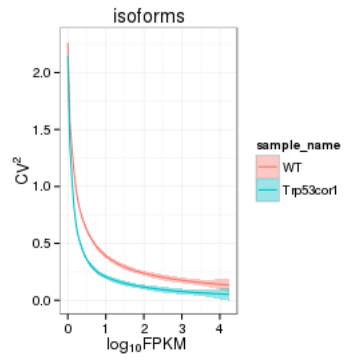

## MvA plot

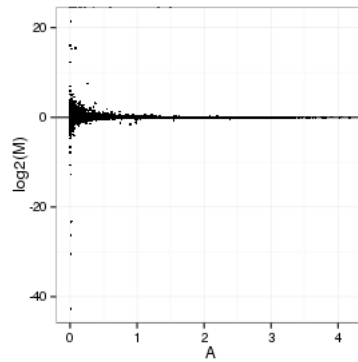

## MvA plot counts

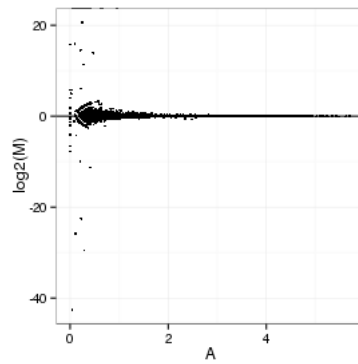

## Scatterplot matrix

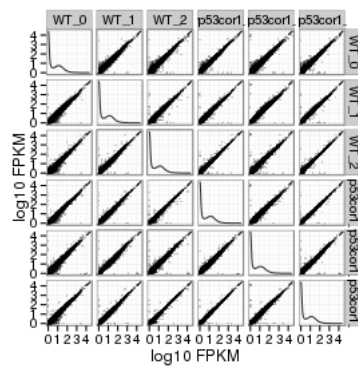

# Distributions

## Boxplots

Boxplot (genes)

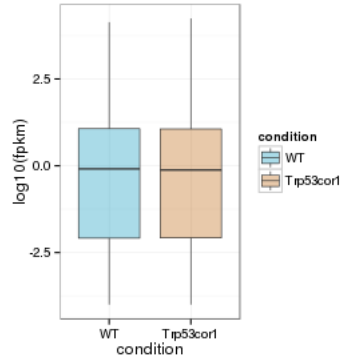

Boxplot (genes, replicates)

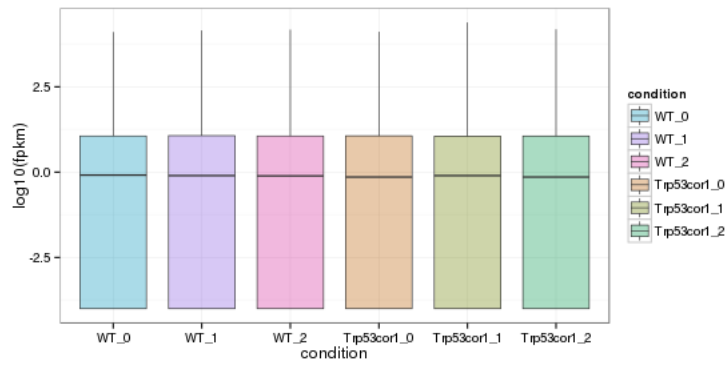

Boxplot (isoforms)

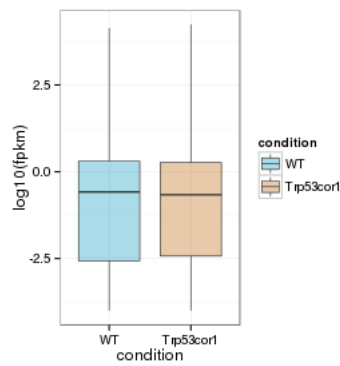

Boxplot (isoforms, replicates)

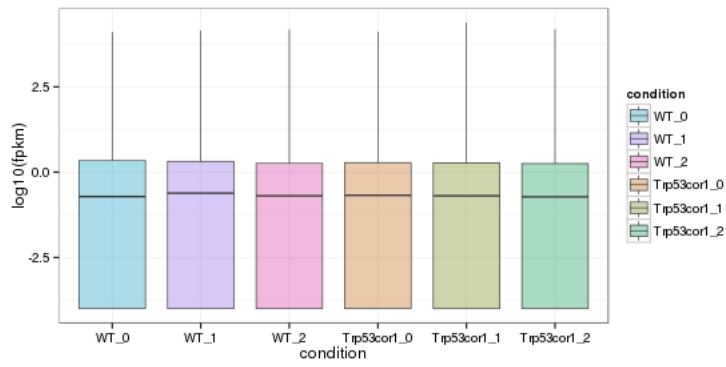

## Density

Density (genes)

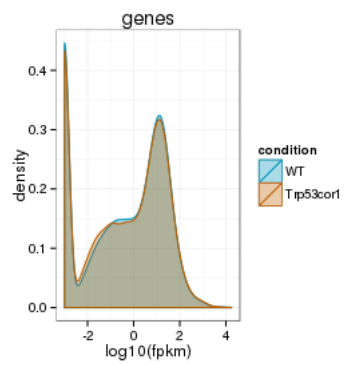

Density (genes, replicates)

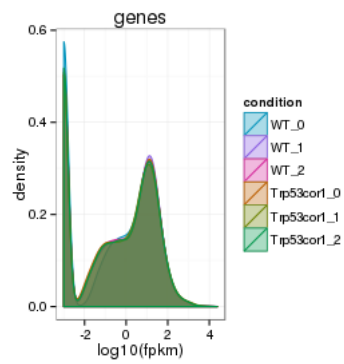

## Clustering

Replicate Clusters

### All genes(cuff)

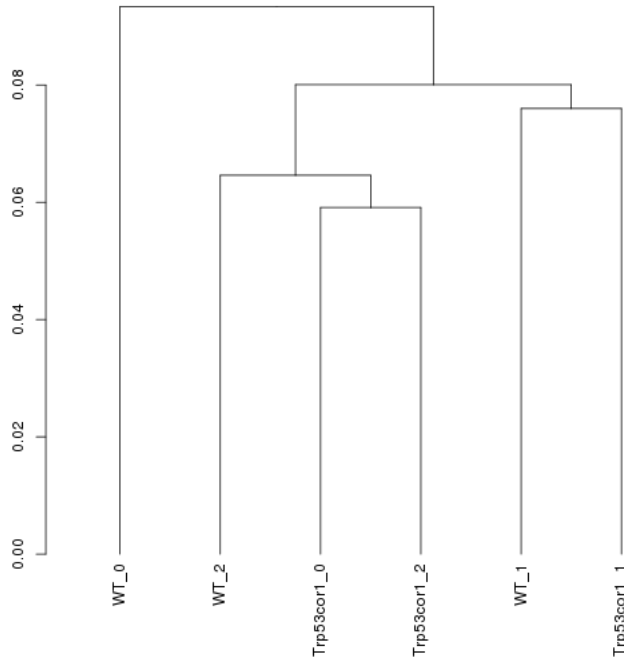

## NULL

### PCA (genes)

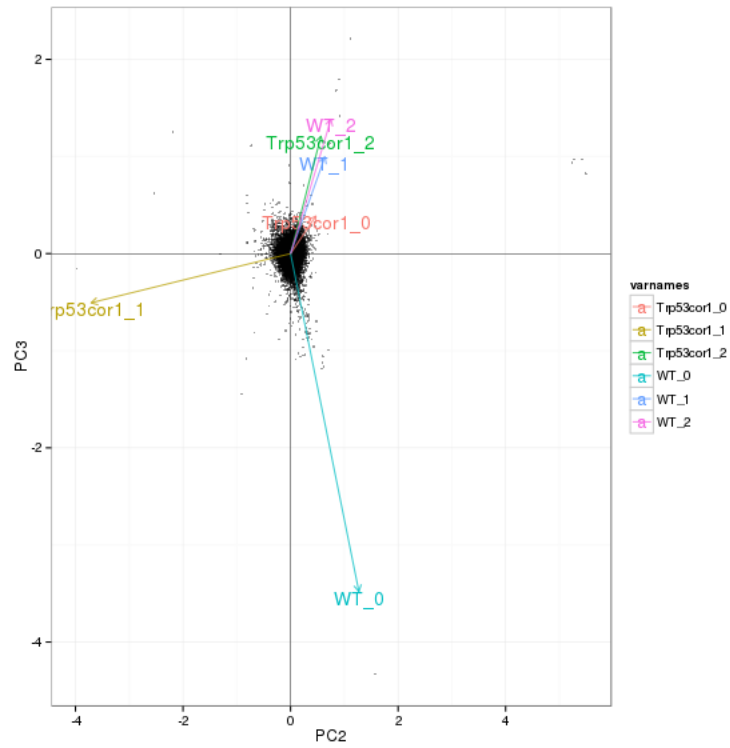

### MDS (genes)

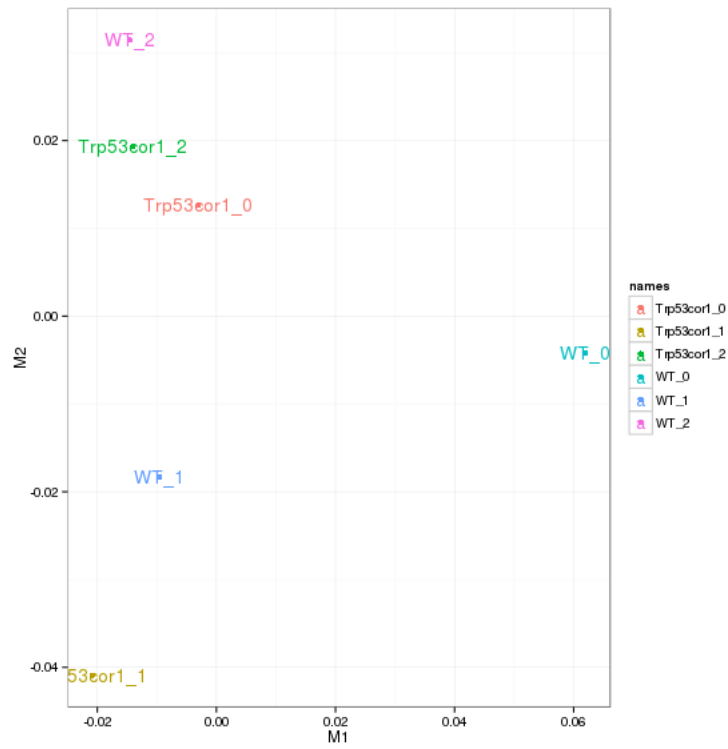

## KO assessment

### Endogenous lncRNA expression

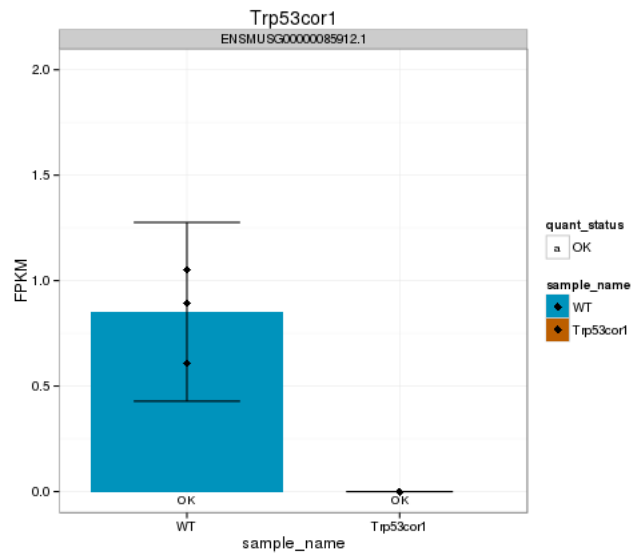

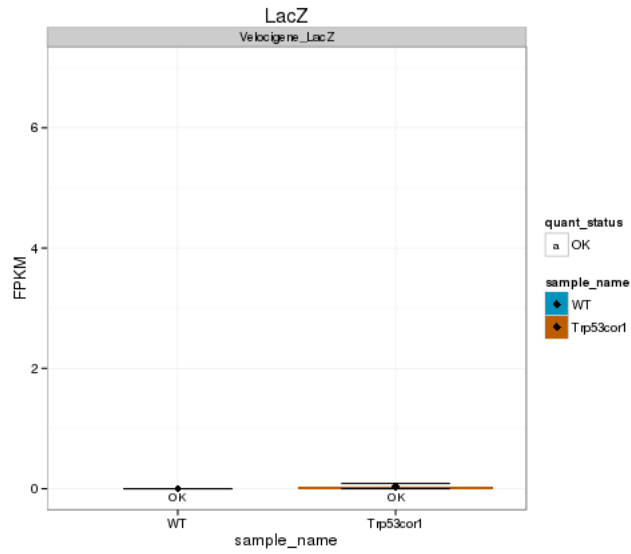

## Digital Genotyping (LacZ vs Endogenous lincRNA and Sex)

Eif2s3y is a y-expressed gene, Xist is an x-expressed gene Expression plot (endogenous linc, lacZ, Y-expressed gene):

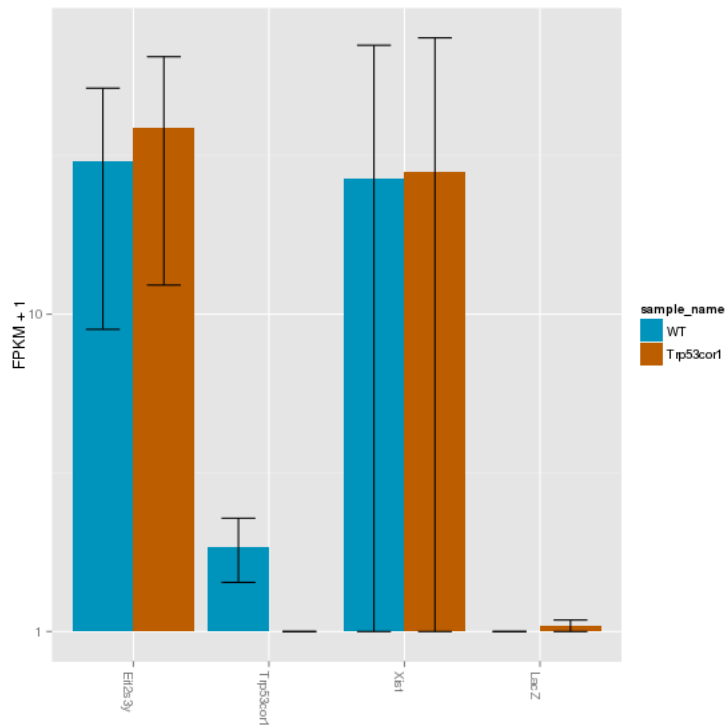

Expression heatmap:

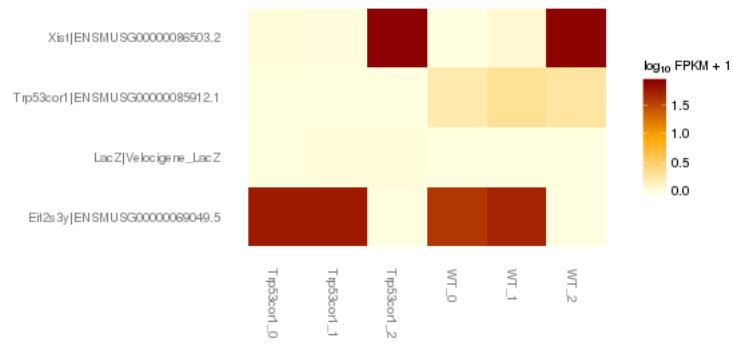

## Track visualization



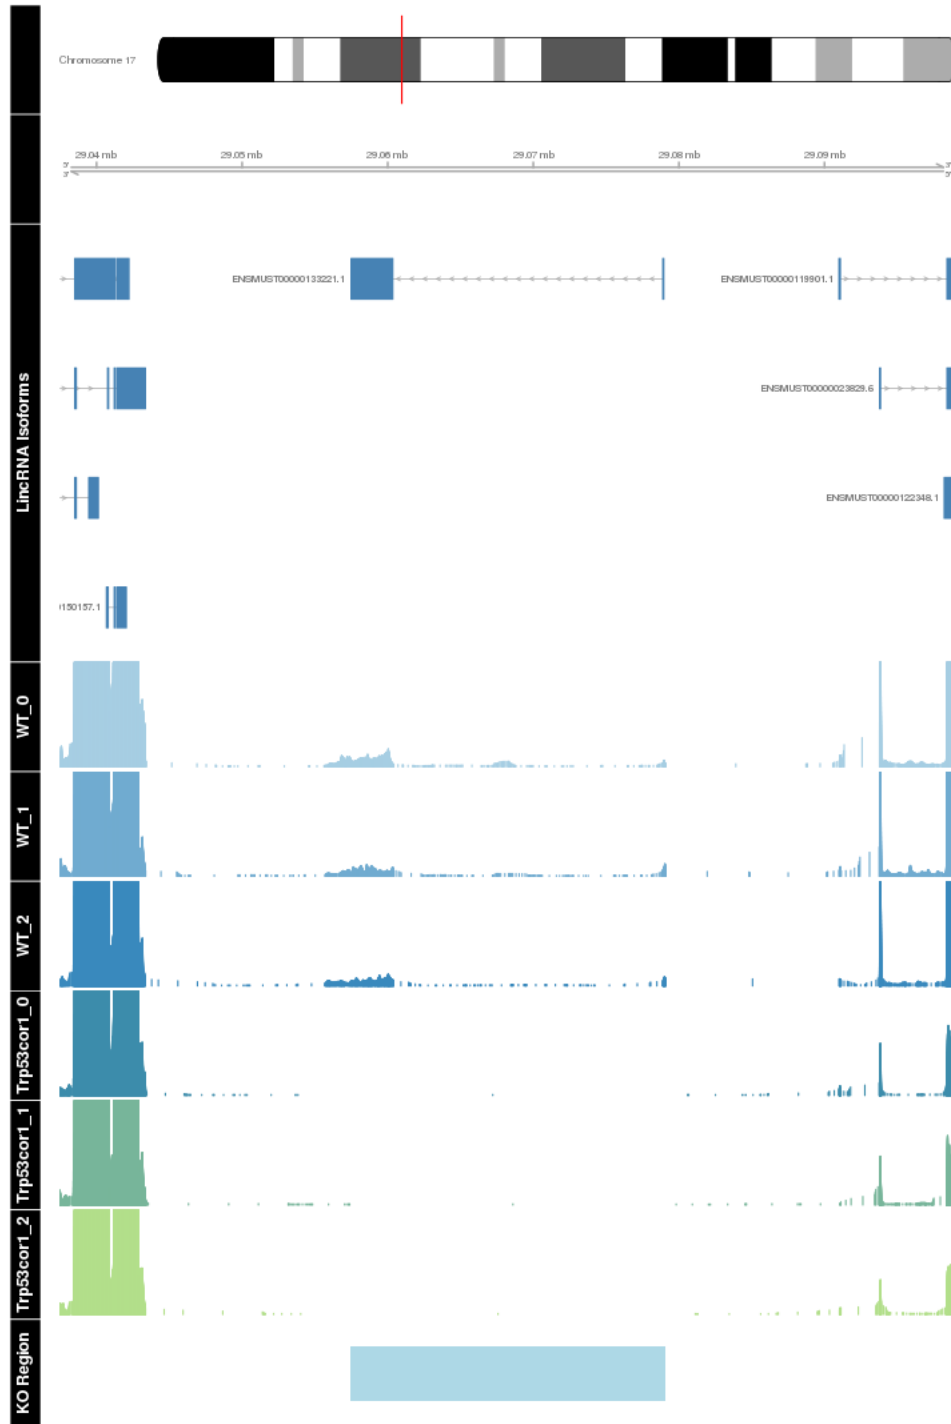

## Differential Analysis

### Differential Genes

There are 35 significantly differentially expressed genes. They are:

**geneAnnot\$Gene\_short\_name**

- 1 Slc4a1
- 2 Lama2
- 3 Fgf12
- 4 Cdkn1a
- 5 Glo1
- 6 Fbn1

- 7 Hemgn
- 8 Svep1
- 9 Spp1
- 10 Alb
- 11 Tnxb
- 12 Dnah8
- 13 Rxfp1
- 14 Rnps1
- 15 Fras1
- 16 Frem2
- 17 Abcc8
- 18 Hbb-bh1
- 19 Vsnl1
- 20 Afp
- 21 Uts2b
- 22 Fry
- 23 Ide
- 24 Dcpp3
- 25 Serpina6
- 26 Myl1
- 27 Npw
- 28 Hmga1-rs1
- 29 Trp53cor1
- 30 Rps2-ps10
- 31 Rhox5
- 32 Dcpp2
- 33 Gm9825
- 34 Dcpp1
- 35 Gm20594

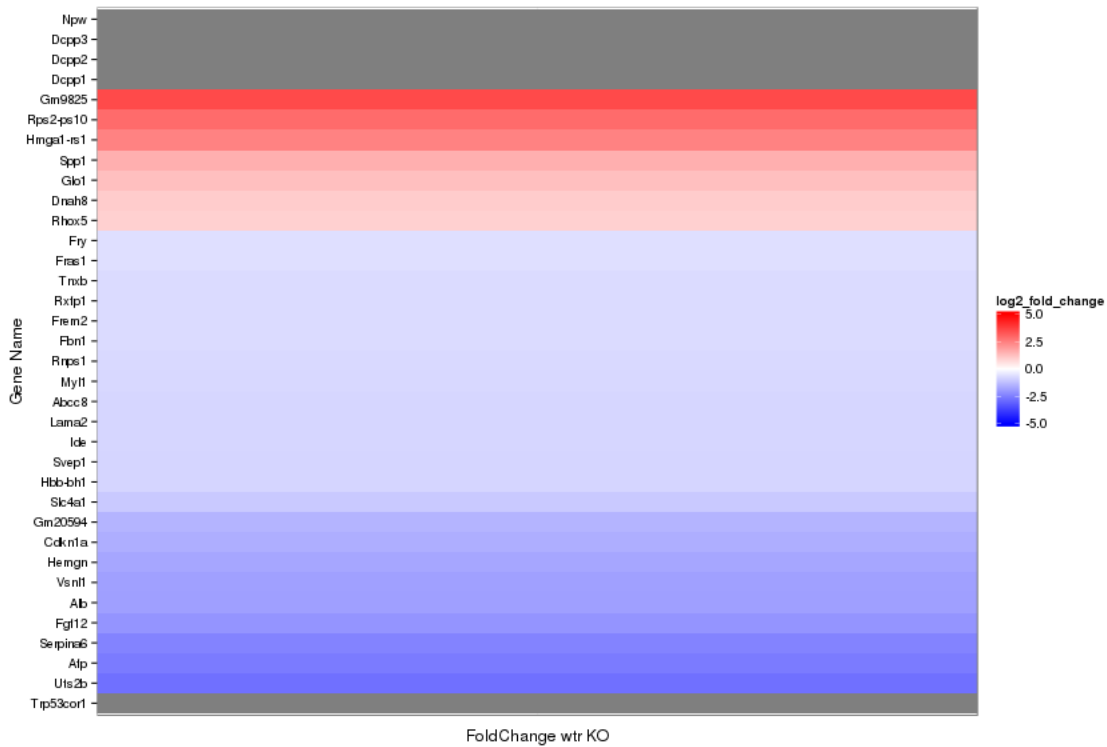

Expression heatmap of sigGenes

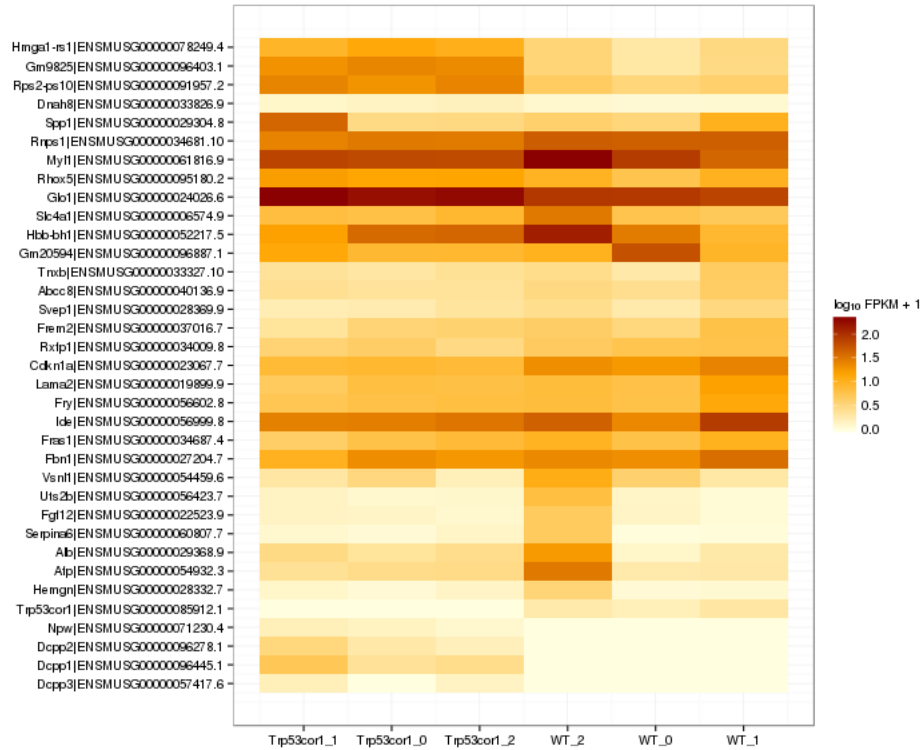

Foldchange heatmap of sigGenes

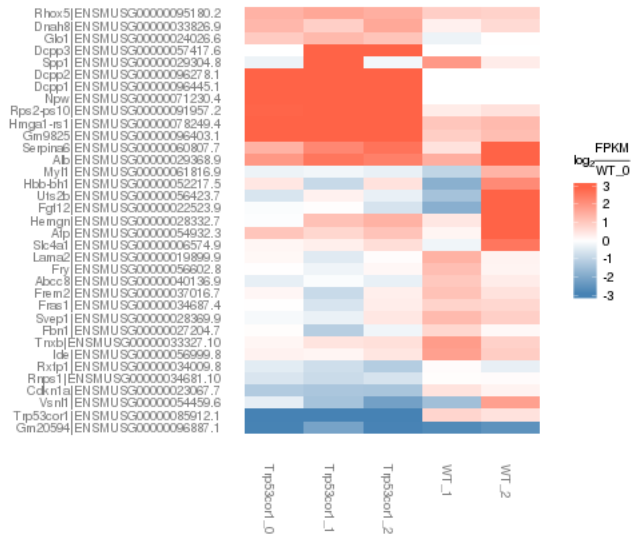

```
## Error in (function (classes, fdef, mtable) : unable to find an inherited method for function 'csFoldChangeHeatm
```

```
## Error in sqliteExecStatement(con, statement, bind.data): RS-DBI driver: (error in statement: near ")": syntax er
```

## Expression-level/significance relationship

Scatter plot of significant genes only:

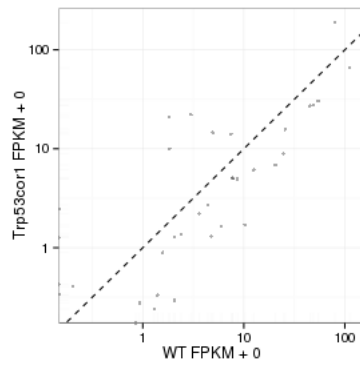

Volcano Plot

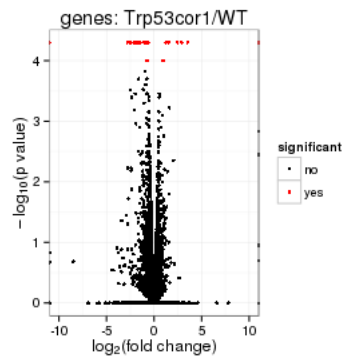

Volcano plot with significant genes only:

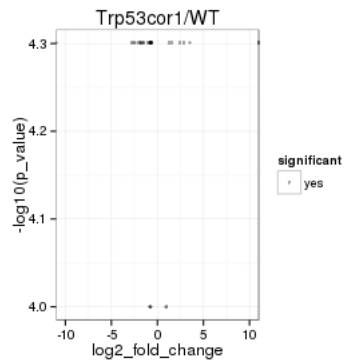

## Gene/Pathway Analysis

##

Enrichment and zscores are calculated based on expression in KO vs WT (fpmKO/fpmWT), so genes that are down regulated in KO are shown in blue, while upregulation is shown in red.

KO/WT Blue = down in KO Red = Up in KO

Biocarta enrichment:

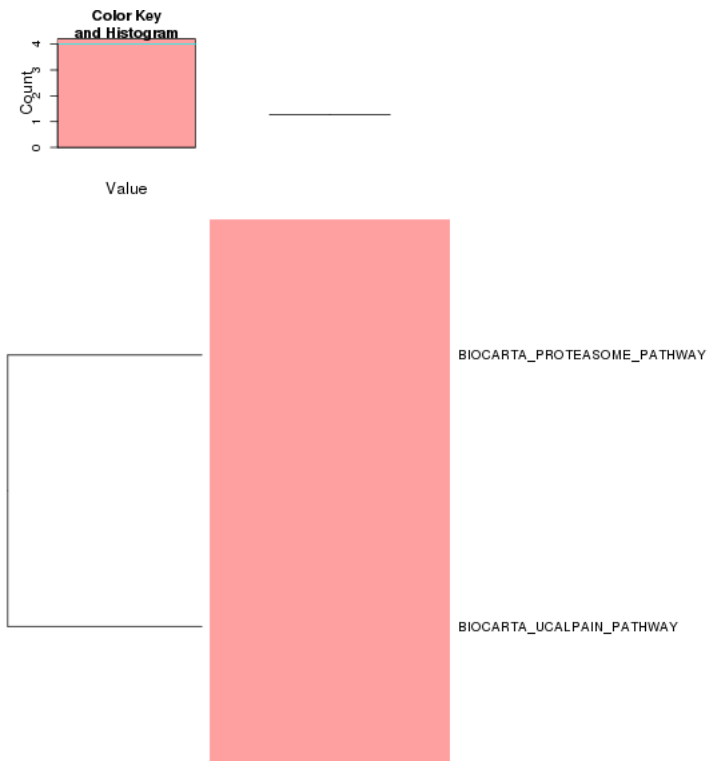

Biocarta zscore:

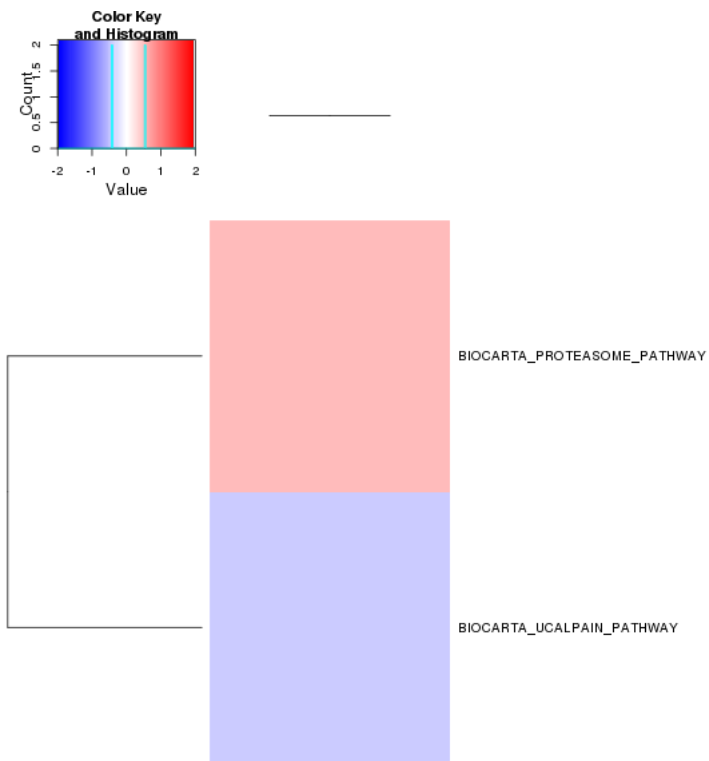

Reactome enrichment:

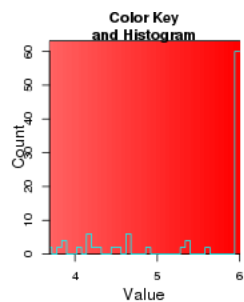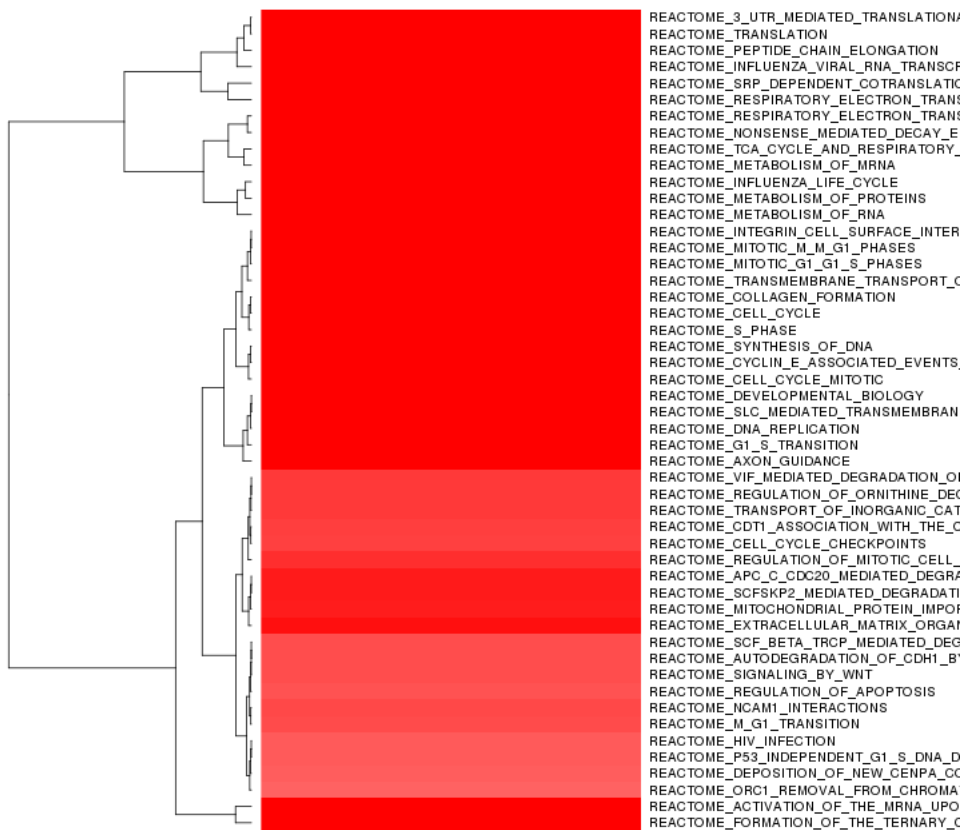

Reactome zscore:

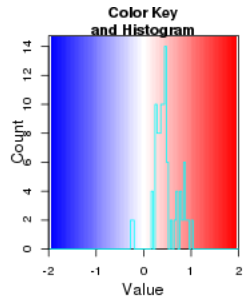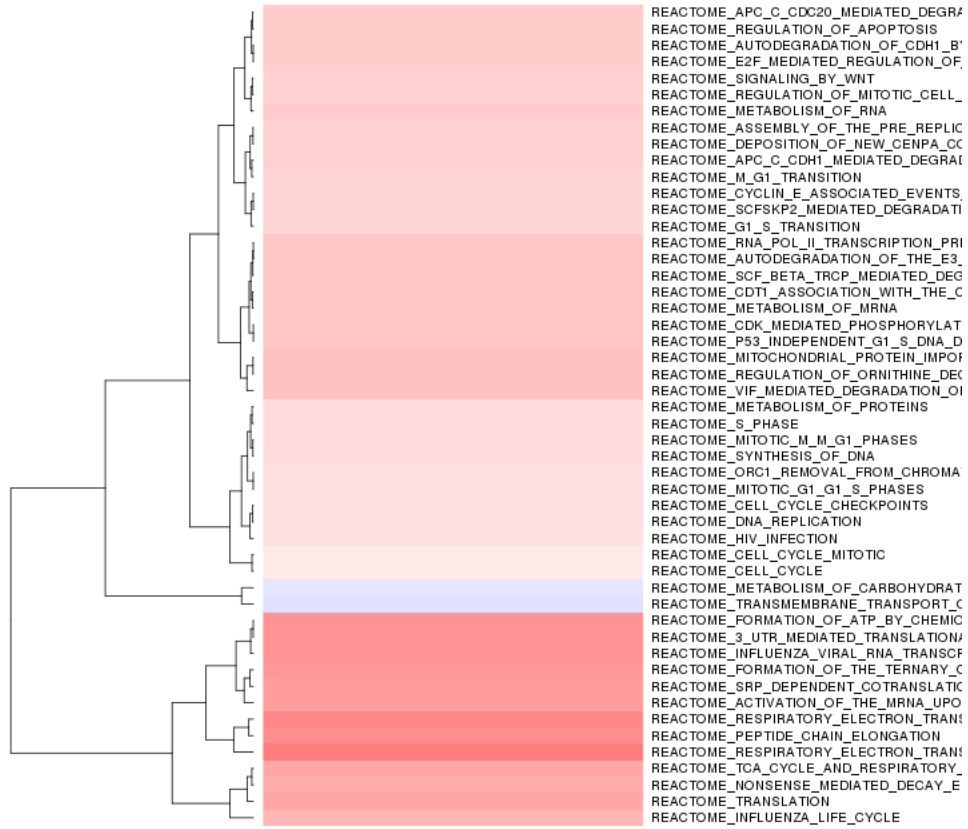

Kegg enrichment:

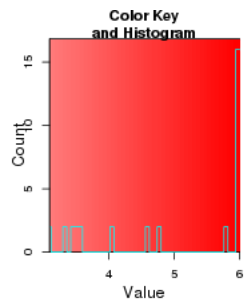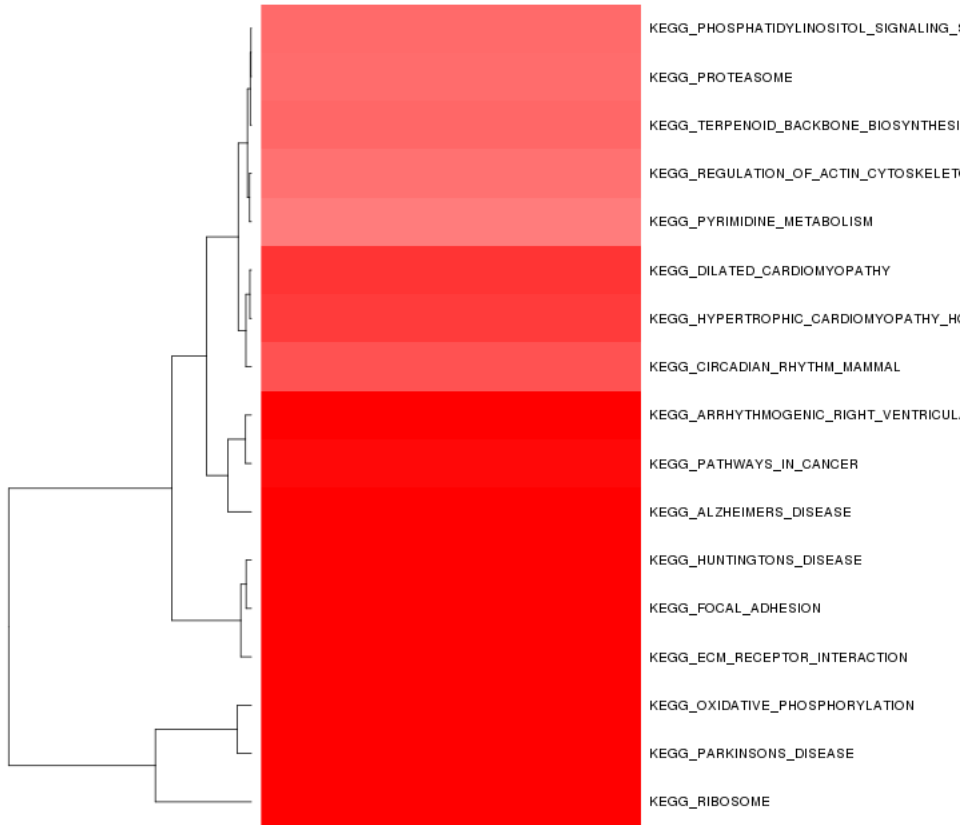

Kegg zscore:



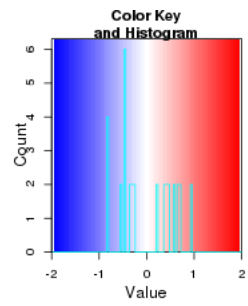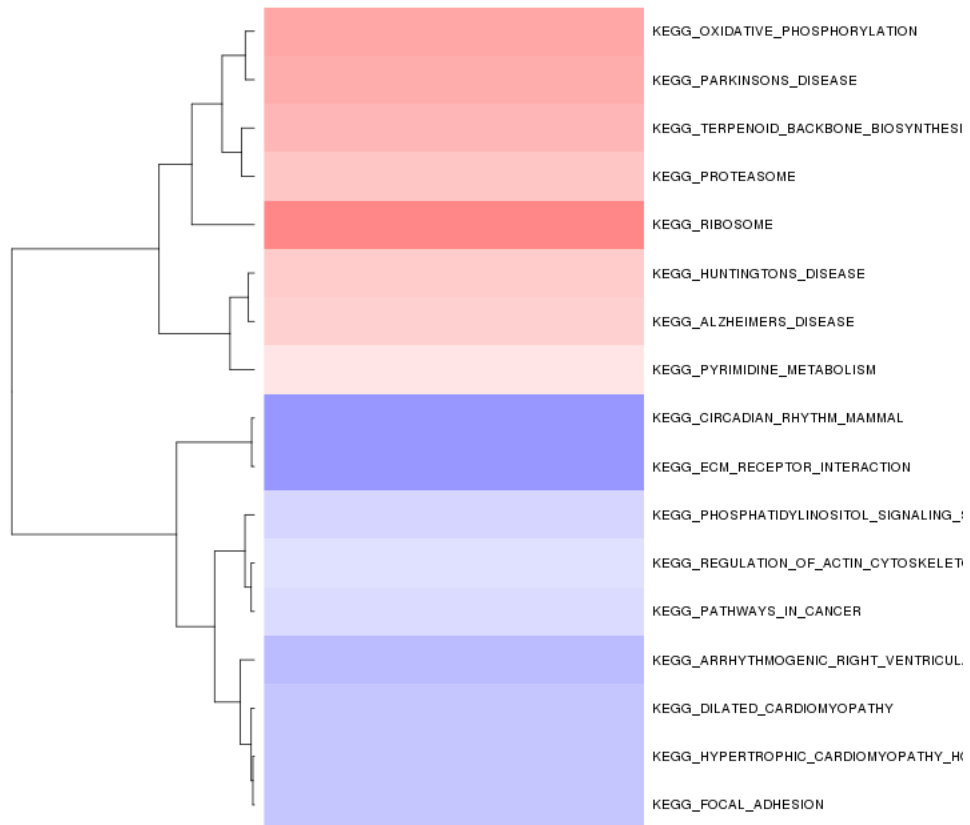

p53 enrichment:

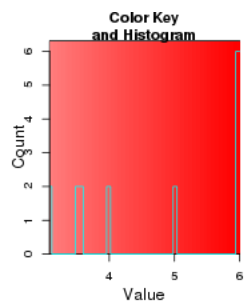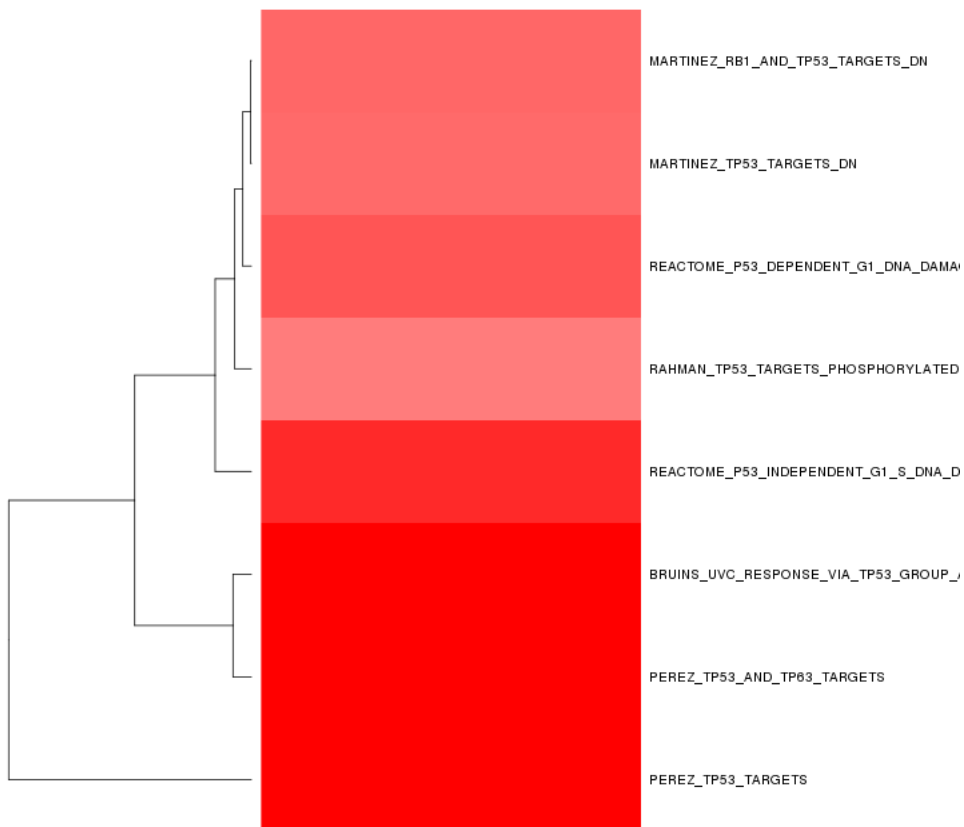

p53 zscore:

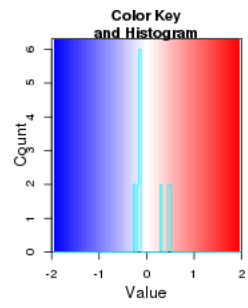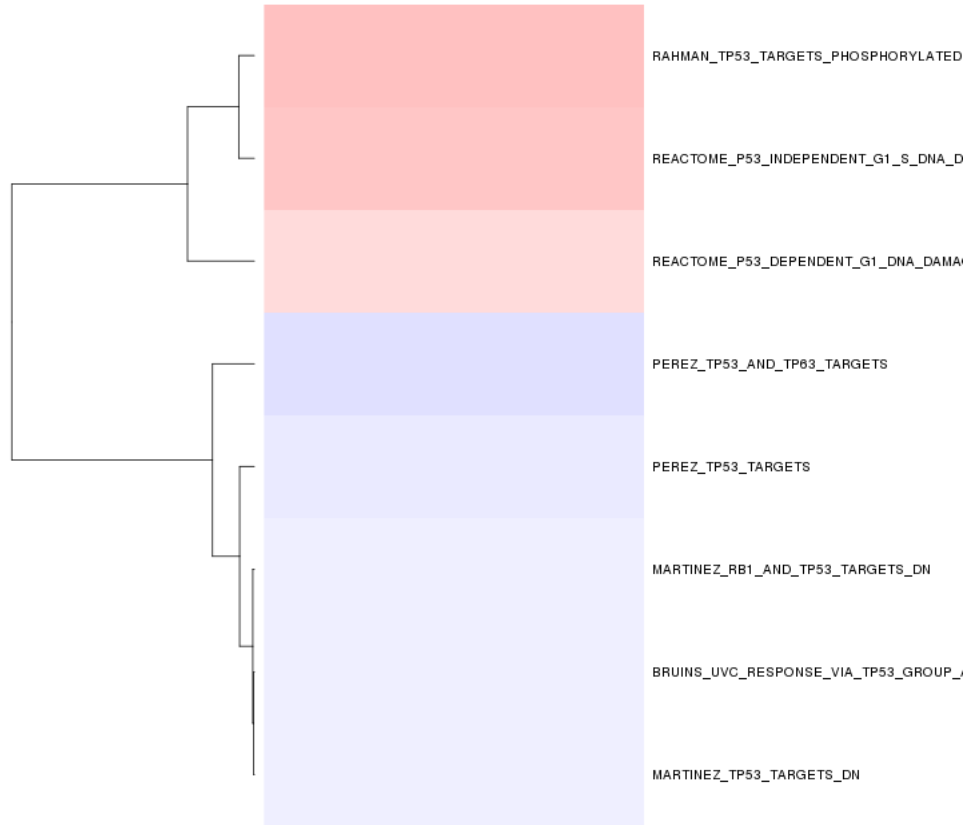

Oncogene enrichment:

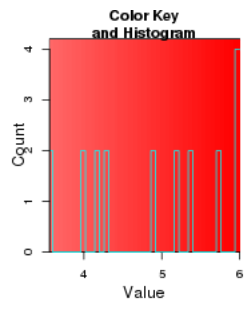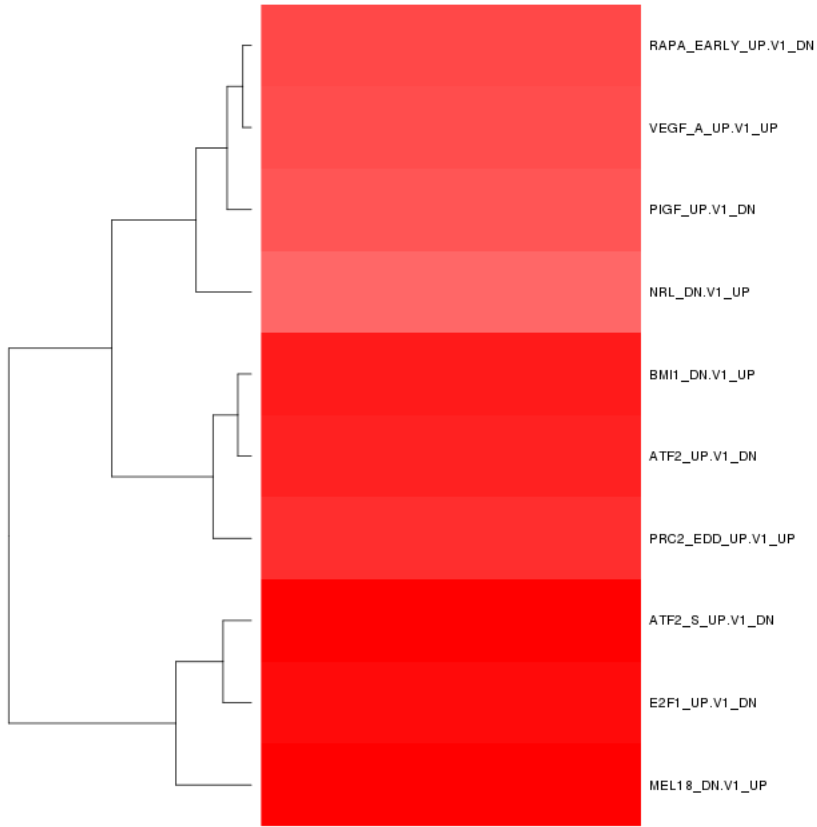

Oncogene zscore:

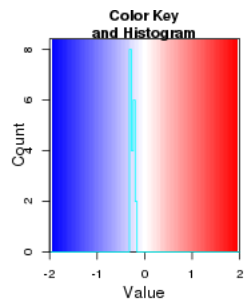

\_\_\_\_\_

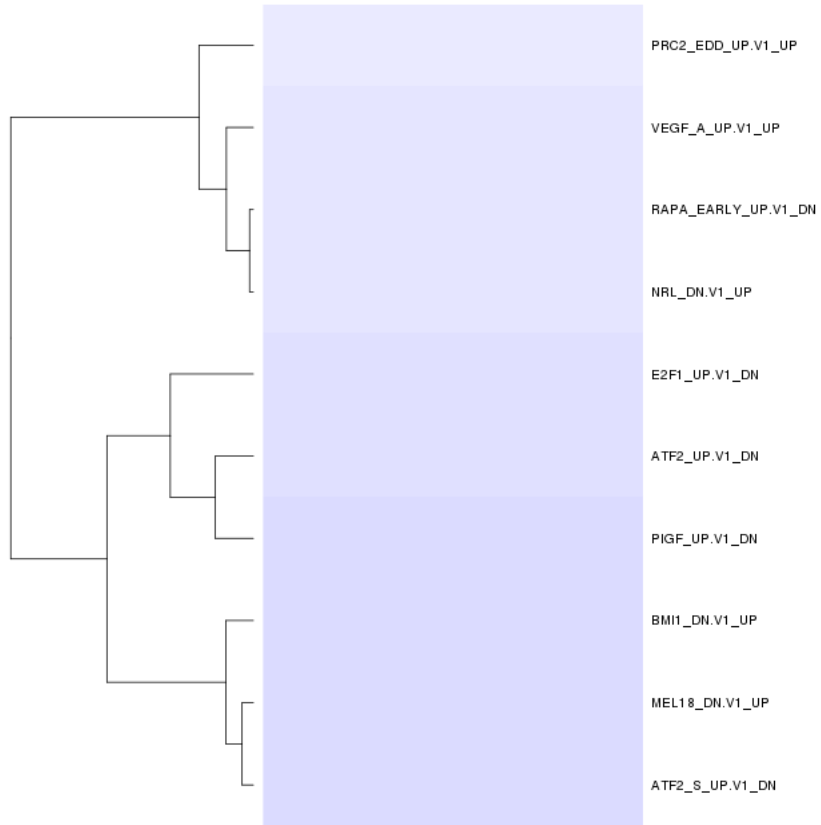

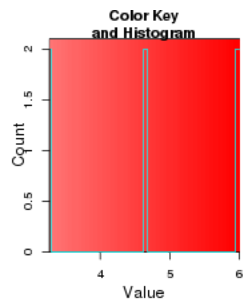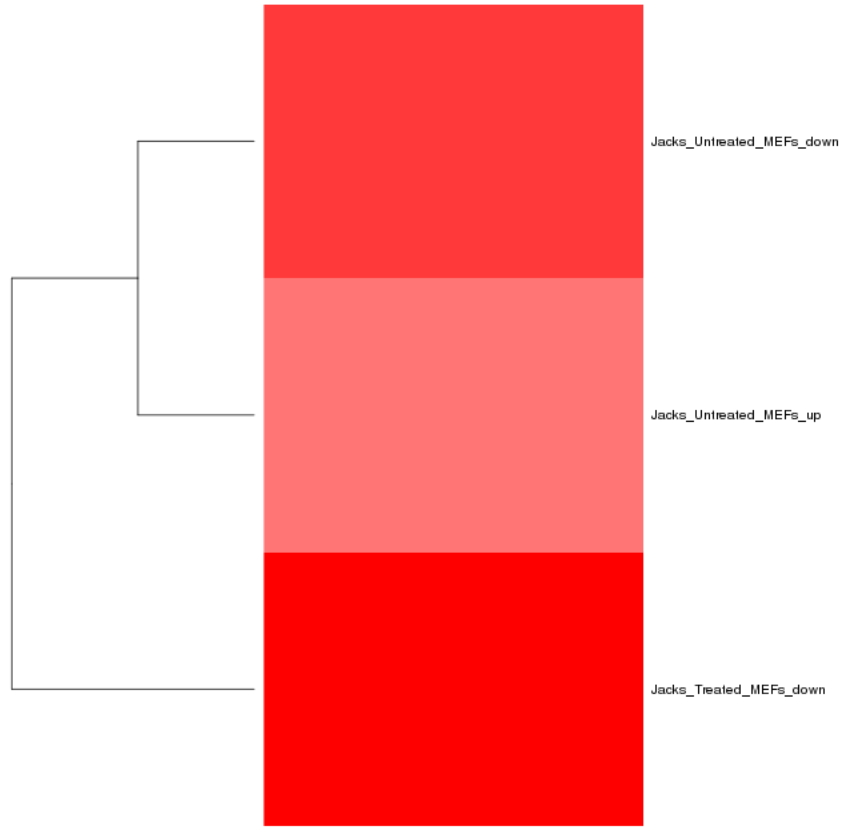

Jacks enrichment

Jacks zscore

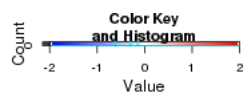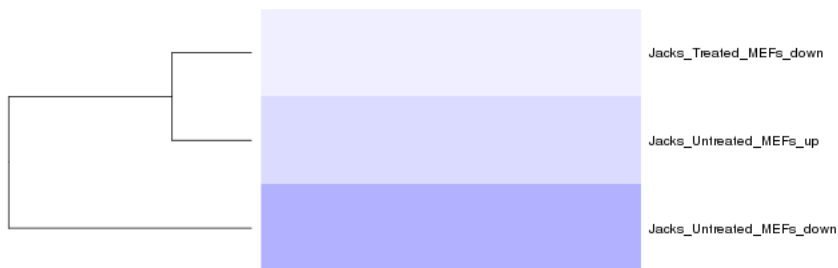

## GO enrichment

Cluster profiler used to call enrichments of significantly differentially regulated genes that map to Entrez IDs.

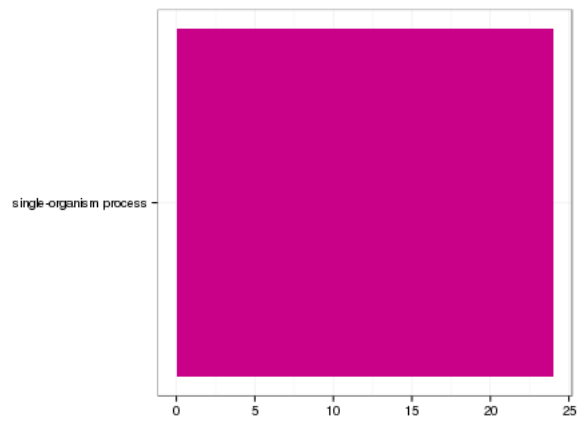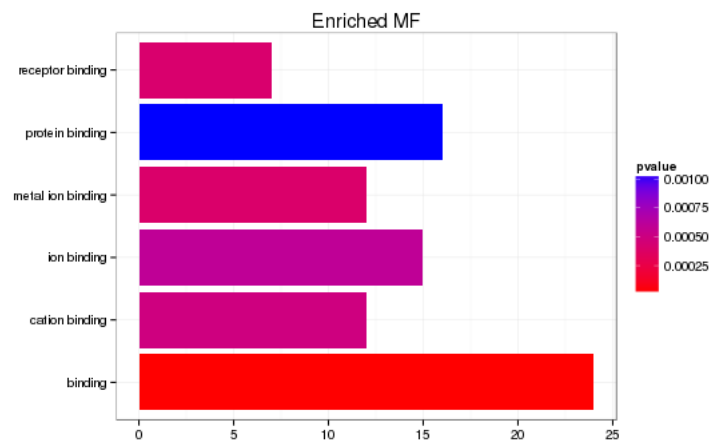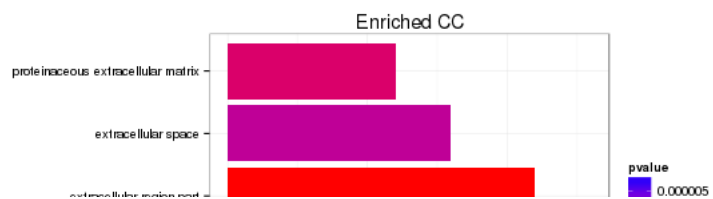

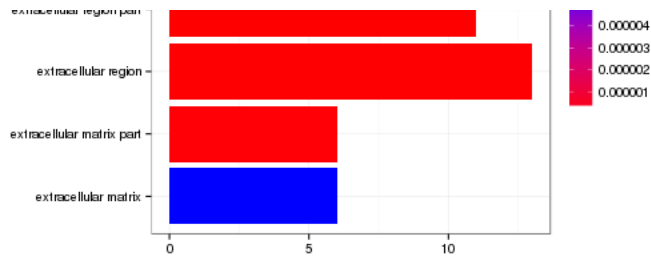

```
## Error in plot.window(...): need finite 'xlim' values
```

```
## Error in plot.window(...): need finite 'xlim' values
```

## Cis vs Trans (locally)

log<sub>2</sub> Foldchange and test statistic are calculated with the ratio of fpkm(KO)/fpkm(WT), thus the test\_stat is positive if a gene is higher in the KO and negative if a gene has lower expression in the KO

The pvalue for genes significantly regulated in a region this size is: 0.0073



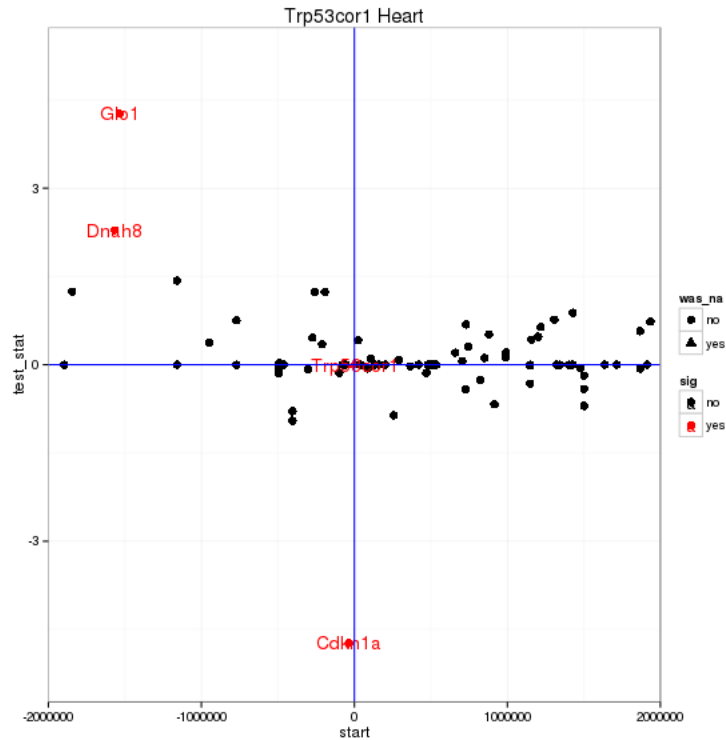

## Notes

### Samples used are:

11

- 1 JR919
- 2 JR927
- 3 JR935
- 4 JR920
- 5 JR928
- 6 JR936

## Replicates

| file                                                                                 | sample_name | replicate | rep_name    | total_mass  | norm_mass   | internal_s |
|--------------------------------------------------------------------------------------|-------------|-----------|-------------|-------------|-------------|------------|
| 1 /n/rinn_data1/users/agroff/seq/OtherMice/Diana/lincP21/quants/JR919/abundances.cxb | WT          | 0         | WT_0        | 13208700.00 | 34770500.00 |            |
| 2 /n/rinn_data1/users/agroff/seq/OtherMice/Diana/lincP21/quants/JR927/abundances.cxb | WT          | 1         | WT_1        | 37517100.00 | 34770500.00 |            |
| 3 /n/rinn_data1/users/agroff/seq/OtherMice/Diana/lincP21/quants/JR935/abundances.cxb | WT          | 2         | WT_2        | 42610300.00 | 34770500.00 |            |
| 4 /n/rinn_data1/users/agroff/seq/OtherMice/Diana/lincP21/quants/JR920/abundances.cxb | Trp53cor1   | 0         | Trp53cor1_0 | 47074400.00 | 34770500.00 |            |
| 5 /n/rinn_data1/users/agroff/seq/OtherMice/Diana/lincP21/quants/JR928/abundances.cxb | Trp53cor1   | 1         | Trp53cor1_1 | 43574500.00 | 34770500.00 |            |
| 6 /n/rinn_data1/users/agroff/seq/OtherMice/Diana/lincP21/quants/JR936/abundances.cxb | Trp53cor1   | 2         | Trp53cor1_2 | 40387600.00 | 34770500.00 |            |

## Session Info

```
## R version 3.0.2 (2013-09-25)
## Platform: x86_64-unknown-linux-gnu (64-bit)
##
## locale:
## [1] LC_CTYPE=en_US.UTF-8      LC_NUMERIC=C
## [3] LC_TIME=en_US.UTF-8      LC_COLLATE=en_US.UTF-8
## [5] LC_MONETARY=en_US.UTF-8  LC_MESSAGES=en_US.UTF-8
## [7] LC_PAPER=en_US.UTF-8     LC_NAME=C
## [9] LC_ADDRESS=C             LC_TELEPHONE=C
## [11] LC_MEASUREMENT=en_US.UTF-8 LC_IDENTIFICATION=C
##
```

```

## attached base packages:
## [1] grid      parallel  methods  stats    graphics grDevices utils
## [8] datasets base
##
## other attached packages:
## [1] plyr_1.8.1
## [2] stringr_0.6.2
## [3] seqbias_1.10.0
## [4] BSgenome.Mmusculus.UCSC.mm10_1.3.19
## [5] BSgenome_1.30.0
## [6] Biostrings_2.30.1
## [7] GO.db_2.10.1
## [8] org.Mm.eg.db_2.10.1
## [9] clusterProfiler_1.13.1
## [10] DOSE_2.0.0
## [11] ReactomePA_1.6.1
## [12] AnnotationDbi_1.24.0
## [13] Biobase_2.22.0
## [14] mgcv_1.8-2
## [15] nlme_3.1-117
## [16] RMySQL_0.9-3
## [17] RColorBrewer_1.0-5
## [18] gridExtra_0.9.1
## [19] gtable_0.1.2
## [20] marray_1.40.0
## [21] gplots_2.14.2
## [22] GSA_1.03
## [23] limma_3.18.13
## [24] xtable_1.7-3
## [25] cummeRbund_2.7.2
## [26] Gviz_1.6.0
## [27] rtracklayer_1.22.7
## [28] GenomicRanges_1.14.4
## [29] XVector_0.2.0
## [30] IRanges_1.20.7
## [31] fastcluster_1.1.13
## [32] reshape2_1.4
## [33] ggplot2_1.0.0
## [34] RSQLite_0.11.4
## [35] DBI_0.3.1
## [36] BiocGenerics_0.8.0
## [37] knitr_1.7
##
## Loaded via a namespace (and not attached):
## [1] biomaRt_2.18.0      biovizBase_1.10.8   bitops_1.0-6
## [4] caTools_1.17.1     cluster_1.15.2      colorspace_1.2-4
## [7] dichromat_2.0-0    digest_0.6.4        DO.db_2.7
## [10] evaluate_0.5.5     formatR_1.0         Formula_1.1-2
## [13] gdata_2.13.3       GenomicFeatures_1.14.5 GOsemSim_1.20.3
## [16] graph_1.40.1       graphite_1.8.1      gtools_3.4.1
## [19] Hmisc_3.14-4       igraph_0.7.1        KEGG.db_2.10.1
## [22] KernSmooth_2.23-12 labeling_0.2         lattice_0.20-29
## [25] latticeExtra_0.6-26 MASS_7.3-33         Matrix_1.1-4
## [28] munSELL_0.4.2      org.Hs.eg.db_2.10.1 proto_0.3-10
## [31] qvalue_1.36.0     Rcpp_0.11.3         RCurl_1.95-4.3
## [34] reactome.db_1.46.1 Rsamtools_1.14.3    scales_0.2.4
## [37] splines_3.0.2     stats4_3.0.2        survival_2.37-7
## [40] tcltk_3.0.2       tools_3.0.2         XML_3.98-1.1
## [43] zlibbioc_1.8.0

```

## Run Info

```
##      param
## 1    cmd_line
## 2      version
## 3  SVN_revision
## 4 boost_version
## 5      genome
##
## 1 cuffdiff -p 10 -L WT,Trp53cor1 -o /n/rinn_data1/users/agroff/seq/OtherMice/Diana/lincP21/diff/Trp53cor1_E14.5_
## 2
## 3
## 4
## 5
```

# Trp53cor1 KO vs WT (leg)

This file shows the wt-v-ko comparison for Trp53cor1.

Cuff overview:

```
## CuffSet instance with:  
## 2 samples  
## 26754 genes  
## 77524 isoforms  
## 0 TSS  
## 23066 CDS  
## 0 promoters  
## 0 splicing  
## 19954 relCDS
```

## QC

### Dispersion

Dispersion plot for genes in cuff: (Overdispersion can lead to inaccurate quants)

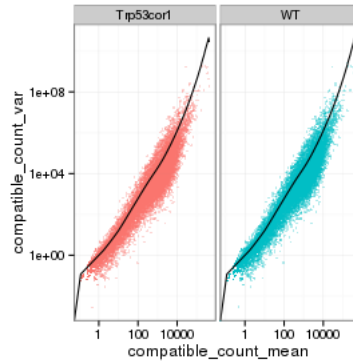

### Cross-replicate variability (fpkmSCVplot)

Differences in CV 2 can result in lower numbers of differentially expressed genes due to a higher degree of variability between replicate fpkm estimates.

Genes:

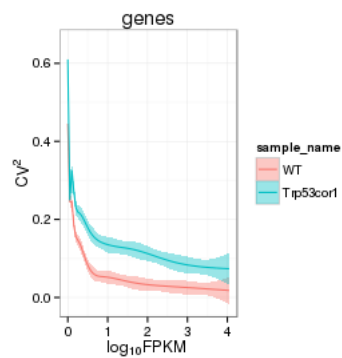

Isoforms:

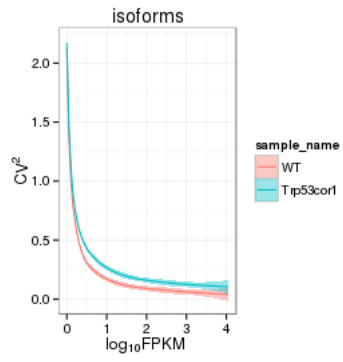

## MvA plot

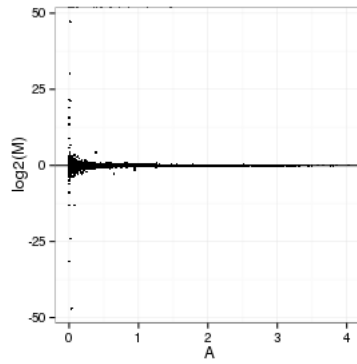

## MvA plot counts

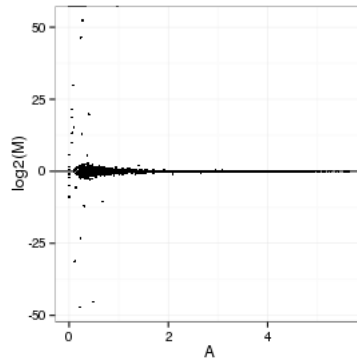

## Scatterplot matrix

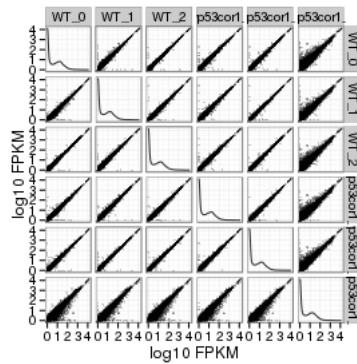

# Distributions

## Boxplots

Boxplot (genes)

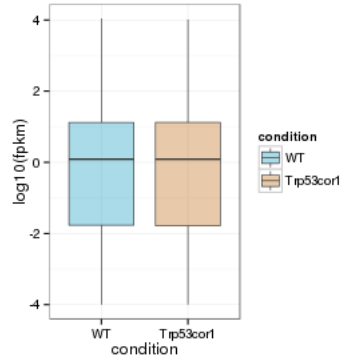

Boxplot (genes, replicates)

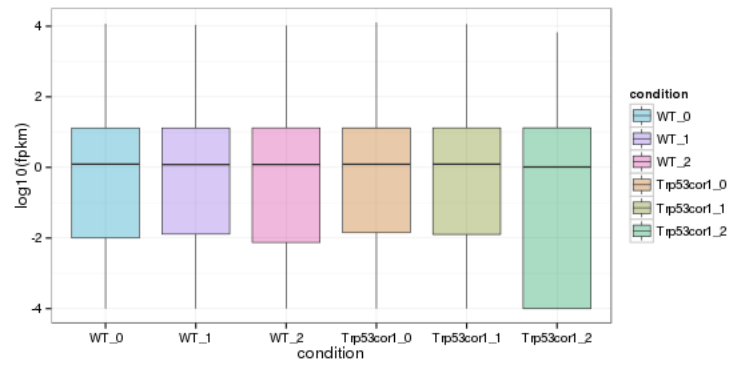

Boxplot (isoforms)

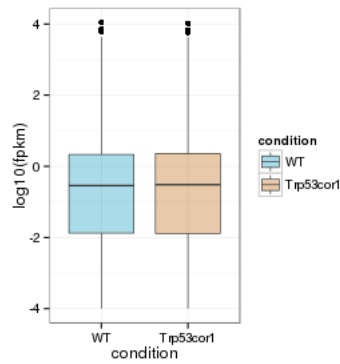

Boxplot (isoforms, replicates)

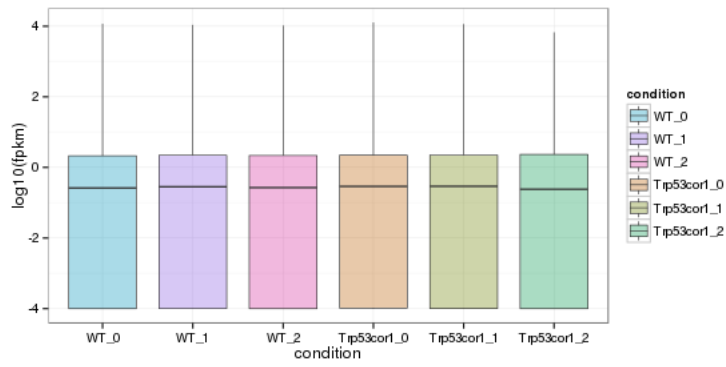

## Density

Density (genes)

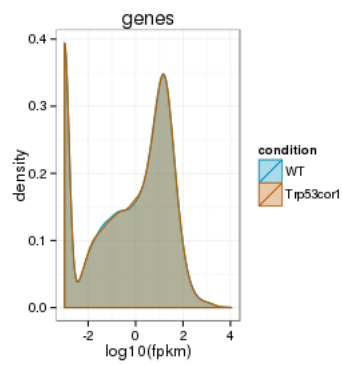

Density (genes, replicates)

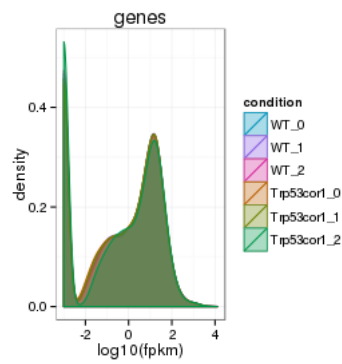

## Clustering

Replicate Clusters

### All genes(cuff)

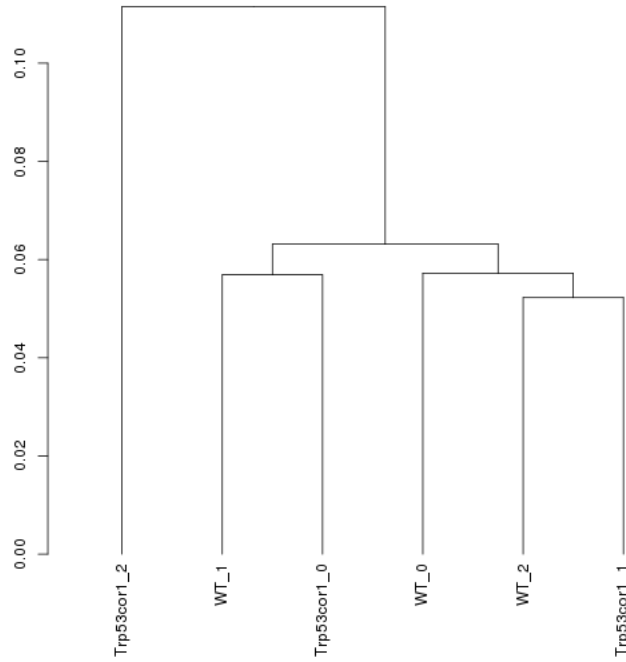

## NULL

### PCA (genes)

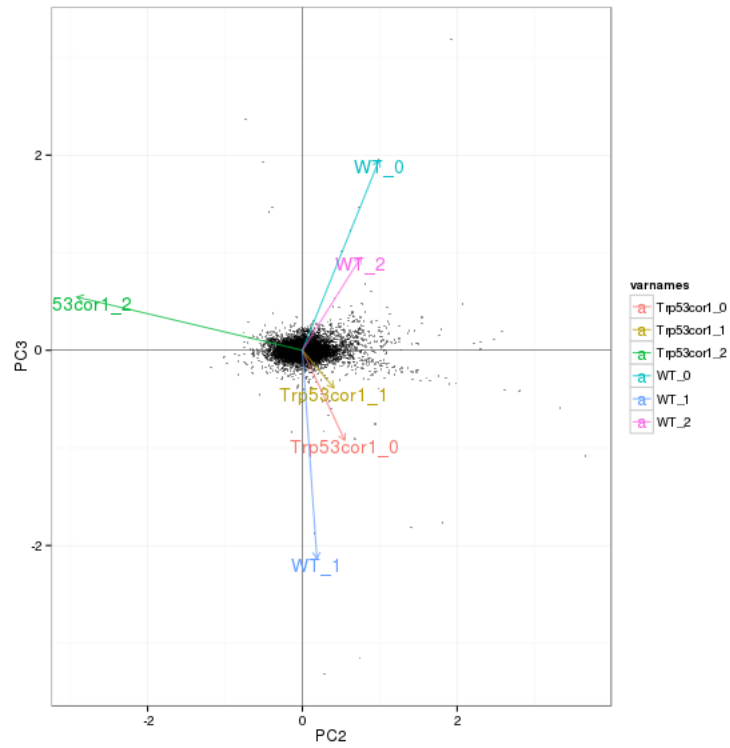

### MDS (genes)



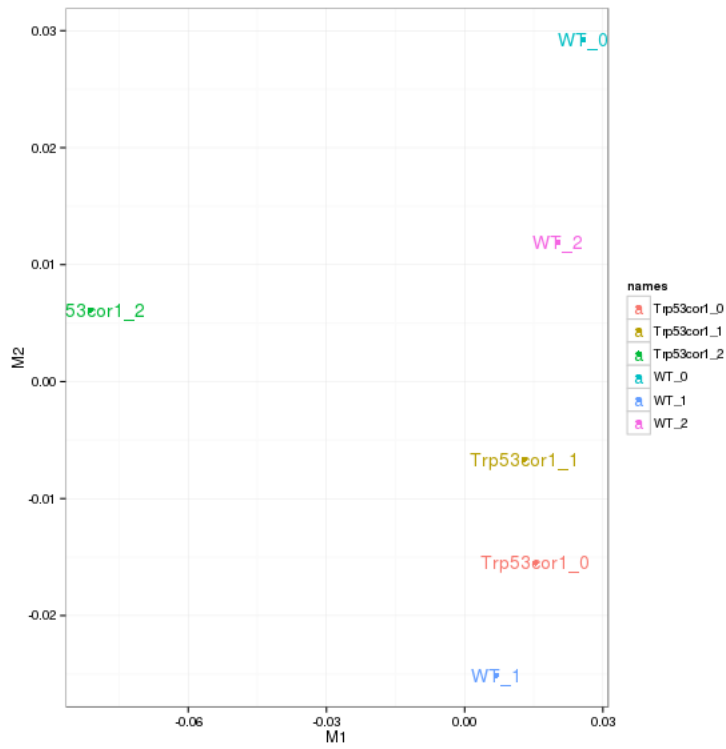

## KO assessment

### Endogenous IncRNA expression

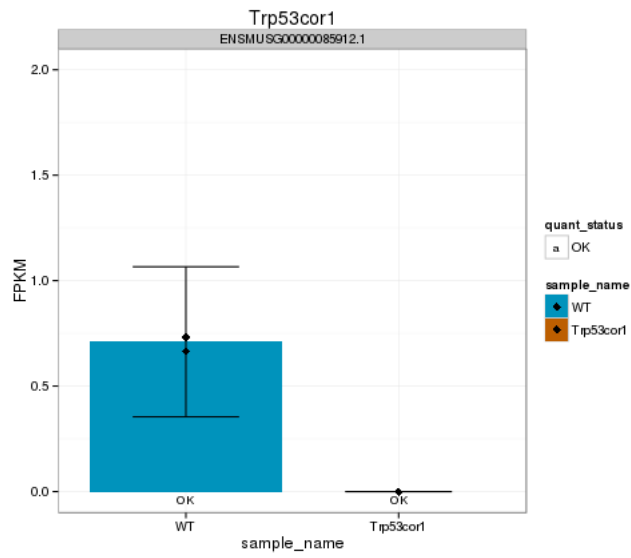

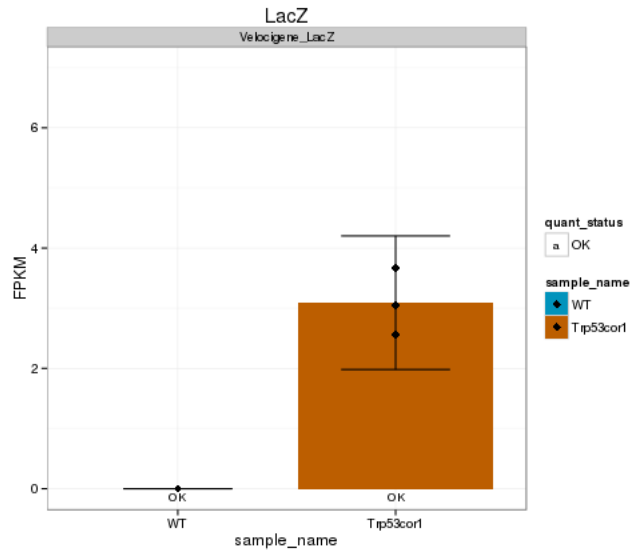

## Digital Genotyping (LacZ vs Endogenous lincRNA and Sex)

Eif2s3y is a y-expressed gene, Xist is an x-expressed gene Expression plot (endogenous linc, lacZ, Y-expressed gene):

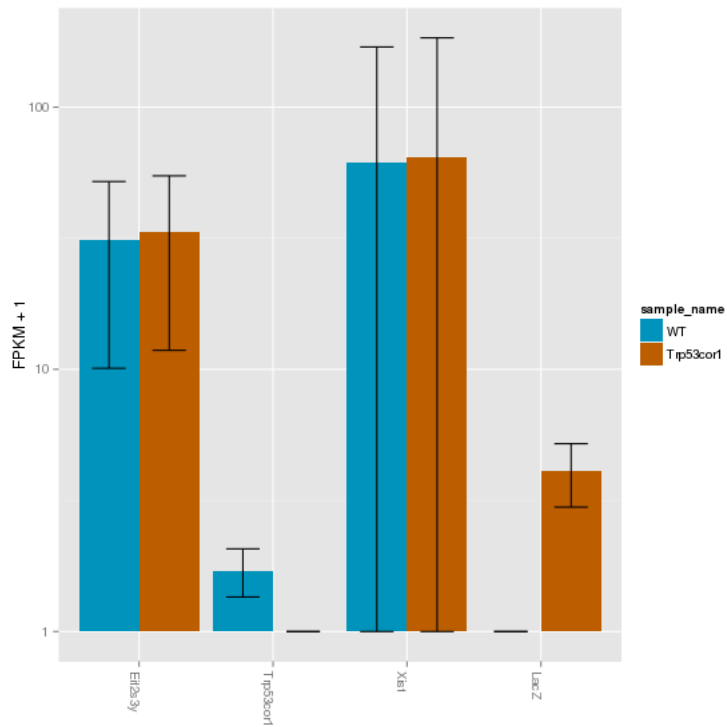

Expression heatmap:

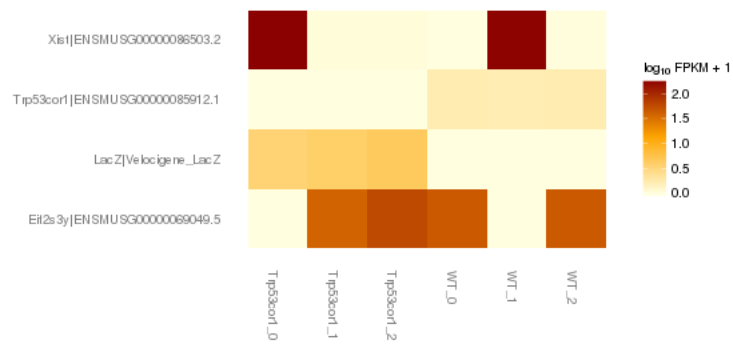

## Track visualization

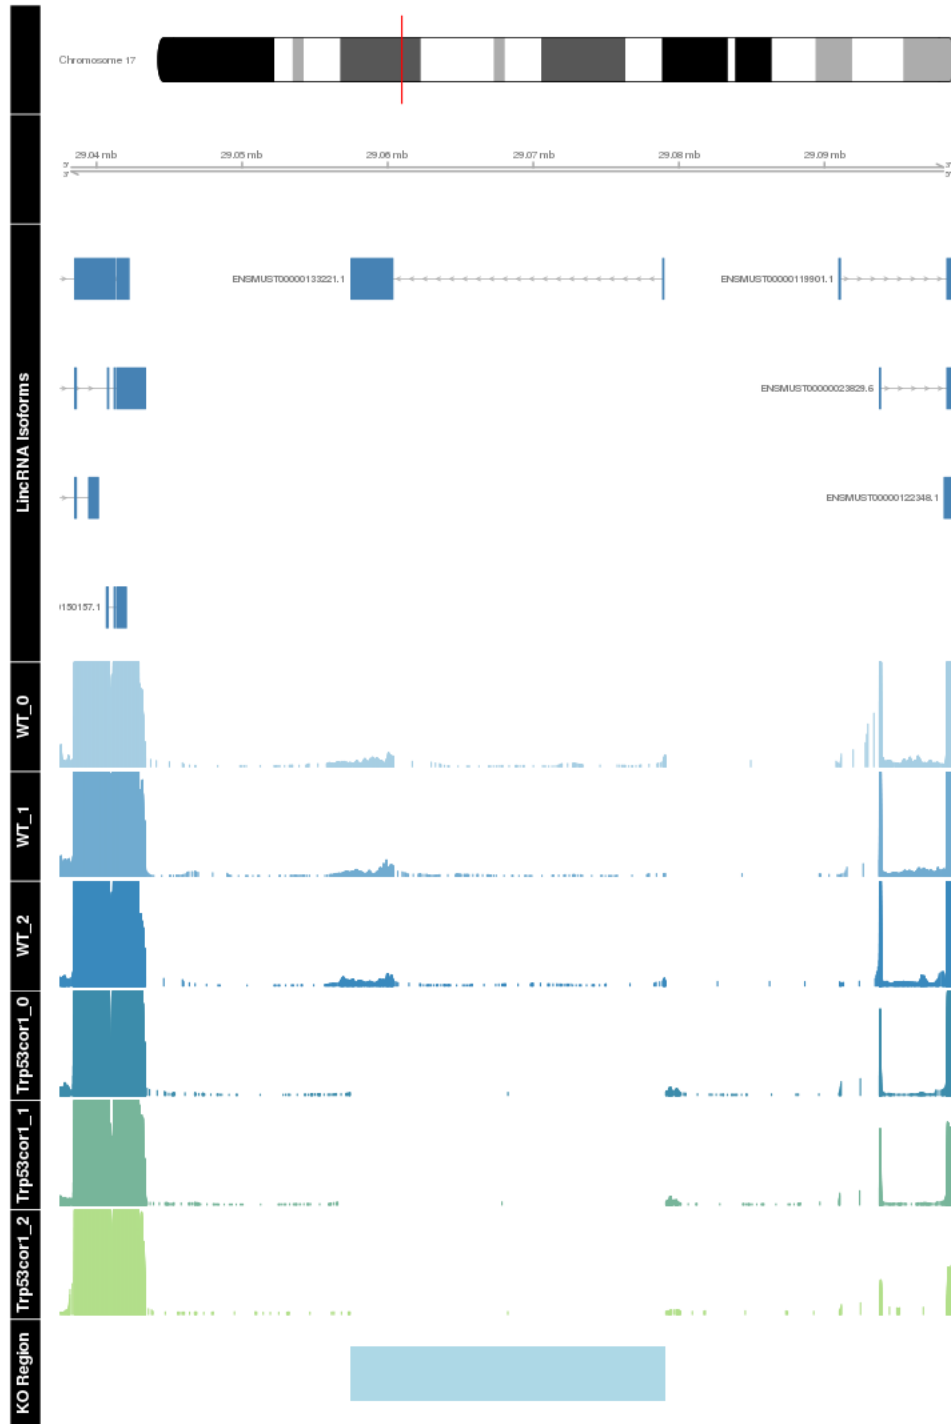

## Differential Analysis

### Differential Genes

There are 103 significantly differentially expressed genes. They are:

**geneAnnot\$gene\_short\_name**

- 1 Sox9
- 2 Dynl1tc
- 3 Calb2
- 4 Aqp1
- 5 Syng3
- 6 Igln5

7 Atp1b4  
8 Matn4  
9 Aoc3  
10 Krt10  
11 Thbs4  
12 Ldb3  
13 Sept3  
14 Cdkn1a  
15 Zscan10  
16 Glo1  
17 Prss41  
18 Tpsab1  
19 Ankrd1  
20 Oprk1  
21 Des  
22 Tnnt2  
23 Rgs5  
24 Hsd3b6  
25 Pla2g2f  
26 Alpl  
27 Htra3  
28 Spp1  
29 Ibsp  
30 Dmp1  
31 Cdk2ap1  
32 Abcc9  
33 Ckm  
34 Mylpf  
35 Tnni2  
36 Tnmd  
37 Sall1  
38 Hsd11b2  
39 Wwp2  
40 Ngp  
41 Ltf  
42 Asprv1  
43 Calm4  
44 Tpsb2  
45 Dnah8  
46 Evpl  
47 Rnps1  
48 3110052M02Rik  
49 Arhgap36  
50 Tmem181a  
51 Cer1  
52 Ppl  
53 BC006965  
54 Cilp  
55 Bex2  
56 Rpsa-ps10  
57 Nrap  
58 Prss27  
59 Islr2  
60 Hbb-y  
61 Hbb-bh1  
62 Actn2  
63 Myh7  
64 Lgals7  
65 Dsp

66 Stfa3  
67 Hba-x  
68 Myh8  
69 S100a8  
70 S100a9  
71 Hmga2  
72 Krt4  
73 Dsc3  
74 Unc5c  
75 Myl4  
76 Myl1  
77 Cyt11  
78 Rpl9-ps6  
79 Fabp4  
80 Krt77  
81 Nnat  
82 Dsg1a  
83 Gm10275  
84 Hba-a2  
85 Hba-a1  
86 BC100530  
87 9030025P20Rik  
88 Krt14  
89 Dnm3os  
90 Hmga1-rs1  
91 Ntn3  
92 Pisd-ps1  
93 9430024E24Rik  
94 Trp53cor1  
95 Gm15500  
96 1110002E22Rik  
97 Rps2-ps10  
98 Gm20546  
99 Tmem181c-ps  
100 Gm6472  
101 Dynlt1b  
102 Gm9825  
103 LacZ

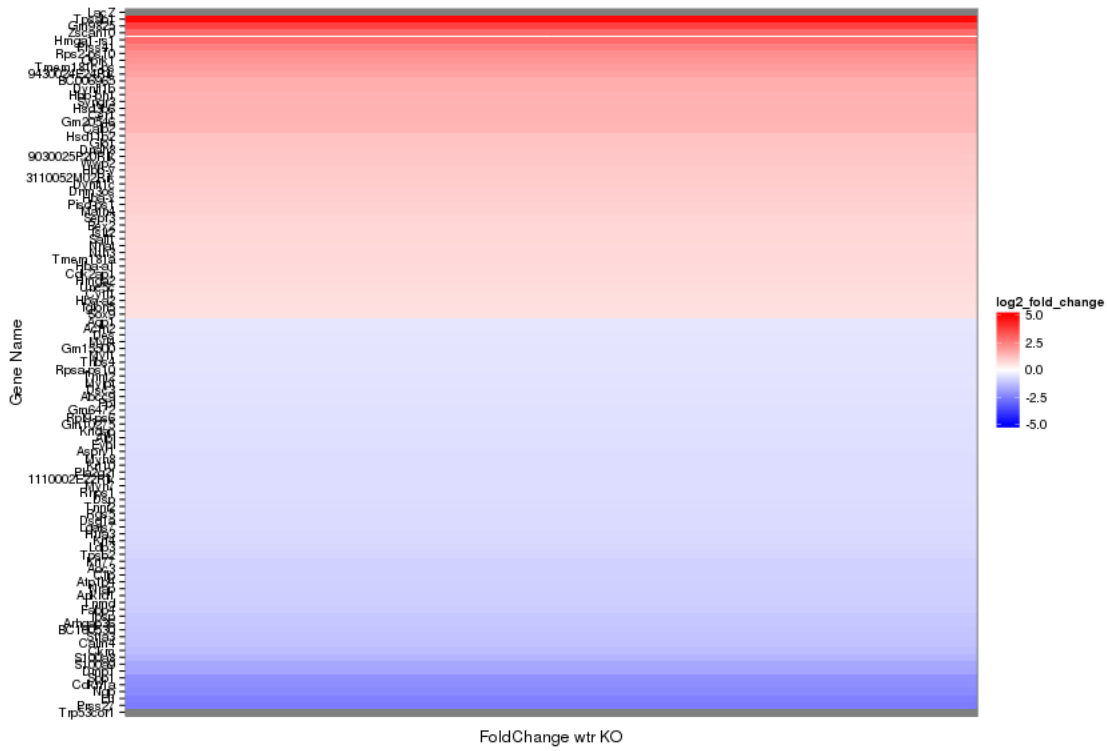

Expression heatmap of sigGenes

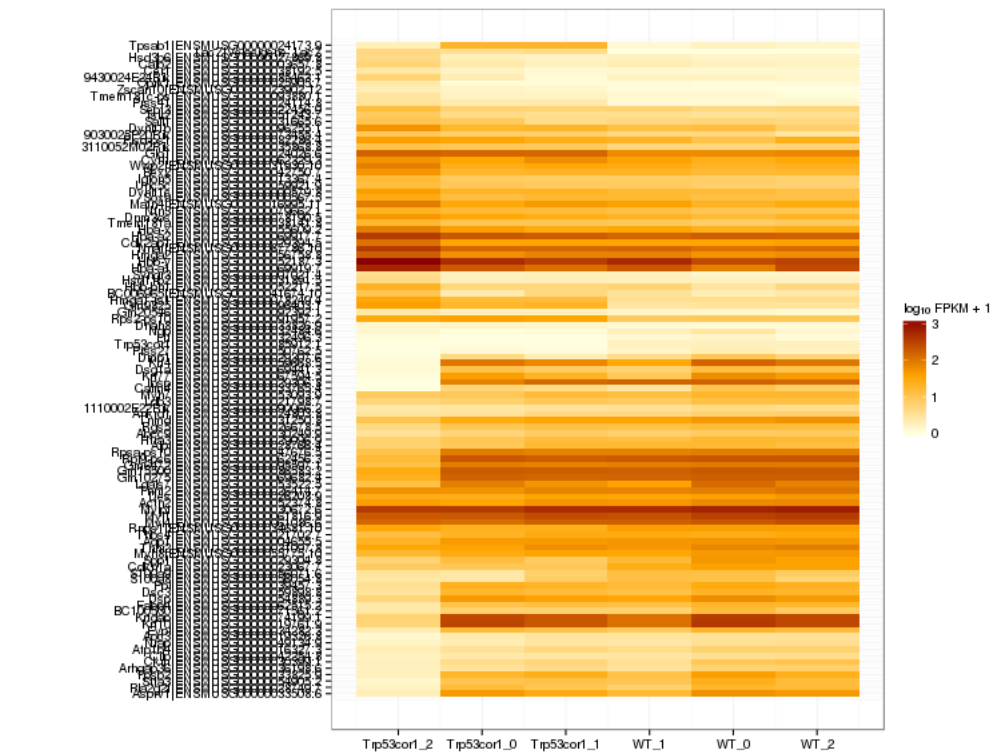

Foldchange heatmap of sigGenes

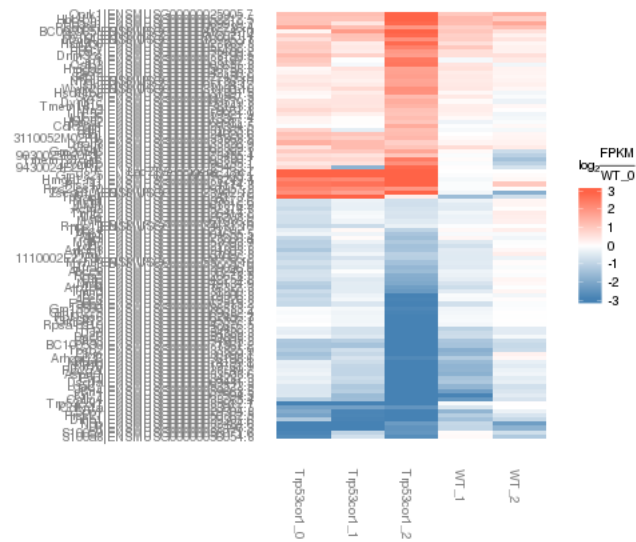

```
## Error in (function (classes, fdef, mtable) : unable to find an inherited method for function 'csFoldChangeHeatm
```

```
## Error in sqliteExecStatement(con, statement, bind.data): RS-DBI driver: (error in statement: near ")": syntax er
```

### Expression-level/significance relationship

Scatter plot of significant genes only:

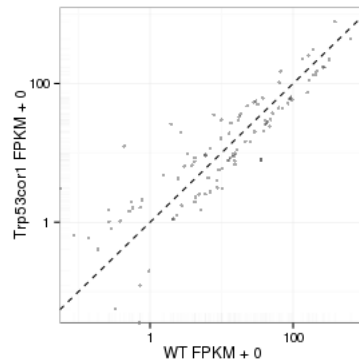

Volcano Plot

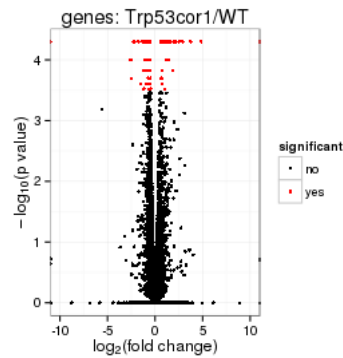

Volcano plot with significant genes only:



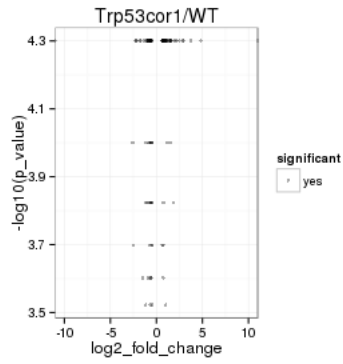

## Gene/Pathway Analysis

##

Enrichment and zscores are calculated based on expression in KO vs WT (fpkmKO/fpkmWT), so genes that are down regulated in KO are shown in blue, while upregulation is shown in red.

KO/WT Blue = down in KO Red = Up in KO

Biocarta enrichment:

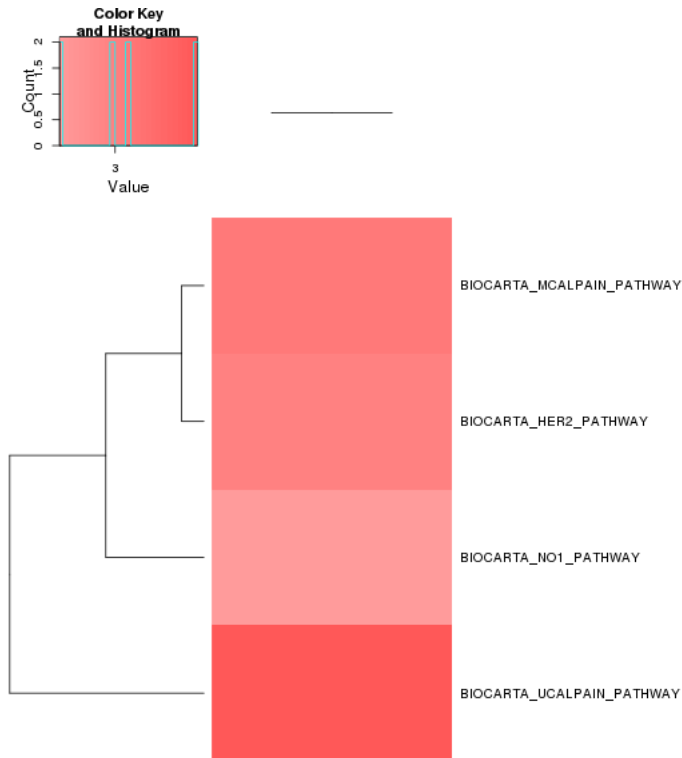

Biocarta zscore:

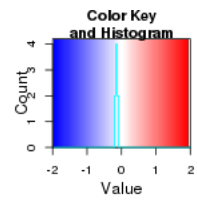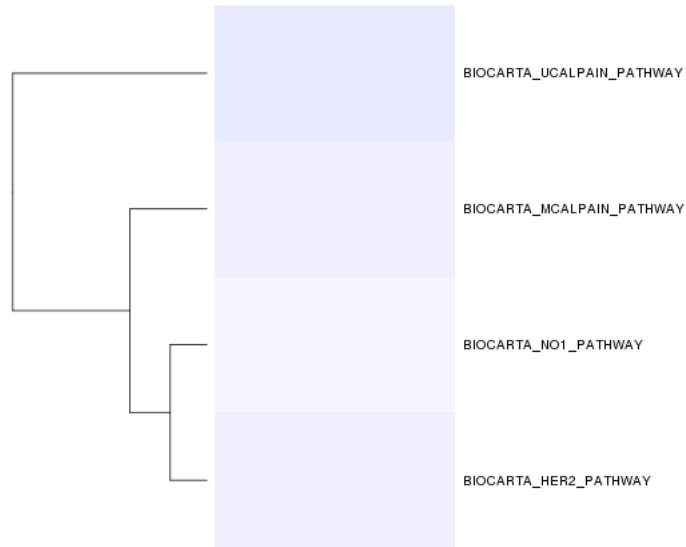

Reactome enrichment:

```
## Error in x_ordered[1:50, ]: subscript out of bounds
```

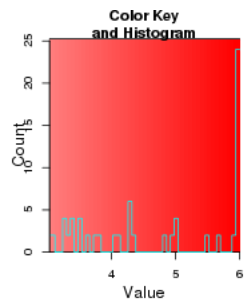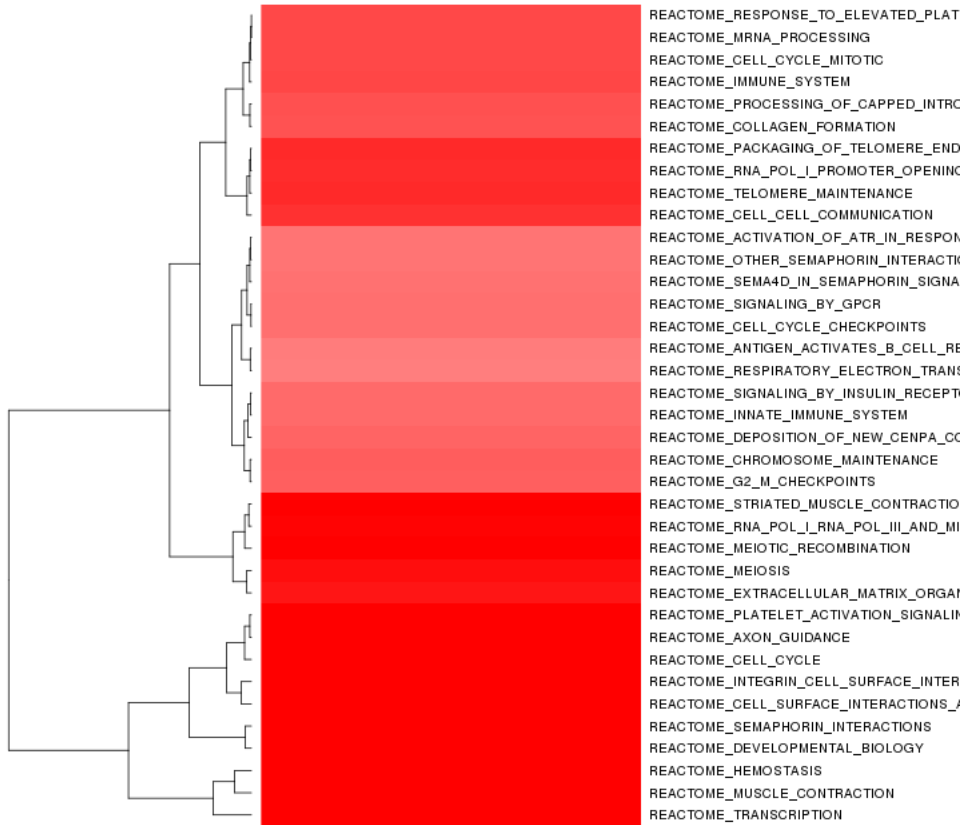

Reactome zscore:

```
## Error in x_ordered[1:50, ]: subscript out of bounds
```

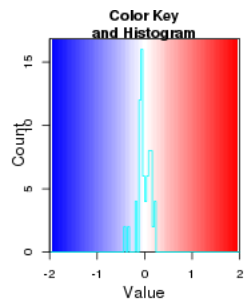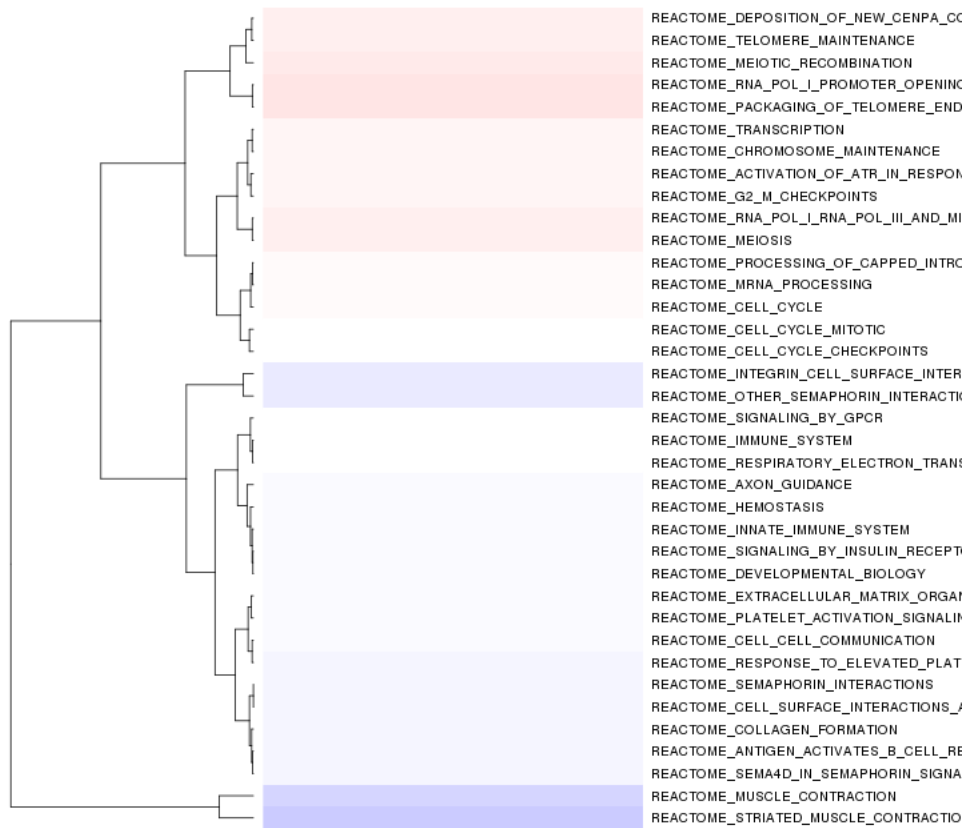

Kegg enrichment:

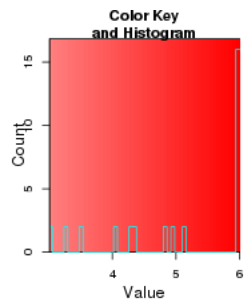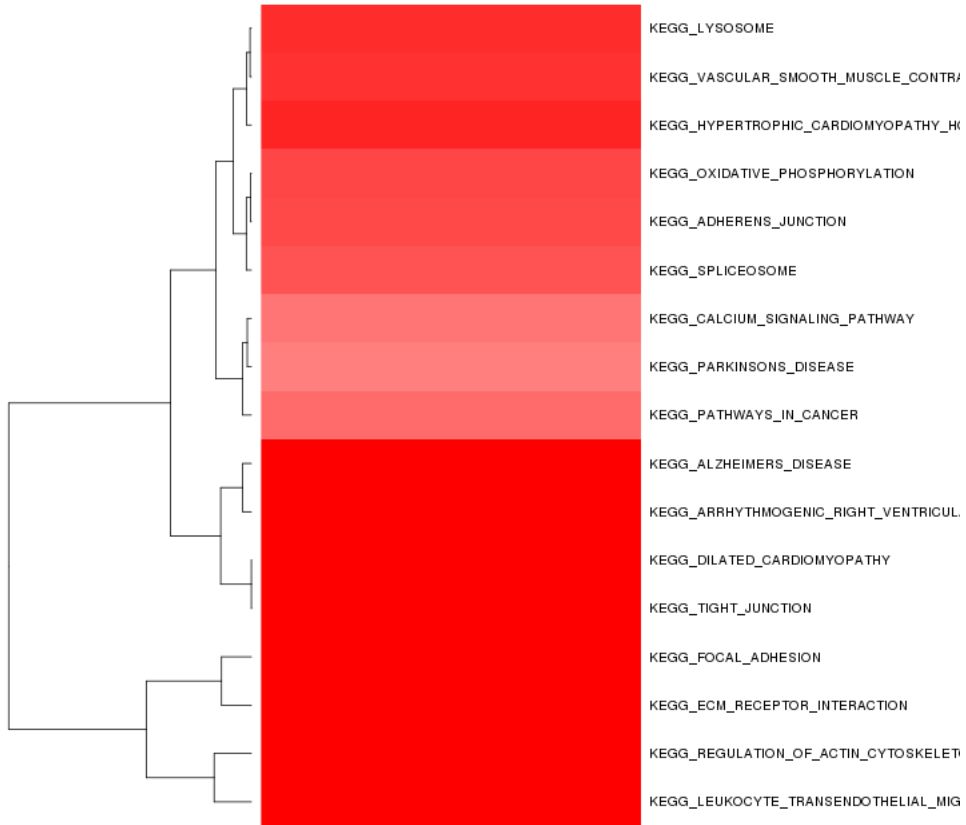

Kegg zscore:

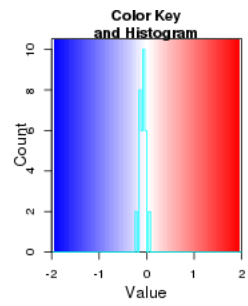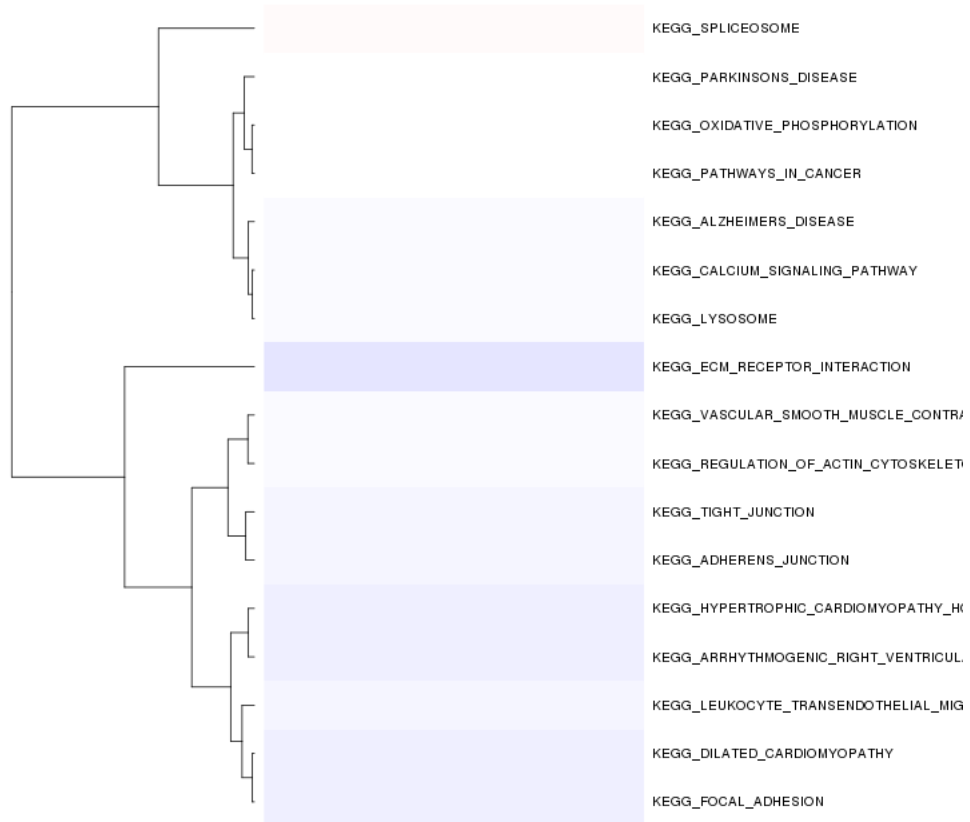

p53 enrichment:

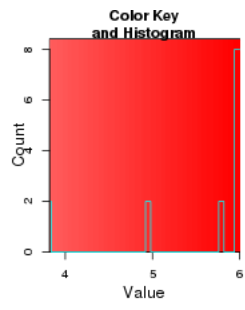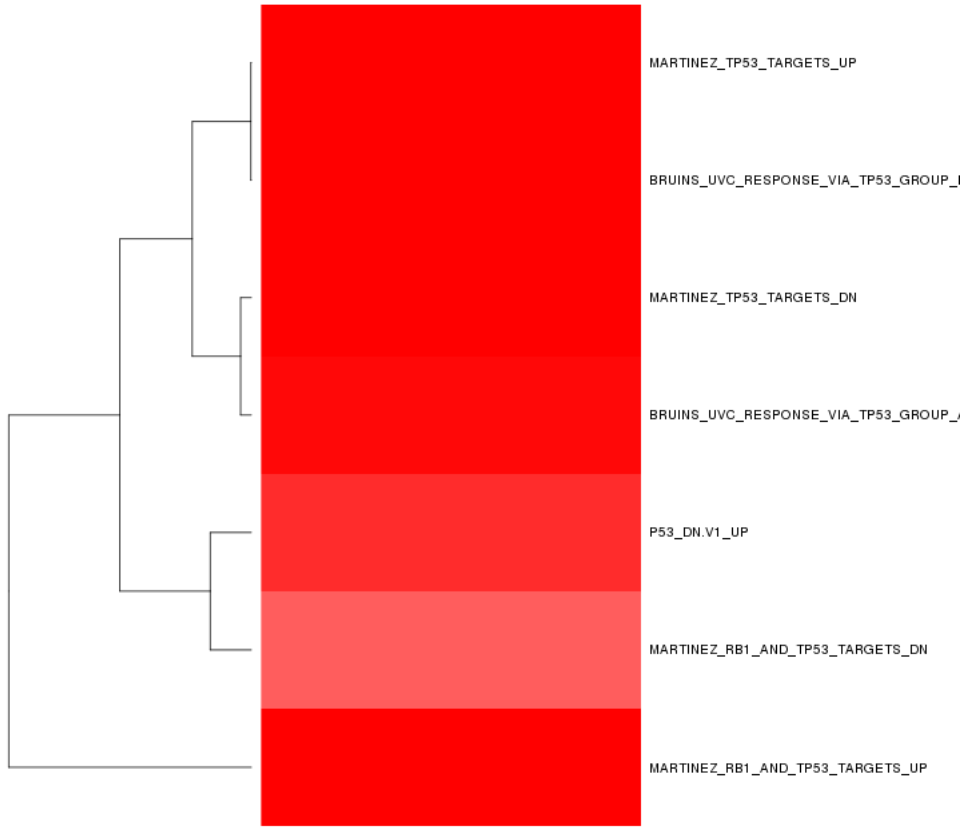

p53 zscore:

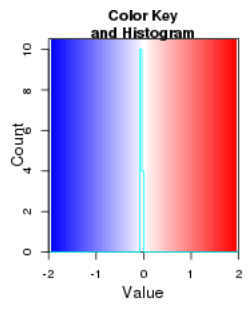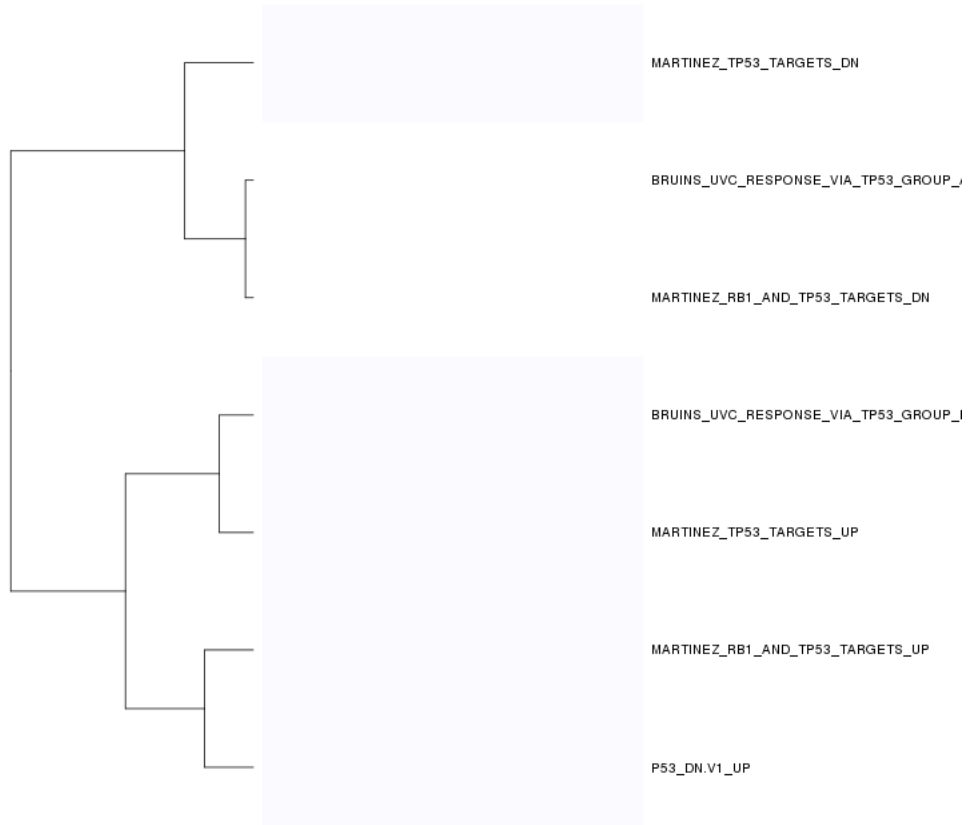

Oncogene enrichment:



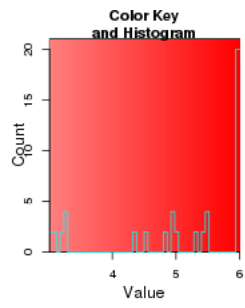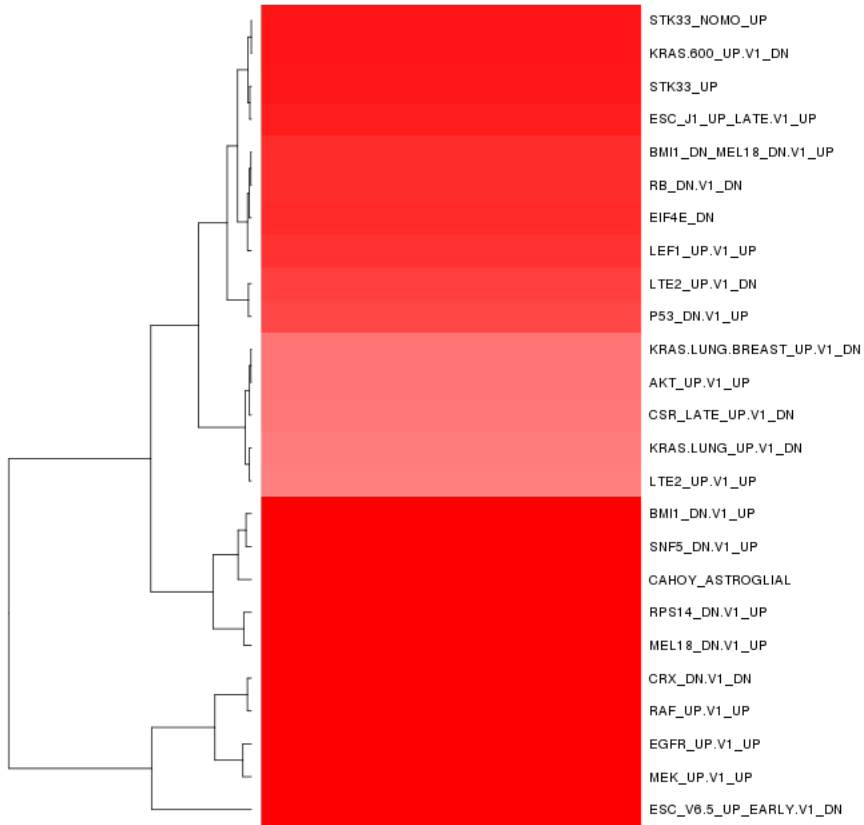

Oncogene zscore:

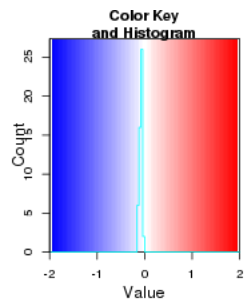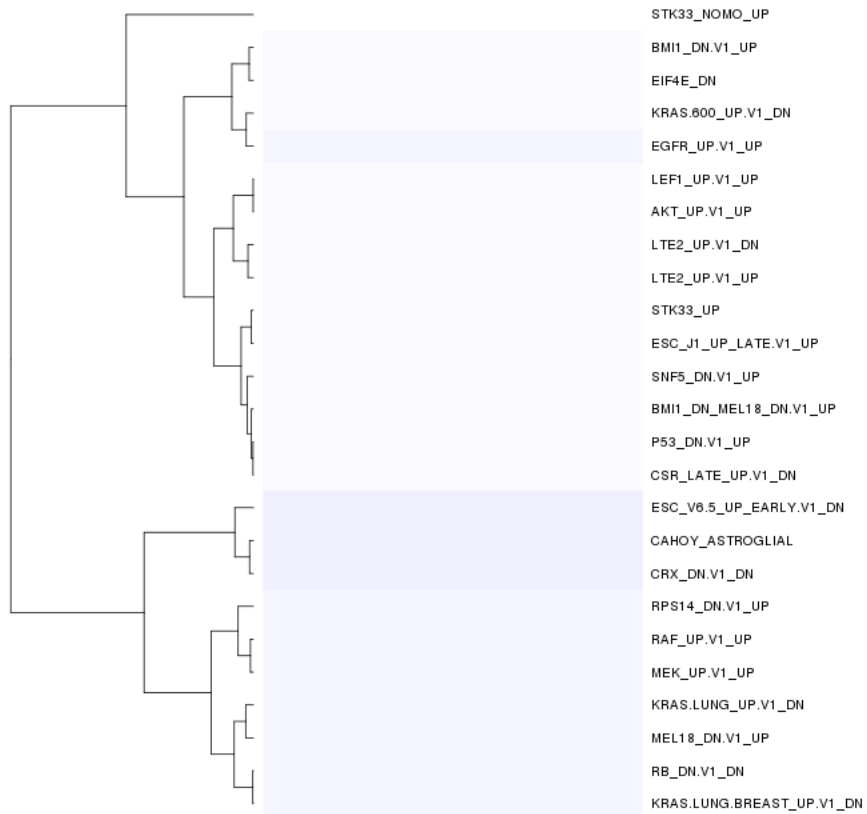

Jacks enrichment

```
## Error in (function (side, at = NULL, labels = TRUE, tick = TRUE, line = NA, : no locations are finite
```

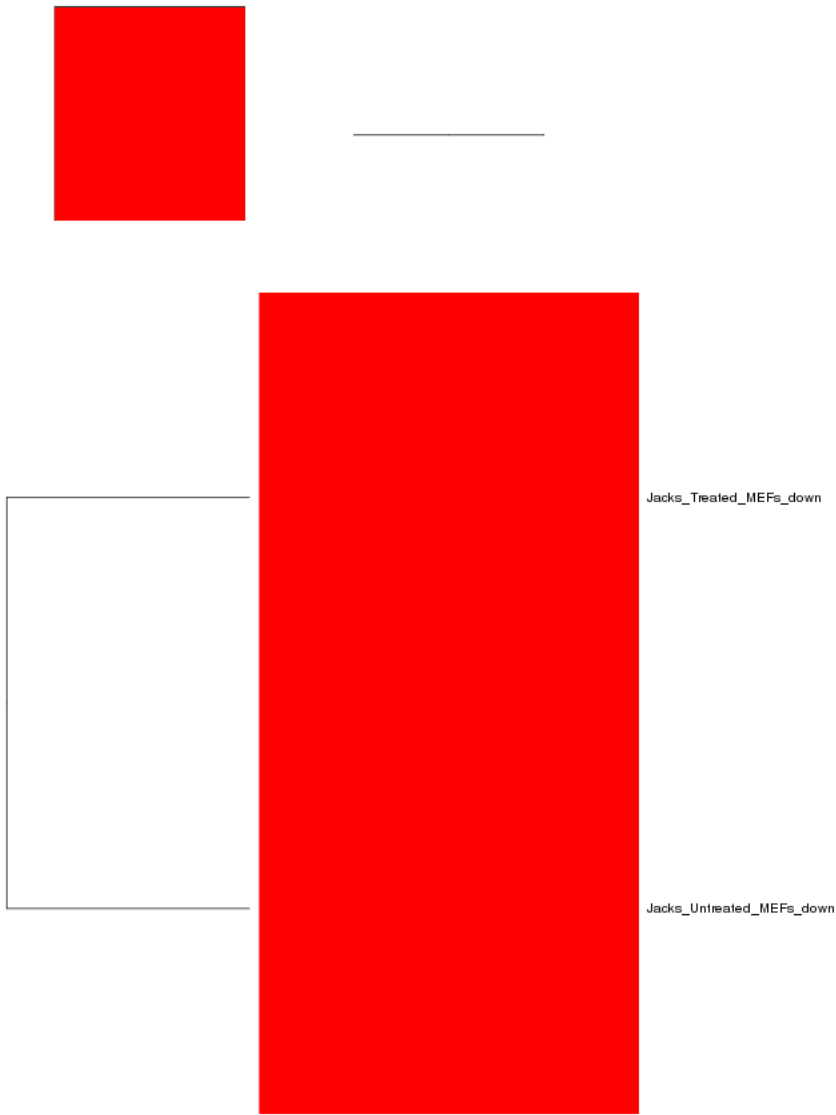

Jacks zscore

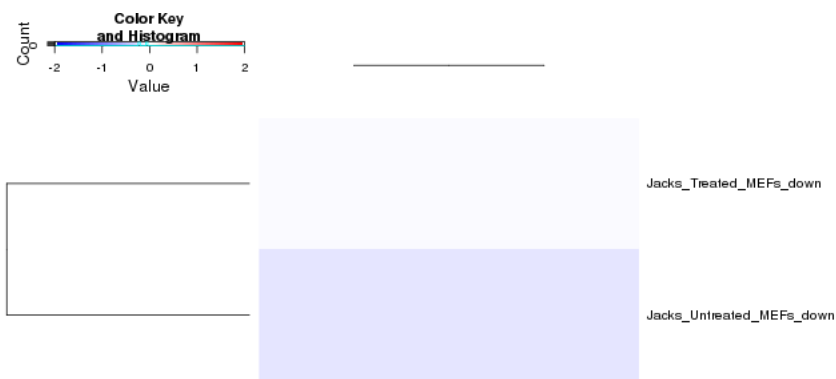

## GO enrichment

Cluster profiler used to call enrichments of significantly differentially regulated genes that map to Entrez IDs.

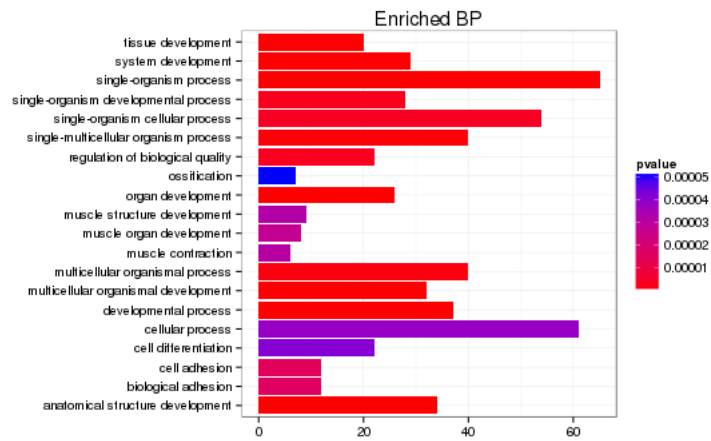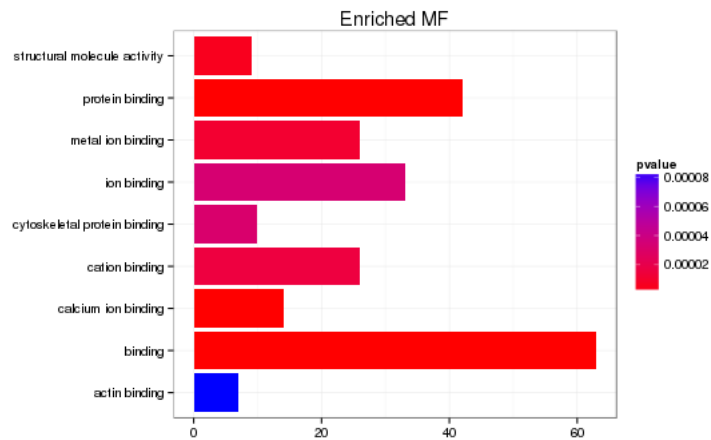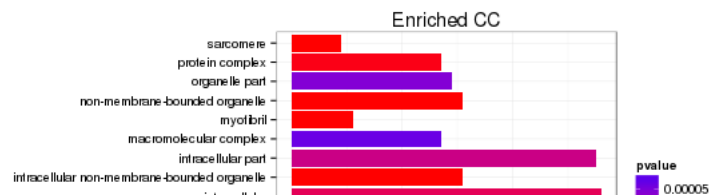

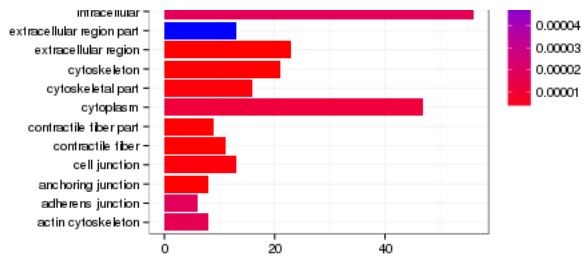

```
## Error in unit(tic_pos.c, "mm"): 'x' and 'units' must have length > 0
```

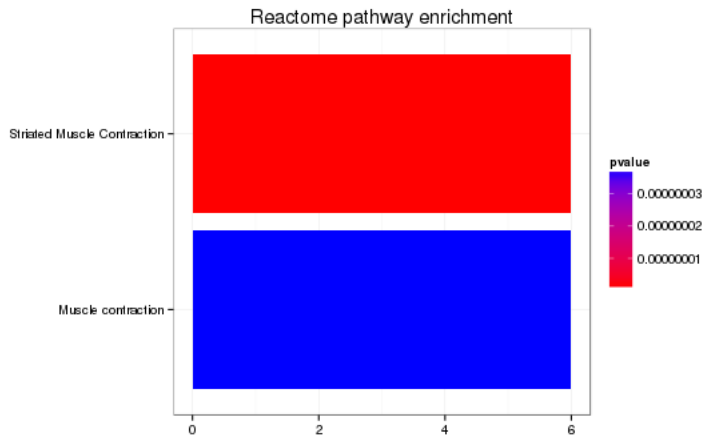

## Cis vs Trans (locally)

log2 Foldchange and test statistic are calculated with the ratio of fpkm(KO)/fpkm(WT), thus the test\_stat is positive if a gene is higher in the KO and negative if a gene has lower expression in the KO

The pvalue for genes significantly regulated in a region this size is: 0.02

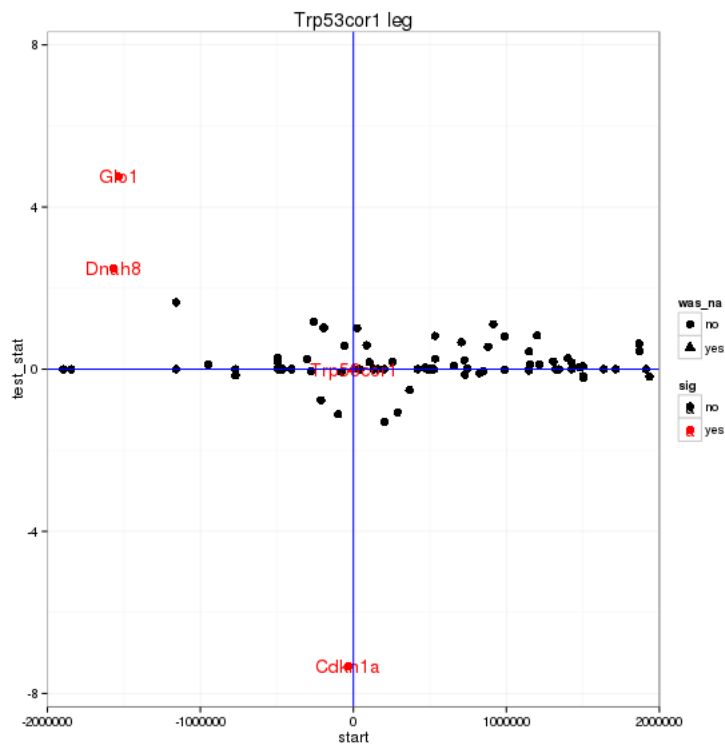

# Notes

## Samples used are:

11

- 1 JR878
- 2 JR880
- 3 JR881
- 4 JR882
- 5 JR883
- 6 lincp21\_Leg\_KO4

## Replicates

| file                                                                                           | sample_name | replicate | rep_name    | total_mass  | norm_mass   | ir |
|------------------------------------------------------------------------------------------------|-------------|-----------|-------------|-------------|-------------|----|
| 1 /n/rinn_data1/users/agroff/seq/OtherMice/Diana/lincP21/quants/JR878/abundances.cxb           | WT          | 0         | WT_0        | 48224900.00 | 44016600.00 |    |
| 2 /n/rinn_data1/users/agroff/seq/OtherMice/Diana/lincP21/quants/JR880/abundances.cxb           | WT          | 1         | WT_1        | 52725300.00 | 44016600.00 |    |
| 3 /n/rinn_data1/users/agroff/seq/OtherMice/Diana/lincP21/quants/JR881/abundances.cxb           | WT          | 2         | WT_2        | 43230900.00 | 44016600.00 |    |
| 4 /n/rinn_data1/users/agroff/seq/OtherMice/Diana/lincP21/quants/JR882/abundances.cxb           | Trp53cor1   | 0         | Trp53cor1_0 | 61630100.00 | 44016600.00 |    |
| 5 /n/rinn_data1/users/agroff/seq/OtherMice/Diana/lincP21/quants/JR883/abundances.cxb           | Trp53cor1   | 1         | Trp53cor1_1 | 53017900.00 | 44016600.00 |    |
| 6 /n/rinn_data1/users/agroff/seq/OtherMice/Diana/lincP21/quants/lincp21_Leg_KO4/abundances.cxb | Trp53cor1   | 2         | Trp53cor1_2 | 20607100.00 | 44016600.00 |    |

## Session Info

```
## R version 3.0.2 (2013-09-25)
## Platform: x86_64-unknown-linux-gnu (64-bit)
##
## locale:
## [1] LC_CTYPE=en_US.UTF-8      LC_NUMERIC=C
## [3] LC_TIME=en_US.UTF-8      LC_COLLATE=en_US.UTF-8
## [5] LC_MONETARY=en_US.UTF-8  LC_MESSAGES=en_US.UTF-8
## [7] LC_PAPER=en_US.UTF-8     LC_NAME=C
## [9] LC_ADDRESS=C             LC_TELEPHONE=C
## [11] LC_MEASUREMENT=en_US.UTF-8 LC_IDENTIFICATION=C
##
## attached base packages:
## [1] grid      parallel  methods  stats      graphics  grDevices  utils
## [8] datasets  base
##
## other attached packages:
## [1] plyr_1.8.1
## [2] stringr_0.6.2
## [3] seqbias_1.10.0
## [4] BSgenome.Mmusculus.UCSC.mm10_1.3.19
## [5] BSgenome_1.30.0
## [6] Biostrings_2.30.1
## [7] GO.db_2.10.1
## [8] org.Mm.eg.db_2.10.1
## [9] clusterProfiler_1.13.1
## [10] DOSE_2.0.0
## [11] ReactomePA_1.6.1
## [12] AnnotationDbi_1.24.0
## [13] Biobase_2.22.0
## [14] mgcv_1.8-2
## [15] nlme_3.1-117
## [16] RMySQL_0.9-3
## [17] RColorBrewer_1.0-5
## [18] gridExtra_0.9.1
## [19] gtable_0.1.2
## [20] marray_1.40.0
## [21] gplots_2.14.2
## [22] GSA_1.03
## [23] limma_3.18.13
## [24] xtable_1.7-3
## [25] cummeRbund_2.7.2
```

```

## [26] Gviz_1.6.0
## [27] rtracklayer_1.22.7
## [28] GenomicRanges_1.14.4
## [29] XVector_0.2.0
## [30] IRanges_1.20.7
## [31] fastcluster_1.1.13
## [32] reshape2_1.4
## [33] ggplot2_1.0.0
## [34] RSQLite_0.11.4
## [35] DBI_0.3.1
## [36] BiocGenerics_0.8.0
## [37] knitr_1.7
##
## Loaded via a namespace (and not attached):
## [1] biomart_2.18.0      biovizBase_1.10.8  bitops_1.0-6
## [4] caTools_1.17.1     cluster_1.15.2     colorspace_1.2-4
## [7] dichromat_2.0-0    digest_0.6.4       DO.db_2.7
## [10] evaluate_0.5.5     formatR_1.0        Formula_1.1-2
## [13] gdata_2.13.3       GenomicFeatures_1.14.5 GOsemSim_1.20.3
## [16] graph_1.40.1       graphite_1.8.1     gtools_3.4.1
## [19] Hmisc_3.14-4       igraph_0.7.1       KEGG.db_2.10.1
## [22] KernSmooth_2.23-12 labeling_0.2        lattice_0.20-29
## [25] latticeExtra_0.6-26 MASS_7.3-33        Matrix_1.1-4
## [28] munsell_0.4.2      org.Hs.eg.db_2.10.1 proto_0.3-10
## [31] qvalue_1.36.0      Rcpp_0.11.3        RCurl_1.95-4.3
## [34] reactome.db_1.46.1 Rsamtools_1.14.3   scales_0.2.4
## [37] splines_3.0.2      stats4_3.0.2       survival_2.37-7
## [40] tcltk_3.0.2        tools_3.0.2        XML_3.98-1.1
## [43] zlibbioc_1.8.0

```

## Run Info

```

##      param
## 1  cmd_line
## 2  version
## 3  SVN_revision
## 4  boost_version
## 5  genome
##
## 1 cuffdiff -p 10 -L WT,Trp53cor1 -o /n/rinn_data1/users/agroff/seq/OtherMice/Diana/lincP21/diff/Trp53cor1_E14.5_
## 2
## 3
## 4
## 5

```

# Trp53cor1 KO vs WT (liver)

This file shows the wt-v-ko comparison for Trp53cor1.

Cuff overview:

```
## CuffSet instance with:  
## 2 samples  
## 26754 genes  
## 77524 isoforms  
## 0 TSS  
## 23066 CDS  
## 0 promoters  
## 0 splicing  
## 19954 relCDS
```

## QC

### Dispersion

Dispersion plot for genes in cuff: (Overdispersion can lead to inaccurate quants)

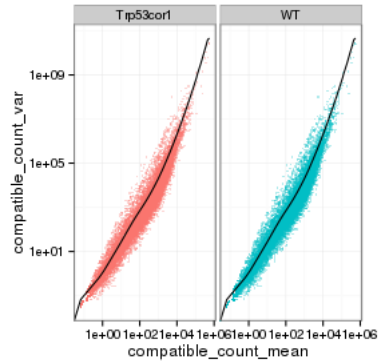

### Cross-replicate variability (fpkmSCVplot)

Differences in CV 2 can result in lower numbers of differentially expressed genes due to a higher degree of variability between replicate fpkm estimates.

Genes:

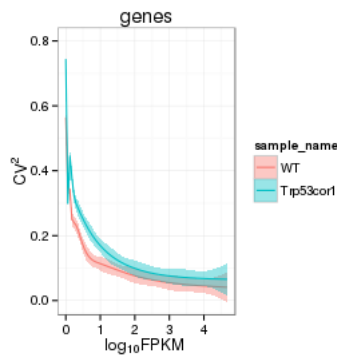

Isoforms:



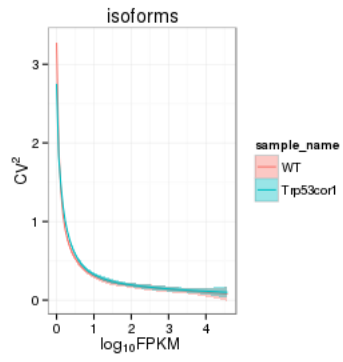

## MvA plot

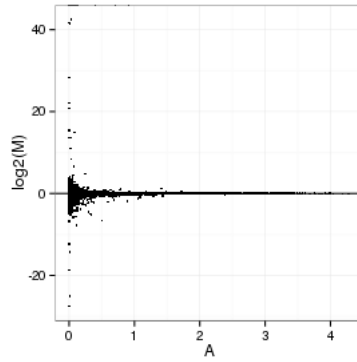

## MvA plot counts

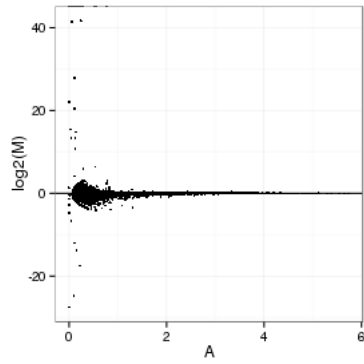

## Scatterplot matrix

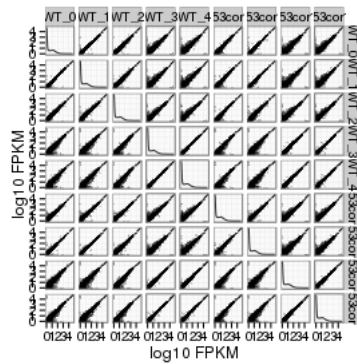

# Distributions

## Boxplots

Boxplot (genes)

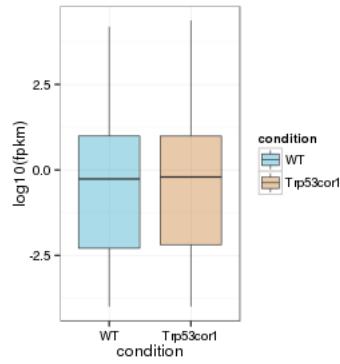

Boxplot (genes, replicates)

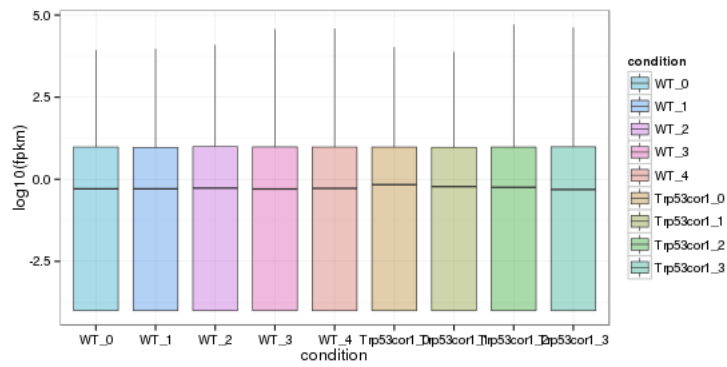

Boxplot (isoforms)

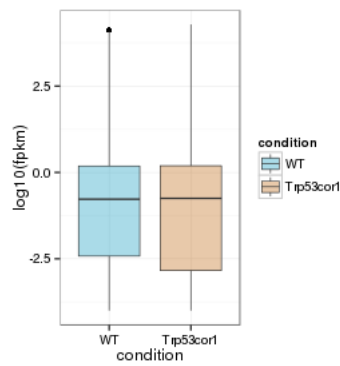

Boxplot (isoforms, replicates)

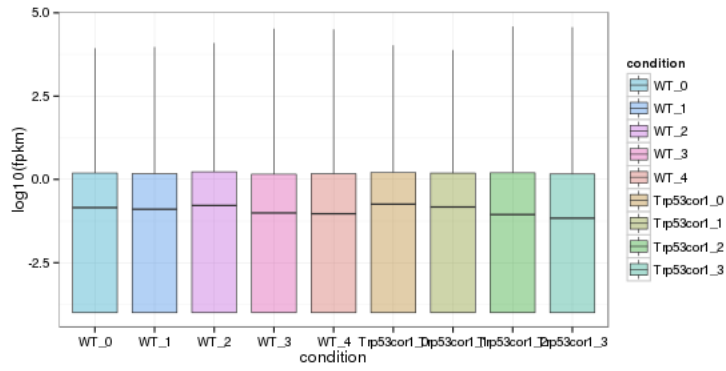

## Density

Density (genes)

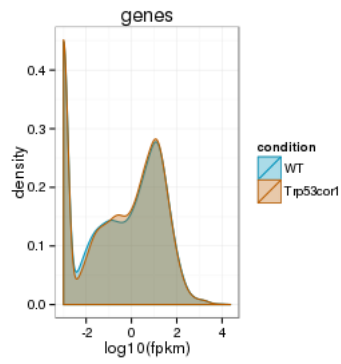

Density (genes, replicates)

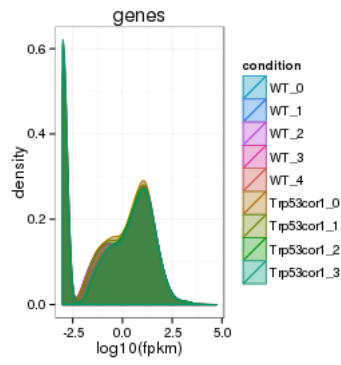

## Clustering

Replicate Clusters

### All genes(cuff)

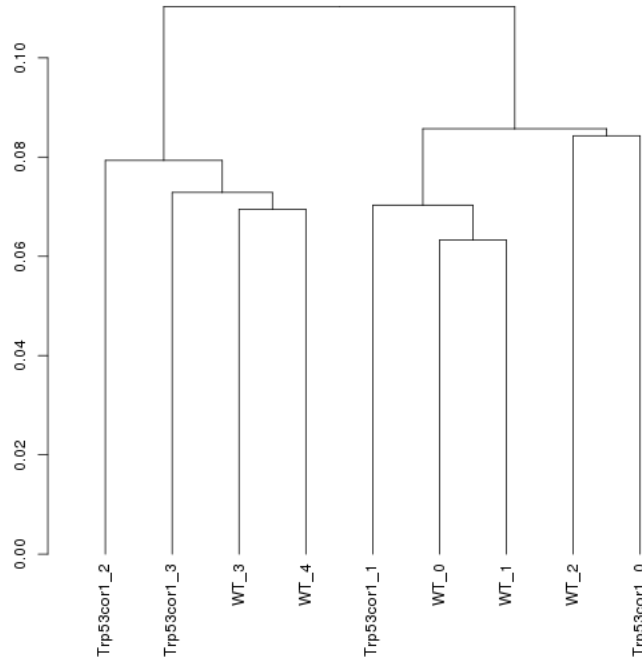

## NULL

### PCA (genes)

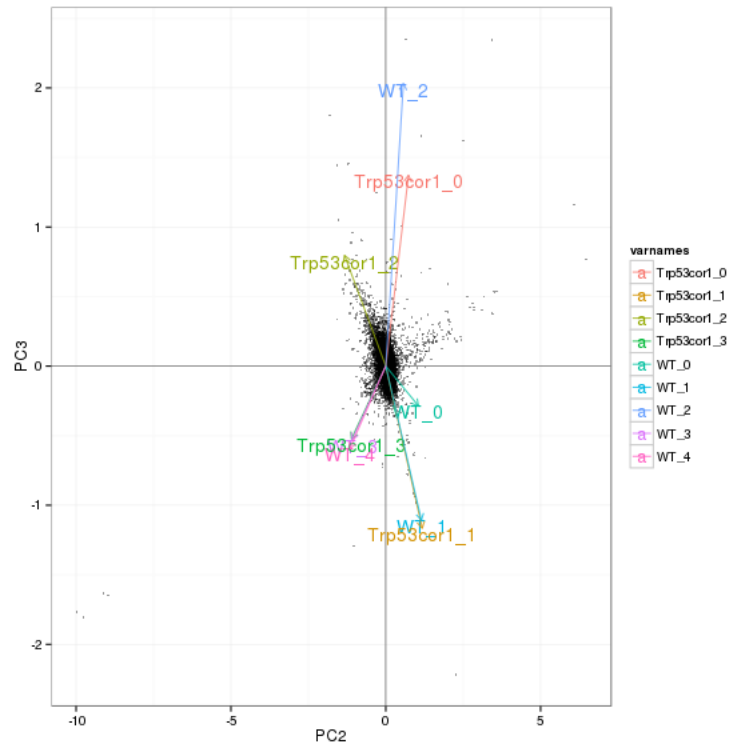

### MDS (genes)

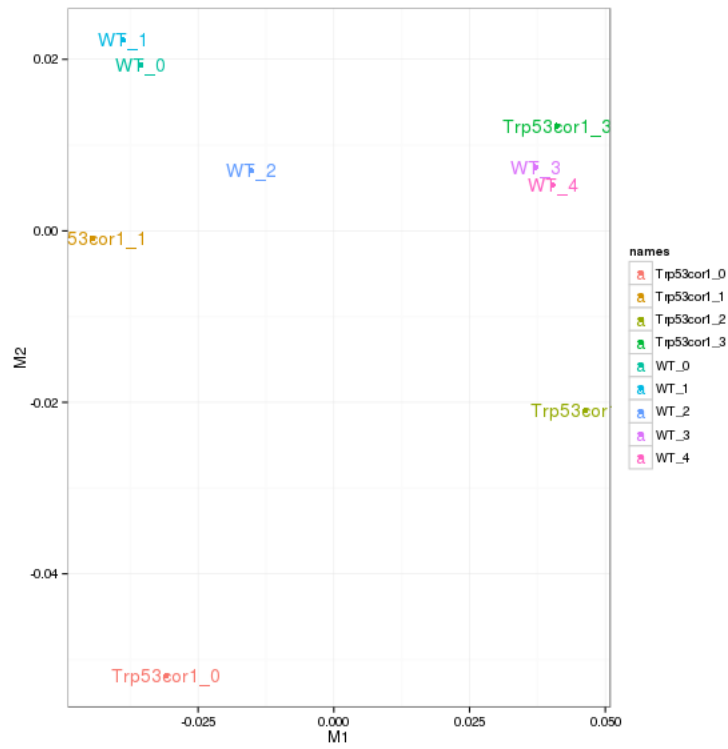

## KO assessment

### Endogenous IncRNA expression

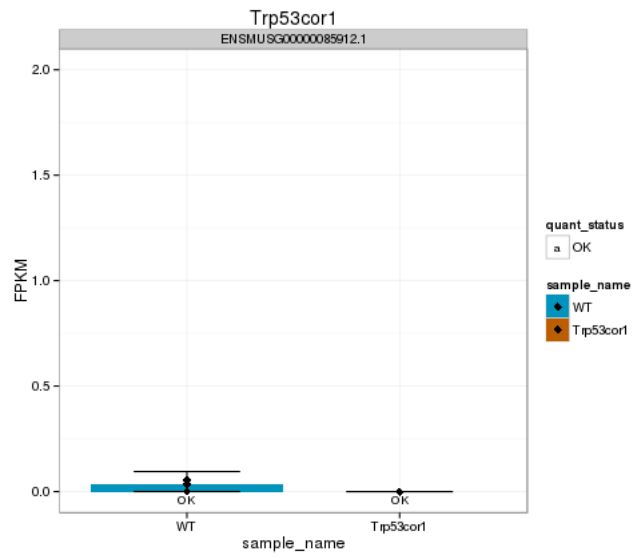

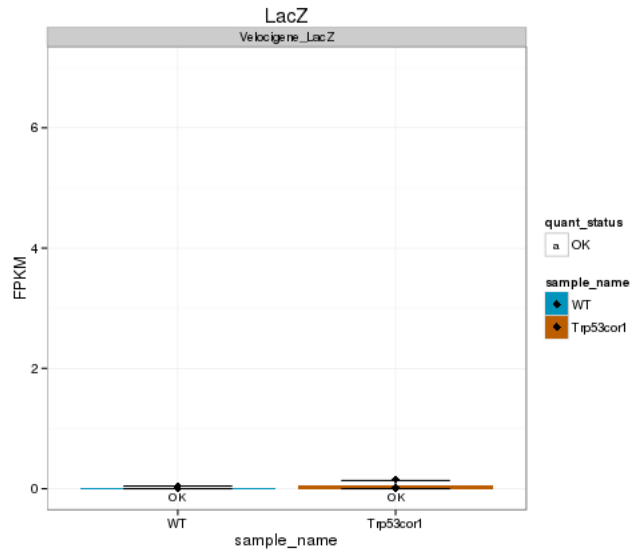

## Digital Genotyping (LacZ vs Endogenous lincRNA and Sex)

Eif2s3y is a y-expressed gene, Xist is an x-expressed gene Expression plot (endogenous linc, lacZ, Y-expressed gene):

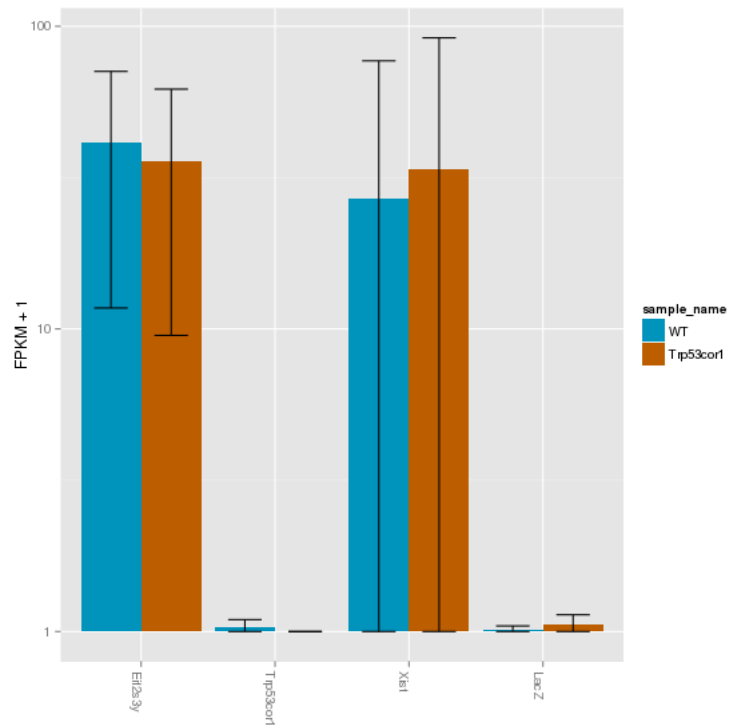

Expression heatmap:

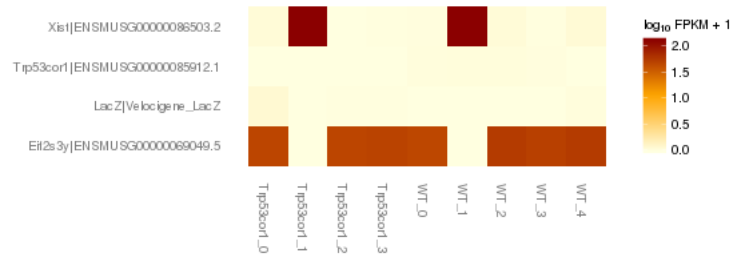

## Track visualization

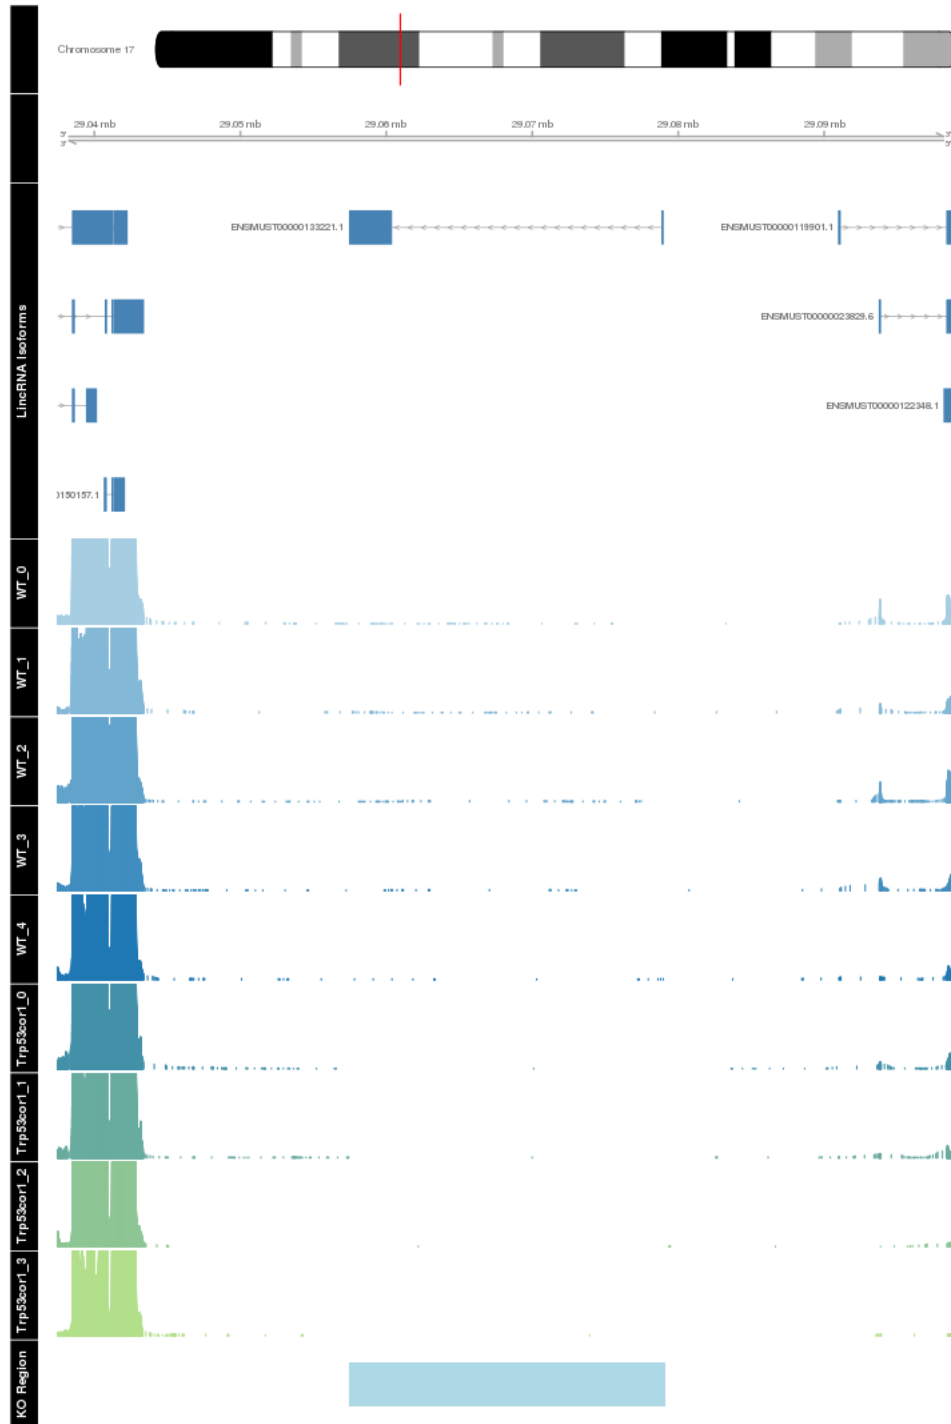

## Differential Analysis

### Differential Genes

There are 58 significantly differentially expressed genes. They are:

**geneAnnot\$gene\_short\_name**

- 1 Cnn1
- 2 Ier3
- 3 Cmah
- 4 Sulf1
- 5 Myh11
- 6 Arg1



7 Adamdec1  
8 Slc15a2  
9 Cdkn1a  
10 Cldn6  
11 Polh  
12 Enpp4  
13 Tspo2  
14 Glo1  
15 E4f1  
16 Meiob  
17 Ifi140  
18 Clips  
19 Igfbp5  
20 Cfh  
21 Ifi202b  
22 Hao1  
23 Stmn2  
24 Spp1  
25 Sparcl1  
26 Col1a2  
27 Ctrb1  
28 Akr1c14  
29 Cfhr2  
30 Hsd17b13  
31 Rnps1  
32 Acta2  
33 3110052M02Rik  
34 Azgp1  
35 Cyp3a16  
36 Igfbp2  
37 Myh6  
38 Pgm5  
39 Trem1  
40 Unc5cl  
41 Epcam  
42 Slitrk6  
43 Hmga1  
44 Gm4737  
45 H2-T24  
46 Krt15  
47 Cpa1  
48 Fxyd3  
49 Actg2  
50 Kng2  
51 Krt5  
52 Mocs1  
53 Zfp948  
54 Zfp213  
55 Cpa2  
56 Hmga1-rs1  
57 Rps2-ps10  
58 Gm9825

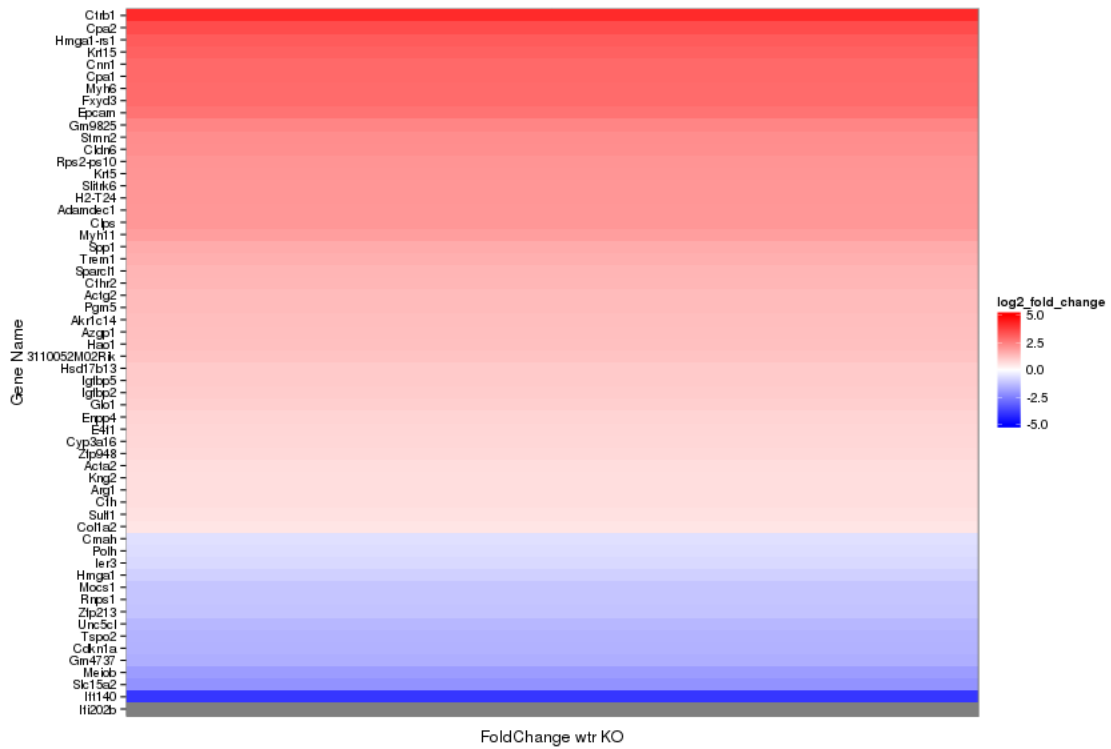

Expression heatmap of sigGenes

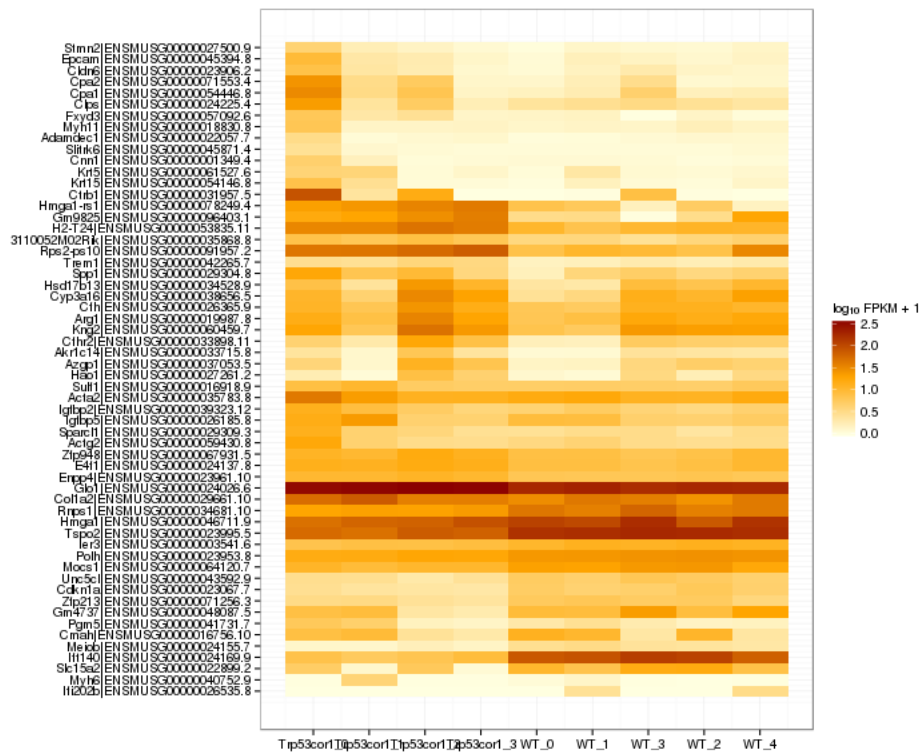

Foldchange heatmap of sigGenes

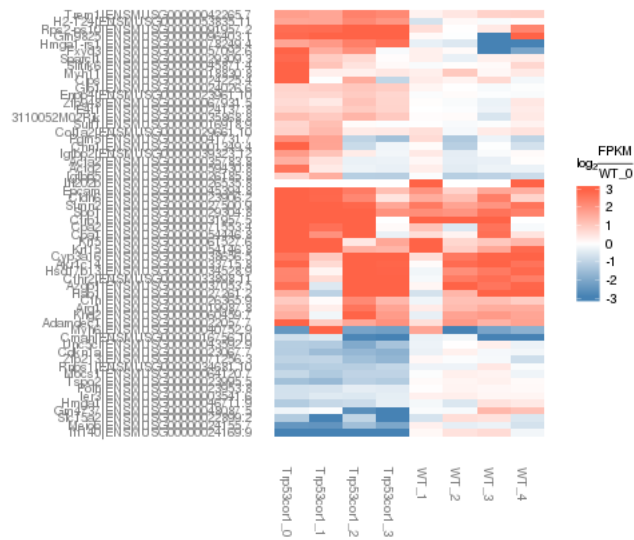

```
## Error in (function (classes, fdef, mtable) : unable to find an inherited method for function 'csFoldChangeHeatm
```

```
## Error in sqliteExecStatement(con, statement, bind.data): RS-DBI driver: (error in statement: near ")": syntax er
```

### Expression-level/significance relationship

Scatter plot of significant genes only:

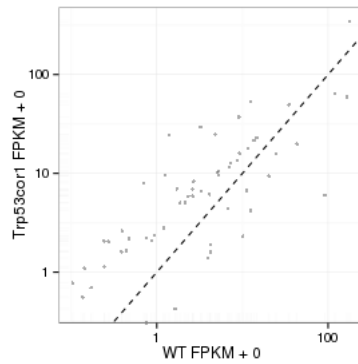

Volcano Plot

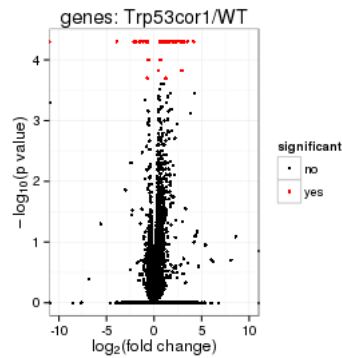

Volcano plot with significant genes only:

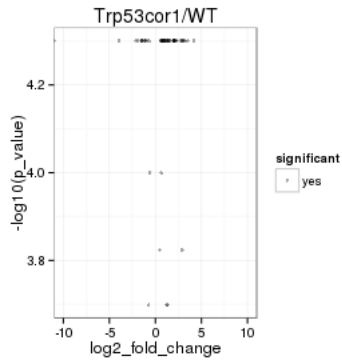

## Gene/Pathway Analysis

##

Enrichment and zscores are calculated based on expression in KO vs WT (fpkmKO/fpkmWT), so genes that are down regulated in KO are shown in blue, while upregulation is shown in red.

KO/WT Blue = down in KO Red = Up in KO

Biocarta enrichment:

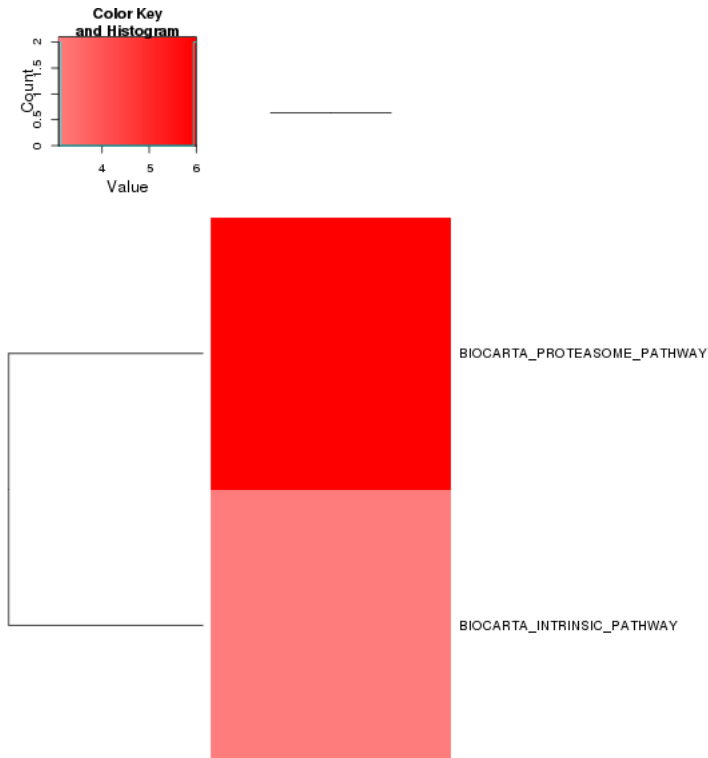

Biocarta zscore:

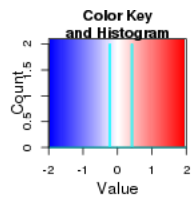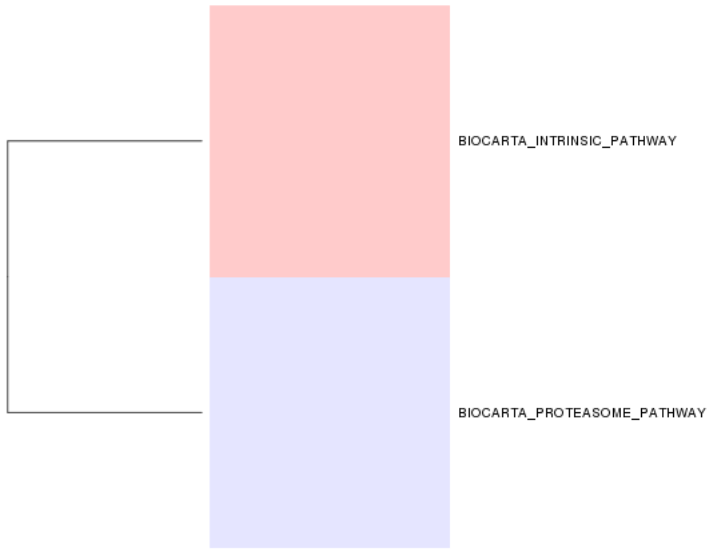

Reactome enrichment:

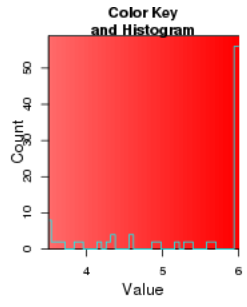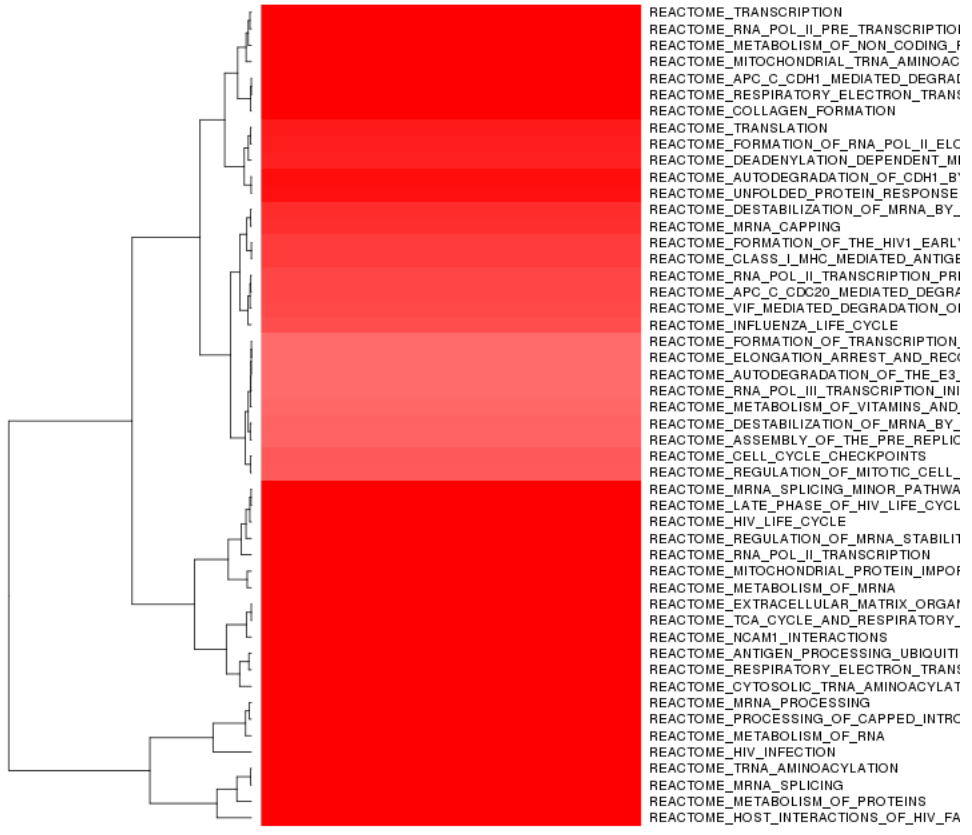

Reactome zscore:

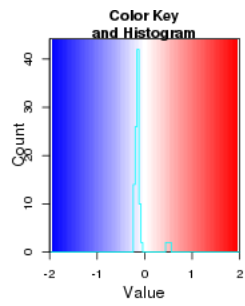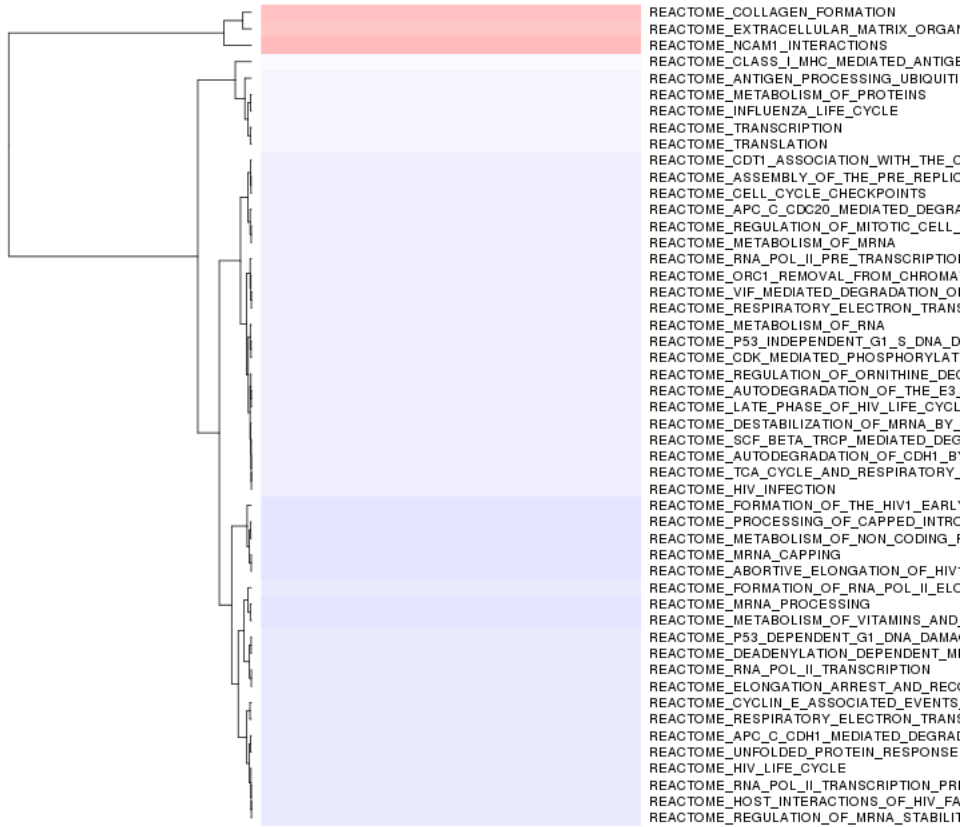

Kegg enrichment:

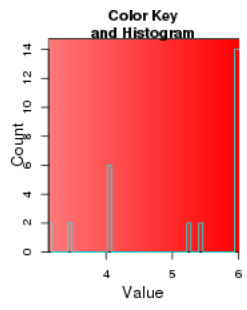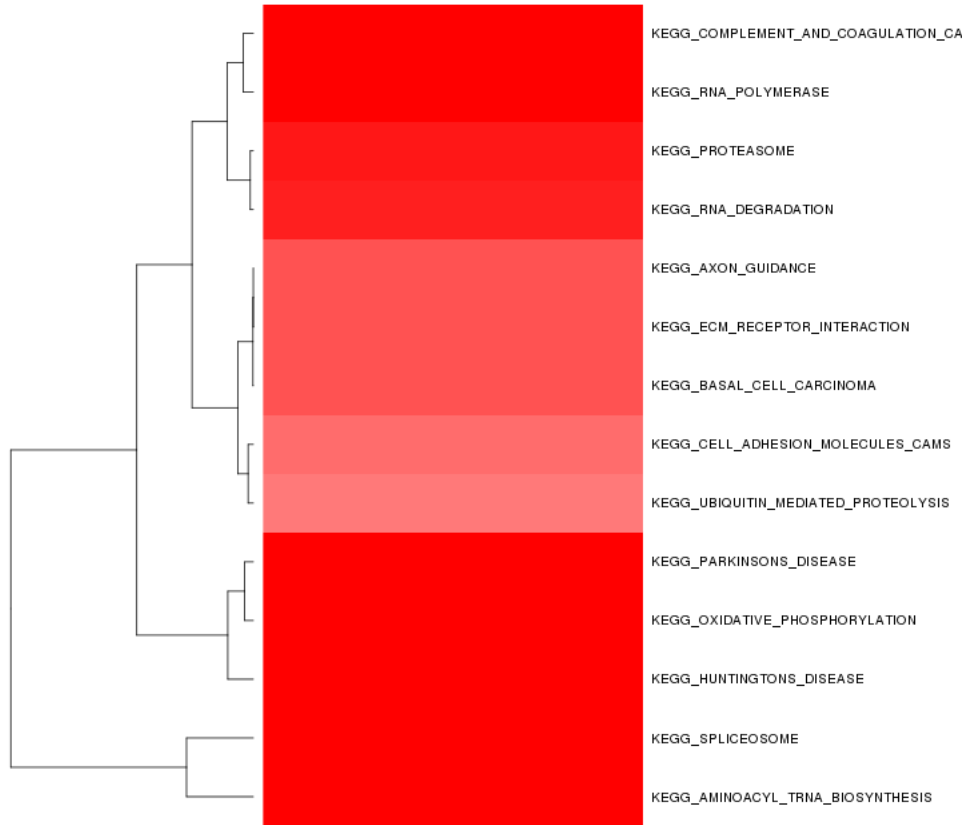

Kegg zscore:



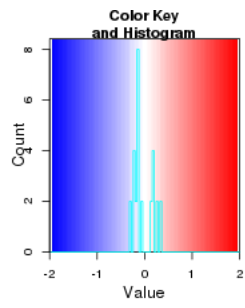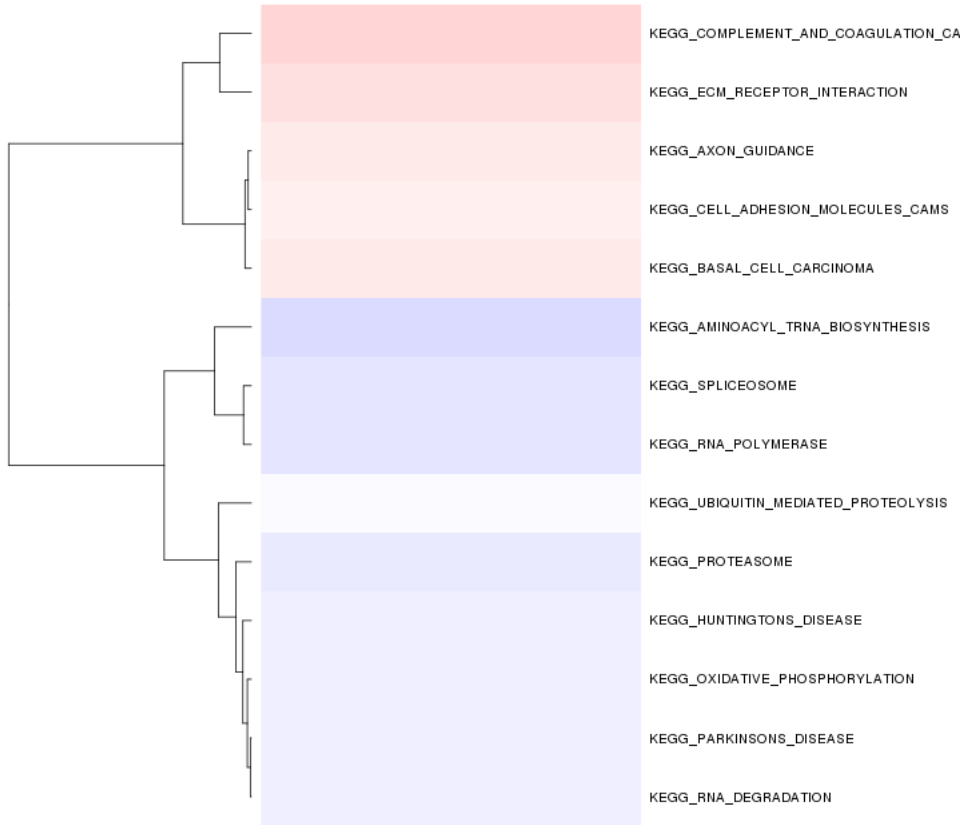

p53 enrichment:

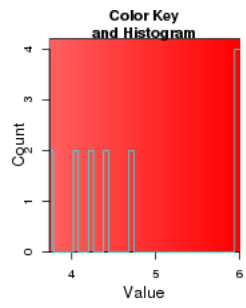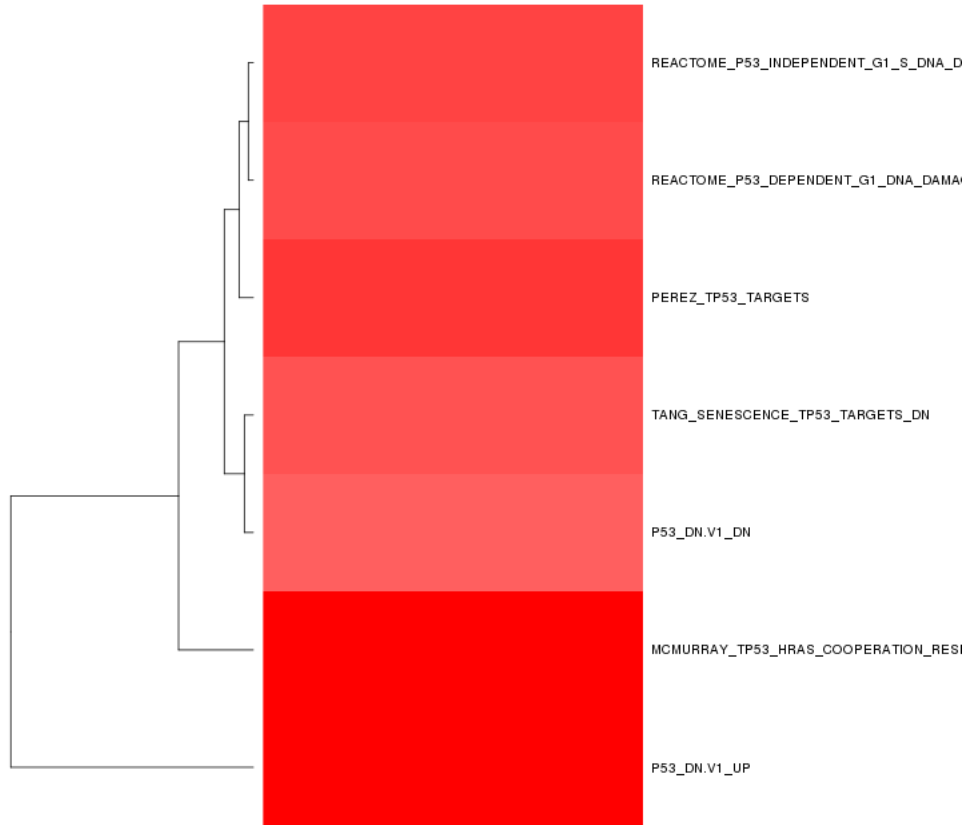

p53 zscore:

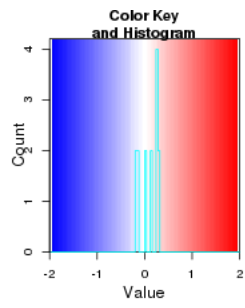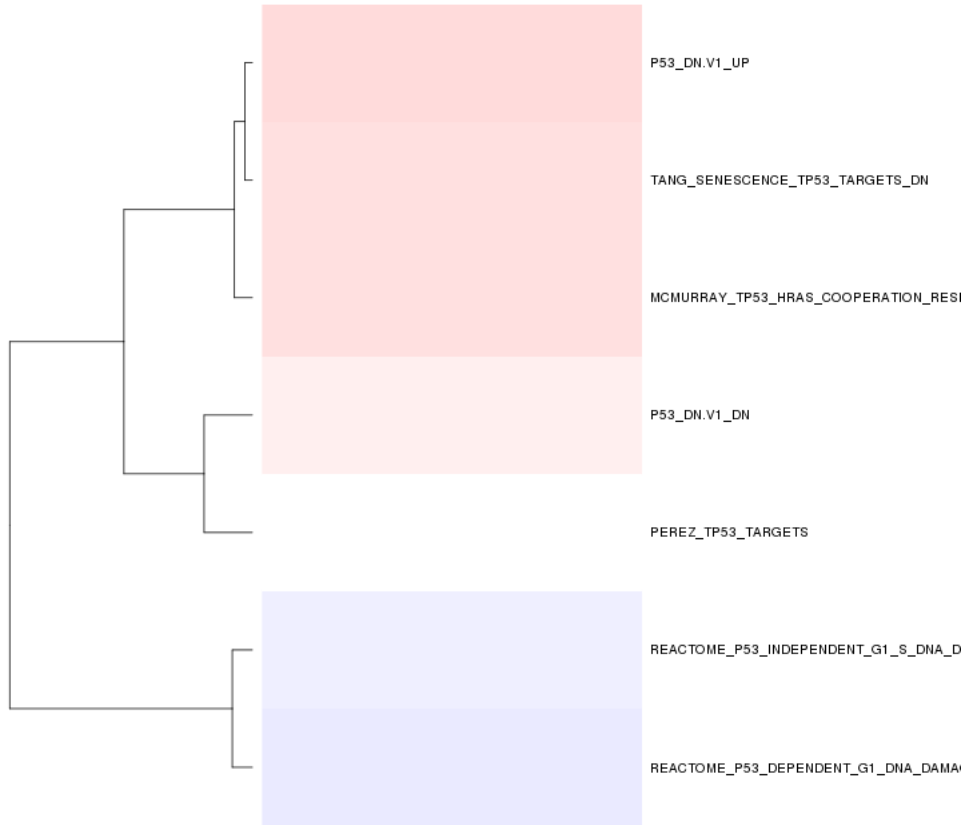

Oncogene enrichment:

```
## Error in x_ordered[1:50, ]: subscript out of bounds
```

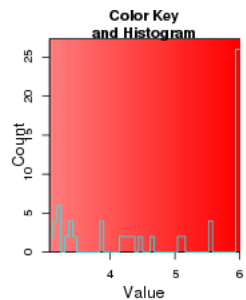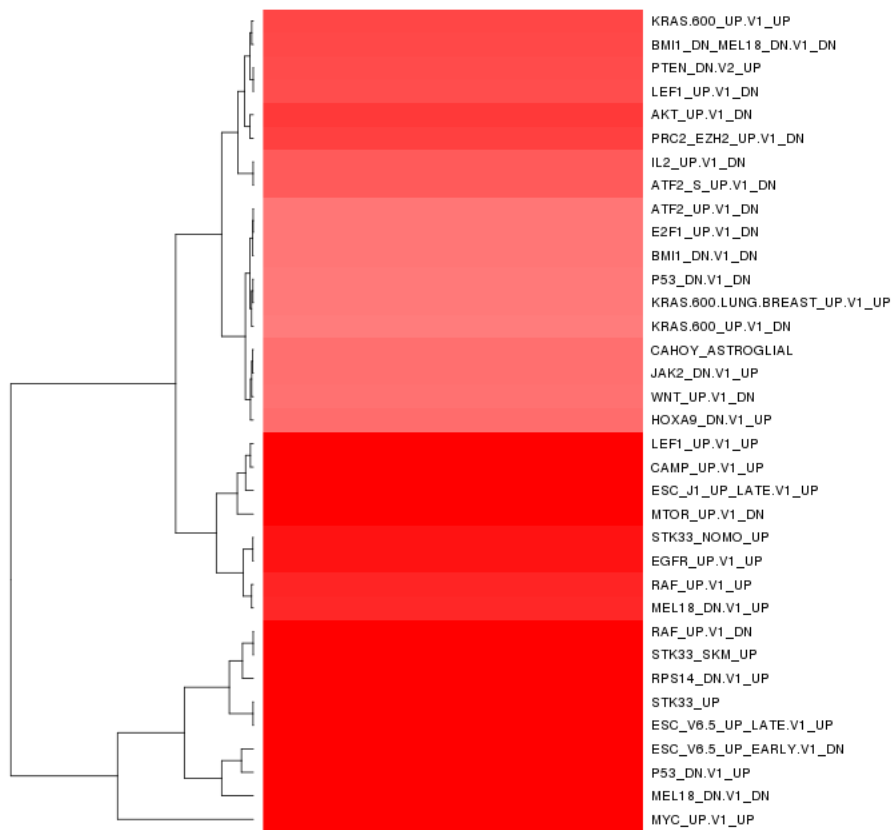

Oncogene zscore:

```
## Error in x_ordered[1:50, ]: subscript out of bounds
```

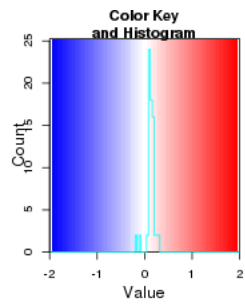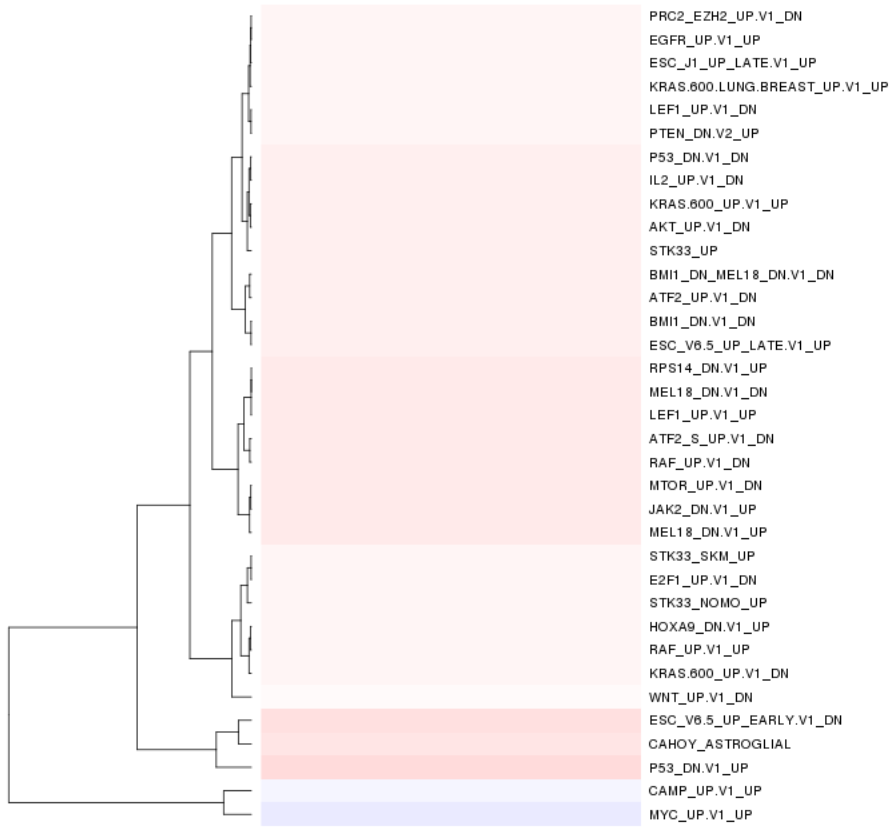

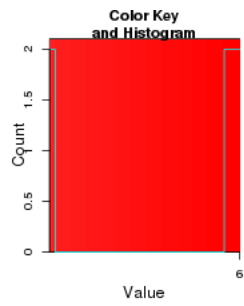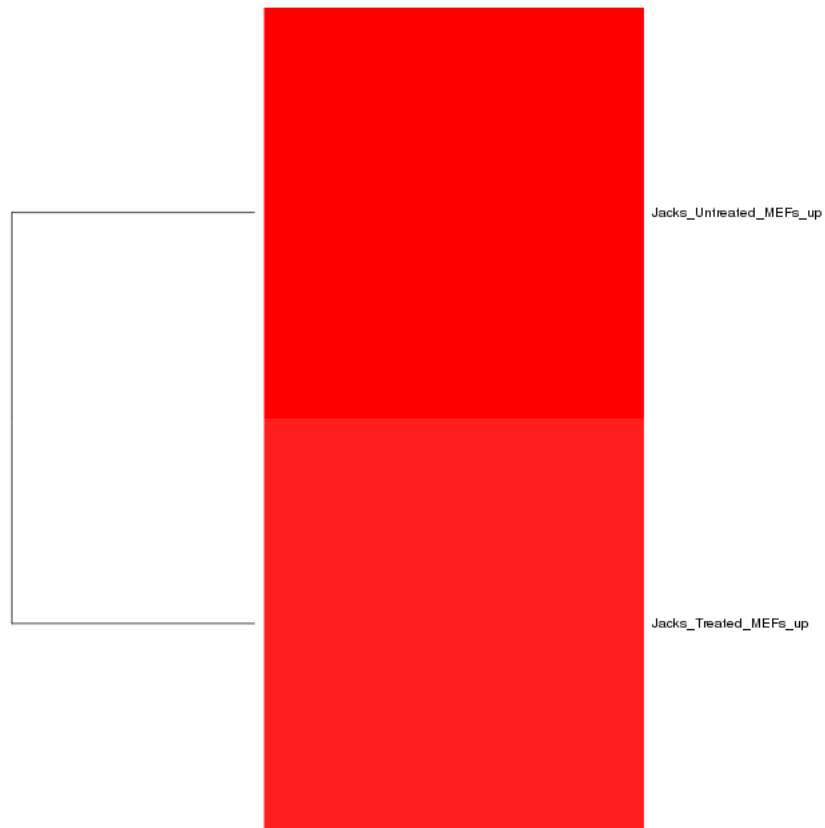

Jacks enrichment

Jacks zscore

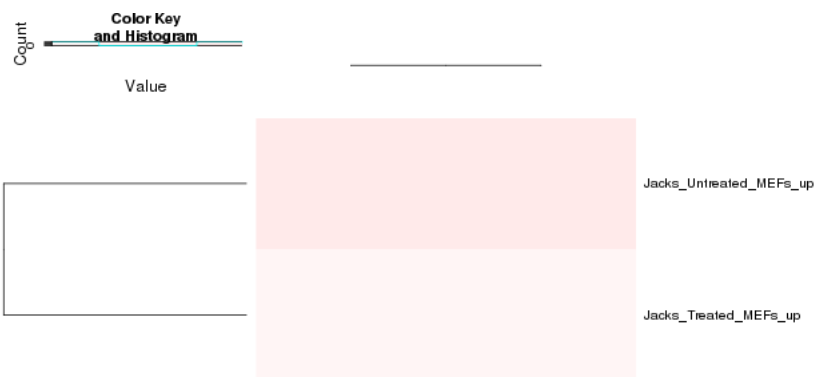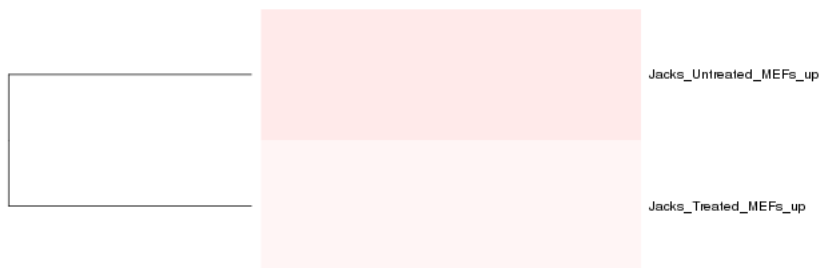

## GO enrichment

Cluster profiler used to call enrichments of significantly differentially regulated genes that map to Entrez IDs.

```
## Error in unit(tic_pos.c, "mm"): 'x' and 'units' must have length > 0
```

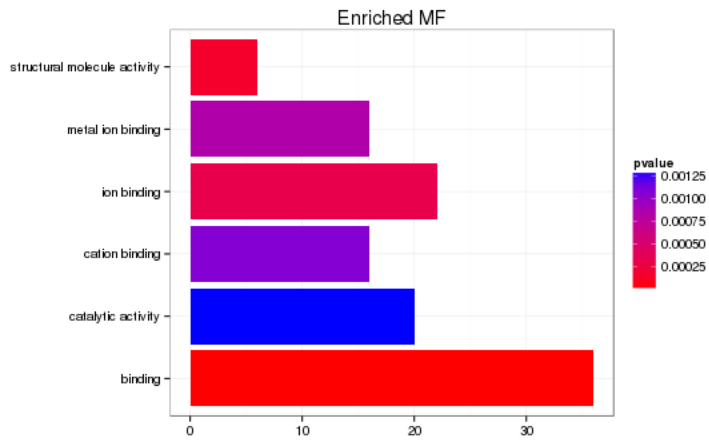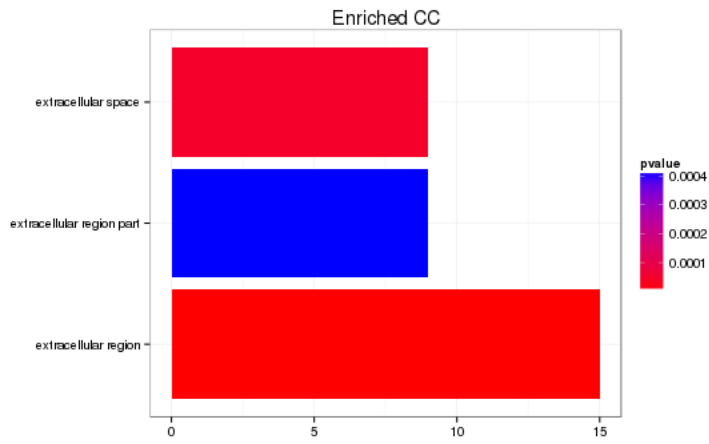

```
## Error in plot.window(...): need finite 'xlim' values
```

```
## Error in unit(tic_pos.c, "mm"): 'x' and 'units' must have length > 0
```

## Cis vs Trans (locally)

log<sub>2</sub> Foldchange and test statistic are calculated with the ratio of fpkm(KO)/fpkm(WT), thus the test\_stat is positive if a gene is higher in the KO and negative if a gene has lower expression in the KO

The pvalue for genes significantly regulated in a region this size is: 0.0099

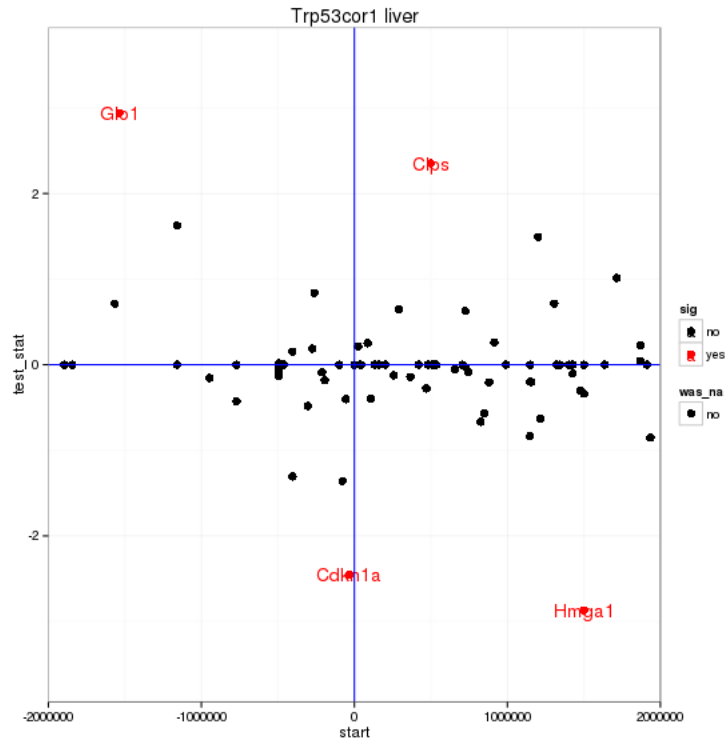

## Notes

Samples used are:

11

- 1 JR917
- 2 JR933
- 3 JR925
- 4 lincp21\_Liver\_WT1
- 5 lincp21\_Liver\_WT2
- 6 JR926
- 7 JR934
- 8 lincp21\_Liver\_KO1
- 9 lincp21\_Liver\_KO2

## Replicates

| file                                                                                             | sample_name | replicate | rep_name    | total_mass  | norm_mass   | i |
|--------------------------------------------------------------------------------------------------|-------------|-----------|-------------|-------------|-------------|---|
| 1 /n/rinn_data1/users/agroff/seq/OtherMice/Diana/lincP21/quants/JR917/abundances.cxb             | WT          | 0         | WT_0        | 37248000.00 | 26534800.00 |   |
| 2 /n/rinn_data1/users/agroff/seq/OtherMice/Diana/lincP21/quants/JR933/abundances.cxb             | WT          | 1         | WT_1        | 34229100.00 | 26534800.00 |   |
| 3 /n/rinn_data1/users/agroff/seq/OtherMice/Diana/lincP21/quants/JR925/abundances.cxb             | WT          | 2         | WT_2        | 40066200.00 | 26534800.00 |   |
| 4 /n/rinn_data1/users/agroff/seq/OtherMice/Diana/lincP21/quants/lincp21_Liver_WT1/abundances.cxb | WT          | 3         | WT_3        | 22564500.00 | 26534800.00 |   |
| 5 /n/rinn_data1/users/agroff/seq/OtherMice/Diana/lincP21/quants/lincp21_Liver_WT2/abundances.cxb | WT          | 4         | WT_4        | 17810700.00 | 26534800.00 |   |
| 6 /n/rinn_data1/users/agroff/seq/OtherMice/Diana/lincP21/quants/JR926/abundances.cxb             | Trp53cor1   | 0         | Trp53cor1_0 | 40299500.00 | 26534800.00 |   |
| 7 /n/rinn_data1/users/agroff/seq/OtherMice/Diana/lincP21/quants/JR934/abundances.cxb             | Trp53cor1   | 1         | Trp53cor1_1 | 30681900.00 | 26534800.00 |   |
| 8 /n/rinn_data1/users/agroff/seq/OtherMice/Diana/lincP21/quants/lincp21_Liver_KO1/abundances.cxb | Trp53cor1   | 2         | Trp53cor1_2 | 15729200.00 | 26534800.00 |   |
| 9 /n/rinn_data1/users/agroff/seq/OtherMice/Diana/lincP21/quants/lincp21_Liver_KO2/abundances.cxb | Trp53cor1   | 3         | Trp53cor1_3 | 16292900.00 | 26534800.00 |   |

## Session Info

```
## R version 3.0.2 (2013-09-25)
## Platform: x86_64-unknown-linux-gnu (64-bit)
##
## locale:
```



```

## [1] LC_CTYPE=en_US.UTF-8      LC_NUMERIC=C
## [3] LC_TIME=en_US.UTF-8         LC_COLLATE=en_US.UTF-8
## [5] LC_MONETARY=en_US.UTF-8     LC_MESSAGES=en_US.UTF-8
## [7] LC_PAPER=en_US.UTF-8       LC_NAME=C
## [9] LC_ADDRESS=C               LC_TELEPHONE=C
## [11] LC_MEASUREMENT=en_US.UTF-8 LC_IDENTIFICATION=C
##
## attached base packages:
## [1] grid      parallel  methods  stats    graphics  grDevices  utils
## [8] datasets  base
##
## other attached packages:
## [1] plyr_1.8.1
## [2] stringr_0.6.2
## [3] seqbias_1.10.0
## [4] BSgenome.Mmusculus.UCSC.mm10_1.3.19
## [5] BSgenome_1.30.0
## [6] Biostrings_2.30.1
## [7] GO.db_2.10.1
## [8] org.Mm.eg.db_2.10.1
## [9] clusterProfiler_1.13.1
## [10] DOSE_2.0.0
## [11] ReactomePA_1.6.1
## [12] AnnotationDbi_1.24.0
## [13] Biobase_2.22.0
## [14] mgcv_1.8-2
## [15] nlme_3.1-117
## [16] RMySQL_0.9-3
## [17] RColorBrewer_1.0-5
## [18] gridExtra_0.9.1
## [19] gtable_0.1.2
## [20] marray_1.40.0
## [21] ggplots_2.14.2
## [22] GSA_1.03
## [23] limma_3.18.13
## [24] xtable_1.7-3
## [25] cummeRbund_2.7.2
## [26] gviz_1.6.0
## [27] rtracklayer_1.22.7
## [28] GenomicRanges_1.14.4
## [29] XVector_0.2.0
## [30] IRanges_1.20.7
## [31] fastcluster_1.1.13
## [32] reshape2_1.4
## [33] ggplot2_1.0.0
## [34] RSQLite_0.11.4
## [35] DBI_0.3.1
## [36] BiocGenerics_0.8.0
## [37] knitr_1.7
##
## loaded via a namespace (and not attached):
## [1] biomaRt_2.18.0      biovizBase_1.10.8   bitops_1.0-6
## [4] caTools_1.17.1     cluster_1.15.2      colorspace_1.2-4
## [7] dichromat_2.0-0    digest_0.6.4        do.db_2.7
## [10] evaluate_0.5.5     formatR_1.0         Formula_1.1-2
## [13] gdata_2.13.3       GenomicFeatures_1.14.5 GOsemSim_1.20.3
## [16] graph_1.40.1       graphite_1.8.1      gtools_3.4.1
## [19] Hmisc_3.14-4       igraph_0.7.1        KEGG.db_2.10.1
## [22] kernSmooth_2.23-12 labeling_0.2         lattice_0.20-29
## [25] latticeExtra_0.6-26 MASS_7.3-33         Matrix_1.1-4
## [28] munSELL_0.4.2      org.Hs.eg.db_2.10.1 proto_0.3-10
## [31] qvalue_1.36.0      Rcpp_0.11.3         Rcurl_1.95-4.3
## [34] reactome.db_1.46.1 Rsamtools_1.14.3    scales_0.2.4
## [37] splines_3.0.2      stats4_3.0.2        survival_2.37-7
## [40] tcltk_3.0.2        tools_3.0.2         XML_3.98-1.1
## [43] zlibbioc_1.8.0

```

## Run Info

```
##      param
## 1    cmd_line
## 2      version
## 3  SVN_revision
## 4 boost_version
## 5      genome
##
## 1 cuffdiff -p 10 -L WT,Trp53cor1 -o /n/rinn_data1/users/agroff/seq/OtherMice/Diana/lincP21/diff/Trp53cor1_E14.5_
## 2
## 3
## 4
## 5
```

# Trp53cor1 KO vs WT (lung)

This file shows the wt-v-ko comparison for Trp53cor1.

Cuff overview:

```
## CuffSet instance with:  
## 2 samples  
## 26754 genes  
## 77524 isoforms  
## 0 TSS  
## 23066 CDS  
## 0 promoters  
## 0 splicing  
## 19954 relCDS
```

## QC

### Dispersion

Dispersion plot for genes in cuff: (Overdispersion can lead to inaccurate quants)

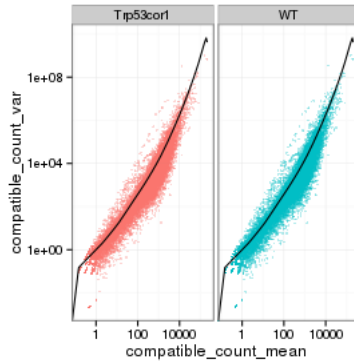

### Cross-replicate variability (fpkmSCVplot)

Differences in CV 2 can result in lower numbers of differentially expressed genes due to a higher degree of variability between replicate fpkm estimates.

Genes:

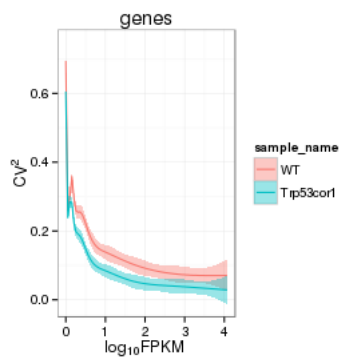

Isoforms:

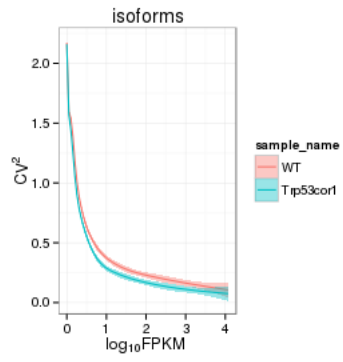

## MvA plot

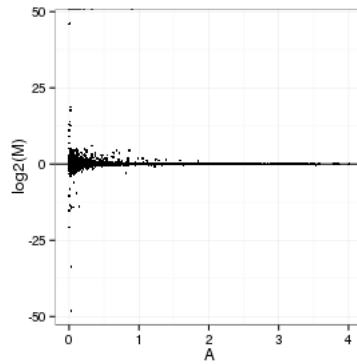

## MvA plot counts

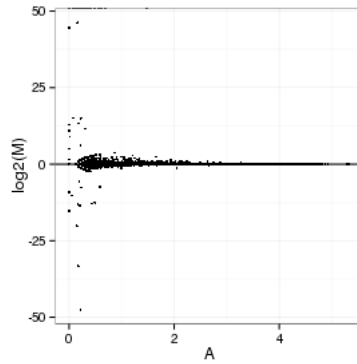

## Scatterplot matrix

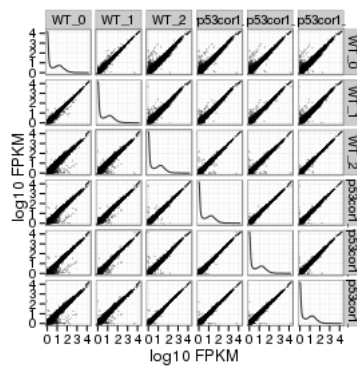

# Distributions

## Boxplots

Boxplot (genes)

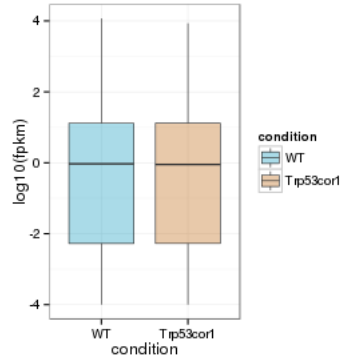

Boxplot (genes, replicates)

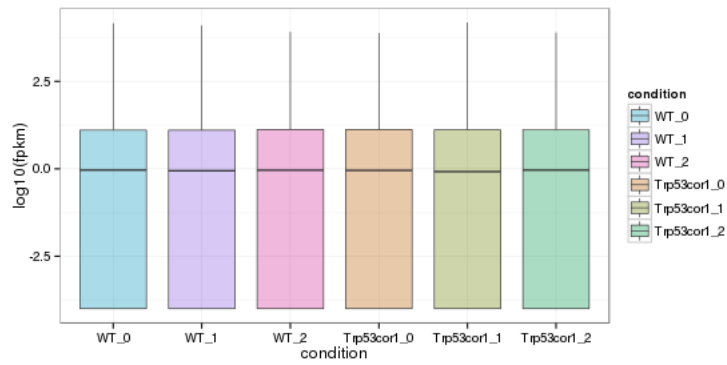

Boxplot (isoforms)

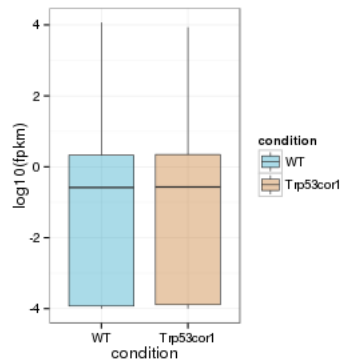

Boxplot (isoforms, replicates)

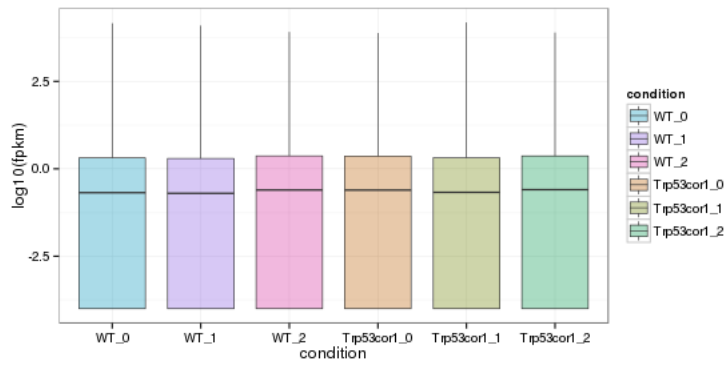

## Density

Density (genes)

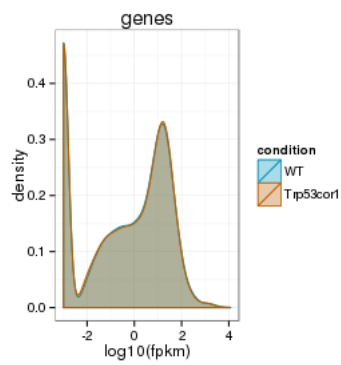

Density (genes, replicates)

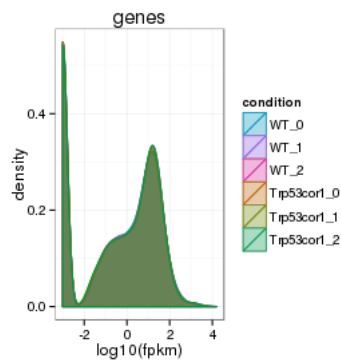

## Clustering

Replicate Clusters

### All genes(cuff)

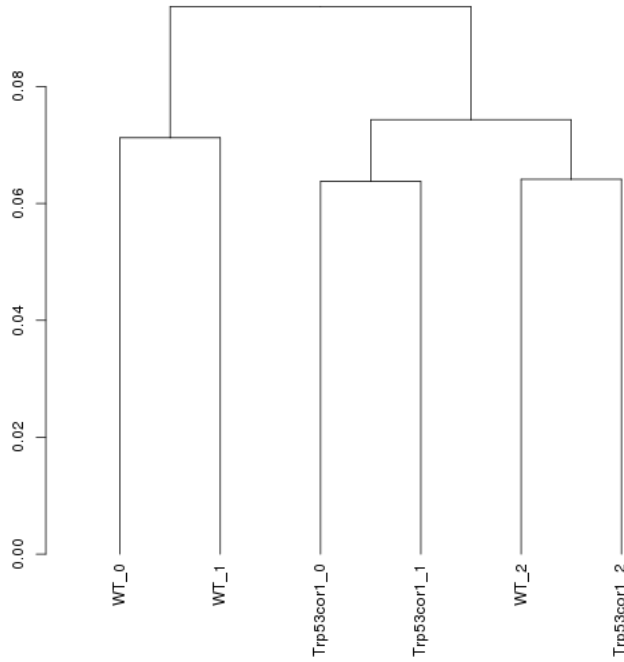

## NULL

### PCA (genes)

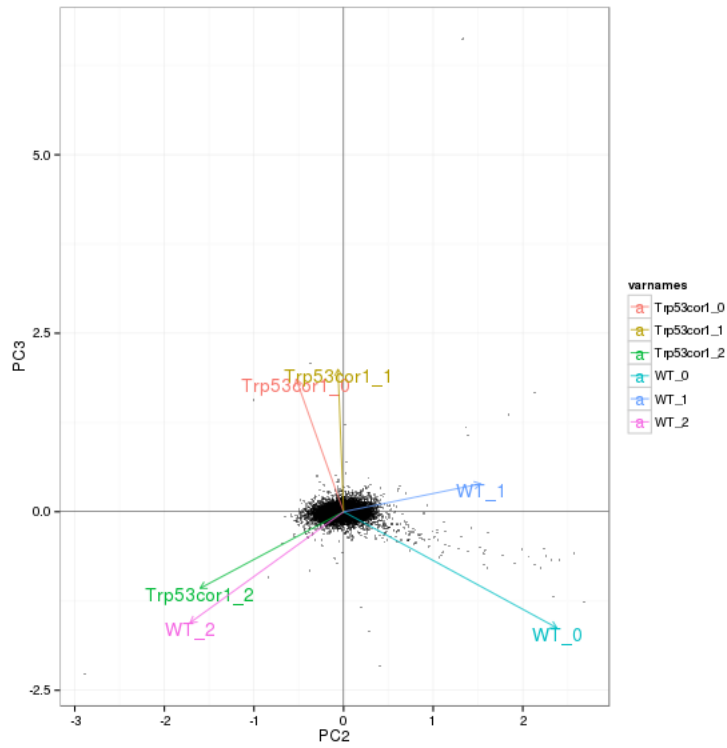

### MDS (genes)

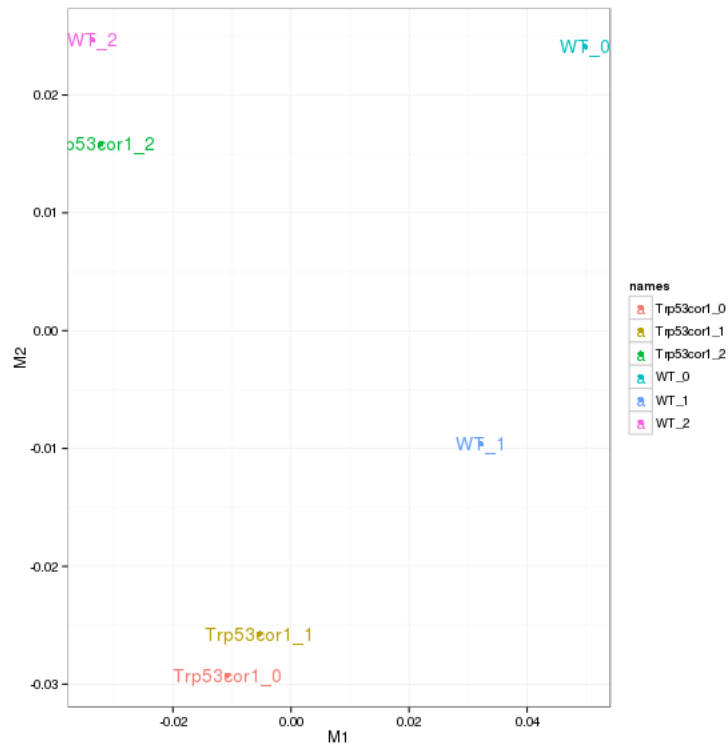

## KO assessment

### Endogenous IncRNA expression

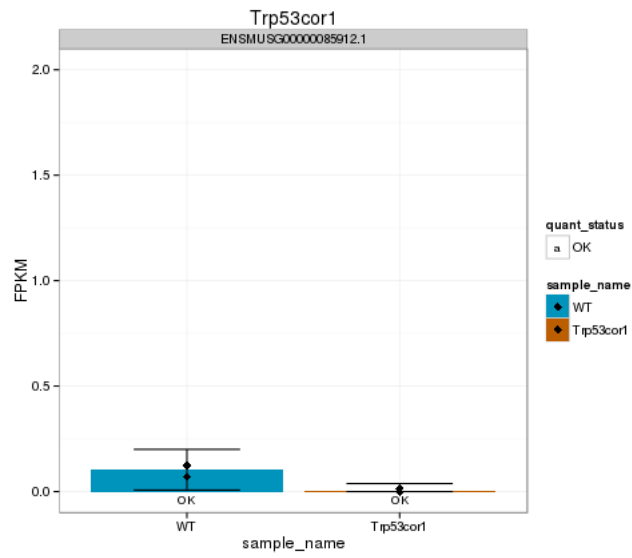



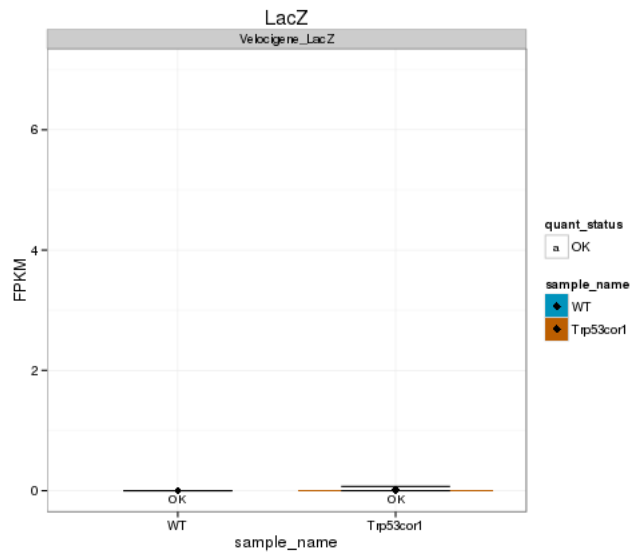

## Digital Genotyping (LacZ vs Endogenous lincRNA and Sex)

Eif2s3y is a y-expressed gene, Xist is an x-expressed gene Expression plot (endogenous linc, lacZ, Y-expressed gene):

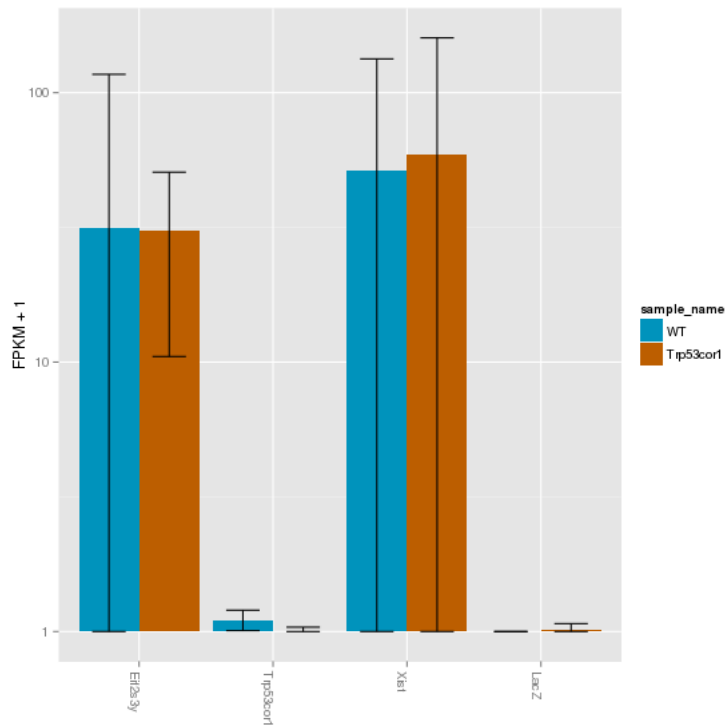

Expression heatmap:

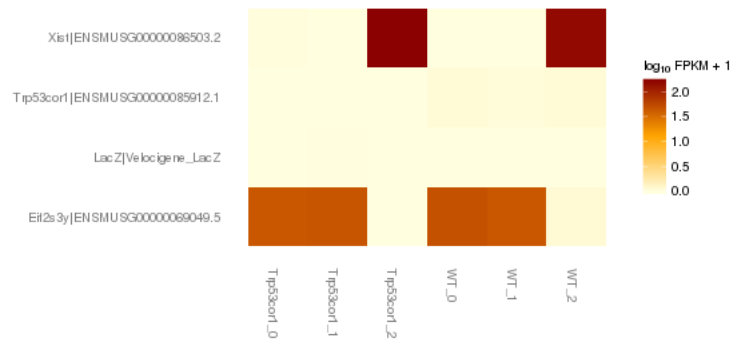

## Track visualization

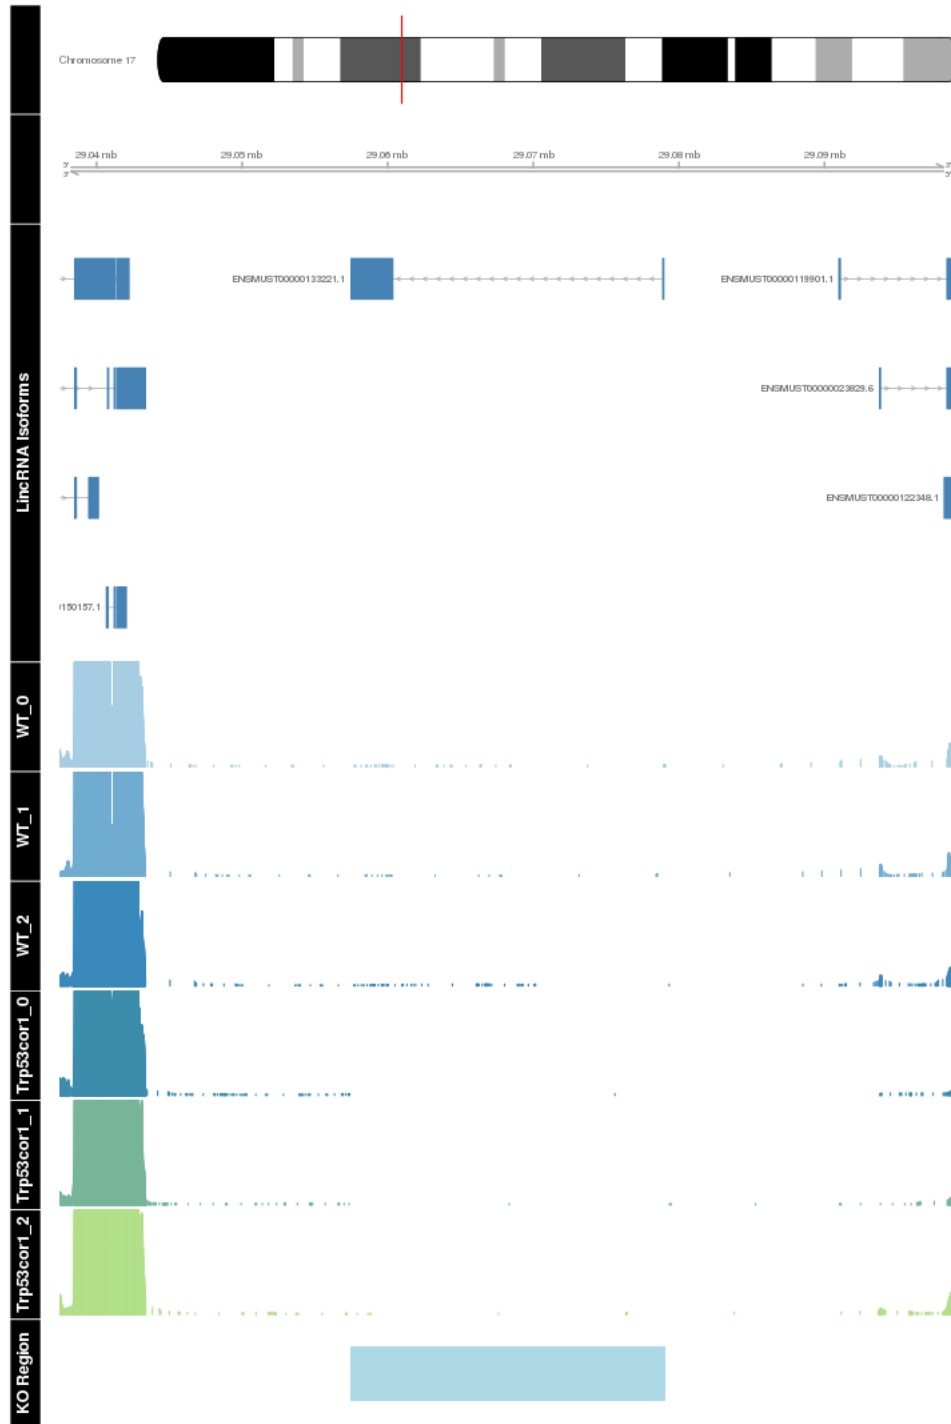

## Differential Analysis

### Differential Genes

There are 104 significantly differentially expressed genes. They are:

- | geneAnnot\$gene_short_name |
|----------------------------|
| 1 Mybp3                    |
| 2 Cd36                     |
| 3 Ctse                     |
| 4 Corin                    |
| 5 Hspb7                    |
| 6 Casq1                    |

7 Tcap  
8 Cacna2d2  
9 Aldh1a2  
10 Myl2  
11 Eef1a2  
12 Gpx3  
13 Myl7  
14 Pgam2  
15 Myh3  
16 Asb2  
17 Ryr2  
18 Cap2  
19 Ldb3  
20 Ppp1r1a  
21 Fgf12  
22 Prkdc  
23 Cdkn1a  
24 Polh  
25 Glo1  
26 Prss41  
27 Tpsab1  
28 Camk2a  
29 Ankrd1  
30 Cox8b  
31 Kihl30  
32 Tnnt2  
33 Tnni1  
34 Dpt  
35 Casq2  
36 Alb  
37 Bmp10  
38 Ckm  
39 Csrp3  
40 Itgb1bp2  
41 Mylk3  
42 Frad  
43 Tbx20  
44 Kcnj5  
45 Cryab  
46 Hcn4  
47 Mlip  
48 Snap91  
49 Dnah8  
50 Rnps1  
51 Art3  
52 Tnni3  
53 Krt17  
54 Aldh1b1  
55 Hspb2  
56 Rbm24  
57 Spon1  
58 Hand2  
59 Hrc  
60 Pcp411  
61 Rgs4  
62 Fsd2  
63 Synpo2l  
64 Strip2  
65 Txlnb

66 Sh3bgr  
67 Apobec2  
68 Myh6  
69 Smpx  
70 Obfc1  
71 Prss22  
72 Hmga1  
73 Cmya5  
74 Gm4737  
75 Mlf1  
76 Chchd10  
77 Tmem37  
78 Hspb3  
79 Tagap1  
80 Actn2  
81 Vsn1  
82 Afp  
83 Krt4  
84 Myl3  
85 Trim55  
86 Myl4  
87 Obscn  
88 Krt5  
89 Myl1  
90 Fabp4  
91 Cav3  
92 Zfp947  
93 mt-Nd3  
94 Myl9  
95 Actc1  
96 Bves  
97 Srp54a  
98 Gm10499  
99 Cox7a1  
100 Hmga1-rs1  
101 Sfta2  
102 Rps2-ps10  
103 Gm21857  
104 Gm9825

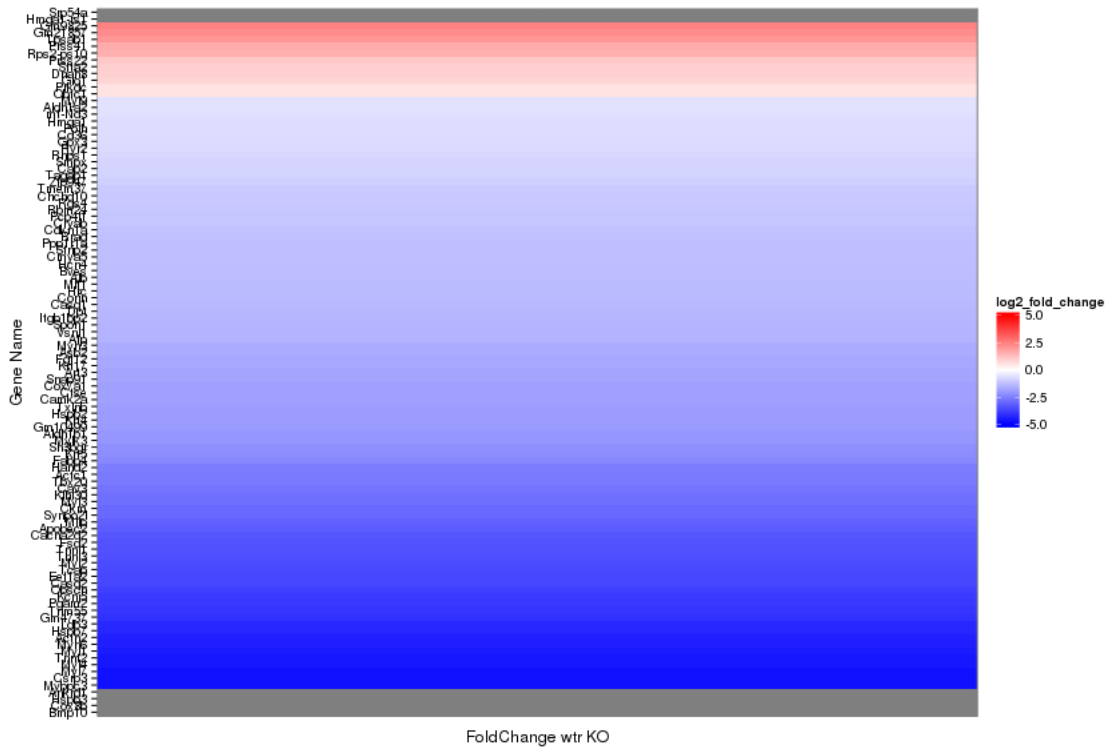

Expression heatmap of sigGenes

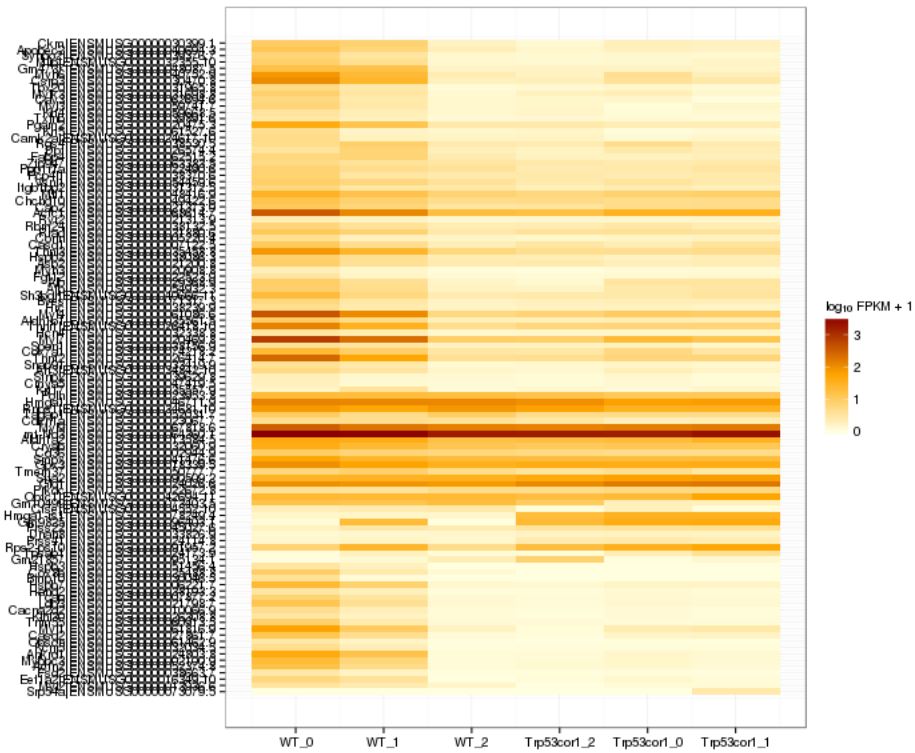

Foldchange heatmap of sigGenes

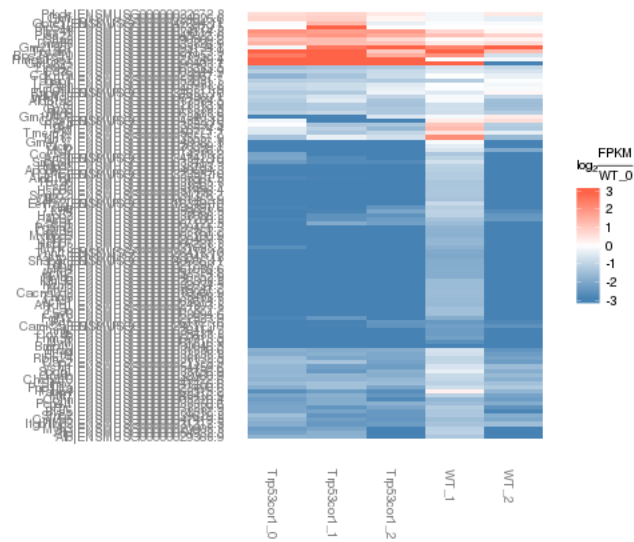

```
## Error in (function (classes, fdef, mtable) : unable to find an inherited method for function 'csFoldChangeHeatm
```

```
## Error in sqliteExecStatement(con, statement, bind.data): RS-DBI driver: (error in statement: near ")": syntax er
```

### Expression-level/significance relationship

Scatter plot of significant genes only:

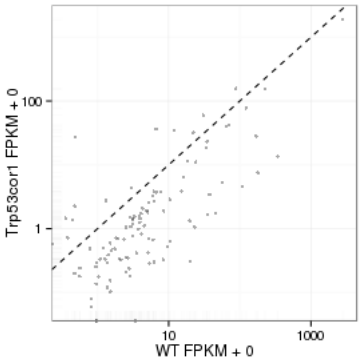

Volcano Plot

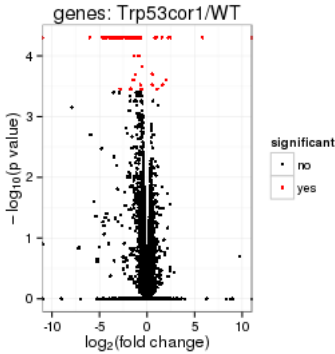

Volcano plot with significant genes only:

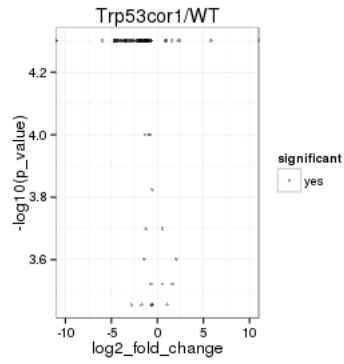

## Gene/Pathway Analysis

##

Enrichment and zscores are calculated based on expression in KO vs WT (fpmKO/fpmWT), so genes that are down regulated in KO are shown in blue, while upregulation is shown in red.

KO/WT Blue = down in KO Red = Up in KO

Biocarta enrichment:

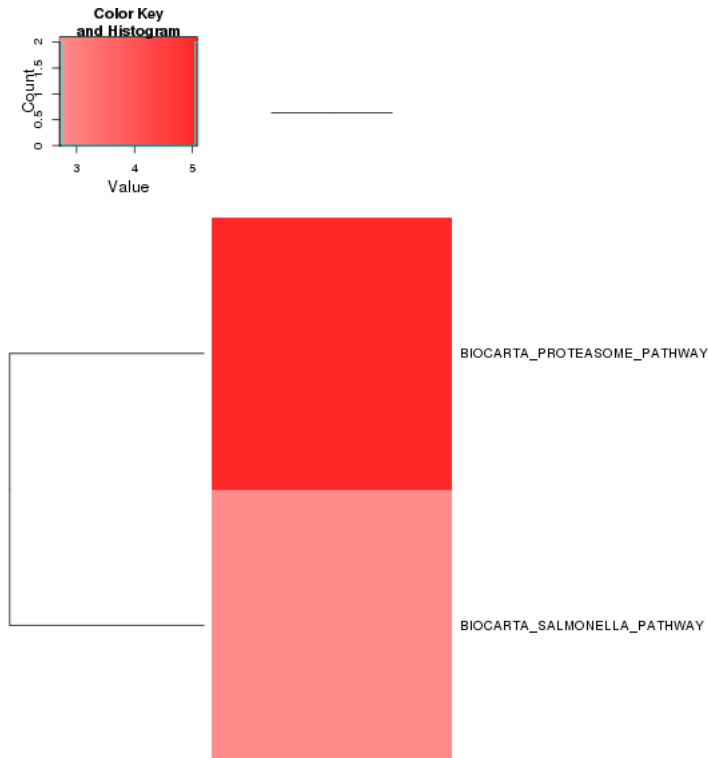

Biocarta zscore:



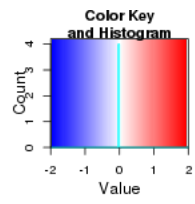

\_\_\_\_\_

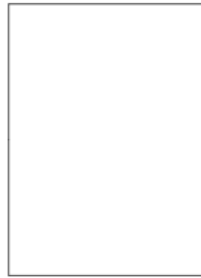

BIOCARTA\_SALMONELLA\_PATHWAY

BIOCARTA\_PROTEASOME\_PATHWAY

Reactome enrichment:

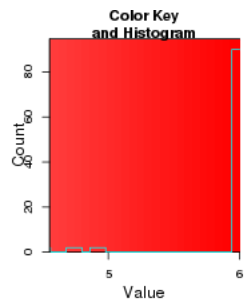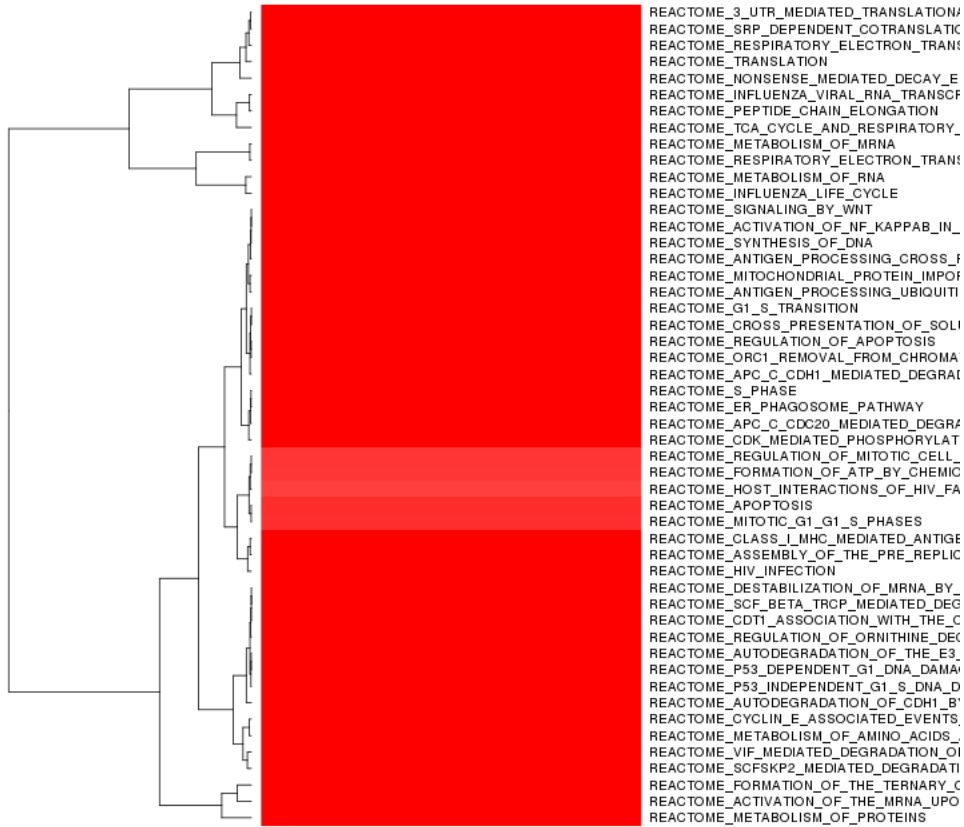

Reactome zscore:

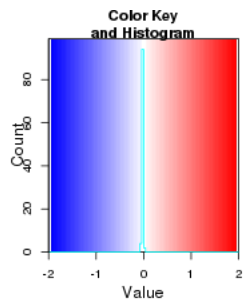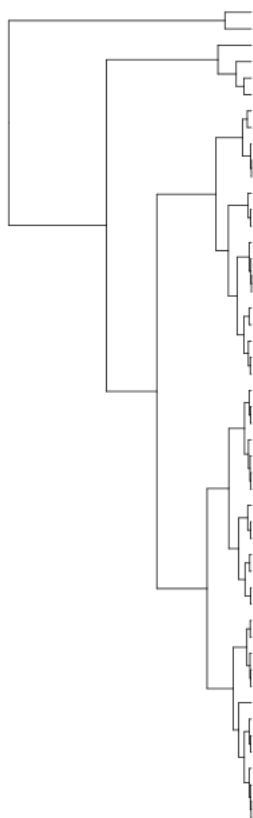

REACTOME\_COLLAGEN\_FORMATION  
 REACTOME\_SLC\_MEDIATED\_TRANSMEMBRAN  
 REACTOME\_TRANSLATION  
 REACTOME\_ACTIVATION\_OF\_THE\_MRNA\_UPO  
 REACTOME\_NONSENSE\_MEDIATED\_DECAY\_E  
 REACTOME\_SRP\_DEPENDENT\_COTRANSLATI  
 REACTOME\_S\_PHASE  
 REACTOME\_REGULATION\_OF\_MITOTIC\_CELL  
 REACTOME\_PYRUVATE\_METABOLISM\_AND\_CI  
 REACTOME\_SYNTHESIS\_OF\_DNA  
 REACTOME\_REGULATION\_OF\_MRNA\_STABILIT  
 REACTOME\_ANTIGEN\_PROCESSING\_UBIQUITI  
 REACTOME\_CLASS\_I\_MHC\_MEDIATED\_ANTIGE  
 REACTOME\_HIV\_INFECTION  
 REACTOME\_APOPTOSIS  
 REACTOME\_G1\_S\_TRANSITION  
 REACTOME\_METABOLISM\_OF\_AMINO\_ACIDS\_  
 REACTOME\_DOWNSTREAM\_SIGNALING\_EVEN  
 REACTOME\_CELL\_CYCLE\_CHECKPOINTS  
 REACTOME\_METABOLISM\_OF\_PROTEINS  
 REACTOME\_MITOTIC\_G1\_G1\_S\_PHASES  
 REACTOME\_SIGNALING\_BY\_THE\_B\_CELL\_REC  
 REACTOME\_HOST\_INTERACTIONS\_OF\_HIV\_FA  
 REACTOME\_METABOLISM\_OF\_RNA  
 REACTOME\_APC\_C\_CD20\_MEDIATED\_DEGR#  
 REACTOME\_SIGNALING\_BY\_WNT  
 REACTOME\_ASSEMBLY\_OF\_THE\_PRE\_REPLIC  
 REACTOME\_APC\_C\_CDH1\_MEDIATED\_DEGRAI  
 REACTOME\_ORC1\_REMOVAL\_FROM\_CHROMA  
 REACTOME\_ACTIVATION\_OF\_IF\_KAPPA\_B\_IN  
 REACTOME\_CITRIC\_ACID\_CYCLE\_TCA\_CYCLE  
 REACTOME\_ANTIGEN\_PROCESSING\_CROSS\_I  
 REACTOME\_REGULATION\_OF\_APOPTOSIS  
 REACTOME\_MITOCHONDRIAL\_PROTEIN\_IMPOI  
 REACTOME\_CYCLIN\_E\_ASSOCIATED\_EVENTS  
 REACTOME\_AUTODEGRADATION\_OF\_CDH1\_B'  
 REACTOME\_CDT1\_ASSOCIATION\_WITH\_THE\_C  
 REACTOME\_CDK\_MEDIATED\_PHOSPHORYLAT  
 REACTOME\_P53\_INDEPENDENT\_G1\_S\_DNA\_D  
 REACTOME\_METABOLISM\_OF\_MRNA  
 REACTOME\_CROSS\_PRESENTATION\_OF\_SOLI  
 REACTOME\_ER\_PHAGOSOME\_PATHWAY  
 REACTOME\_VIF\_MEDIATED\_DEGRADATION\_OI  
 REACTOME\_REGULATION\_OF\_ORNITHINE\_DEC  
 REACTOME\_SCF\_BETA\_TRCP\_MEDIATED\_DEG  
 REACTOME\_SCF\_SKP2\_MEDIATED\_DEGRADATI  
 REACTOME\_AUTODEGRADATION\_OF\_THE\_E3  
 REACTOME\_DESTABILIZATION\_OF\_MRNA\_BY\_  
 REACTOME\_INFLUENZA\_LIFE\_CYCLE  
 REACTOME\_P53\_DEPENDENT\_G1\_DNA\_DAMA#

Kegg enrichment:

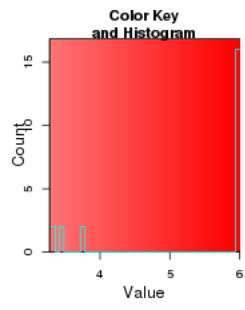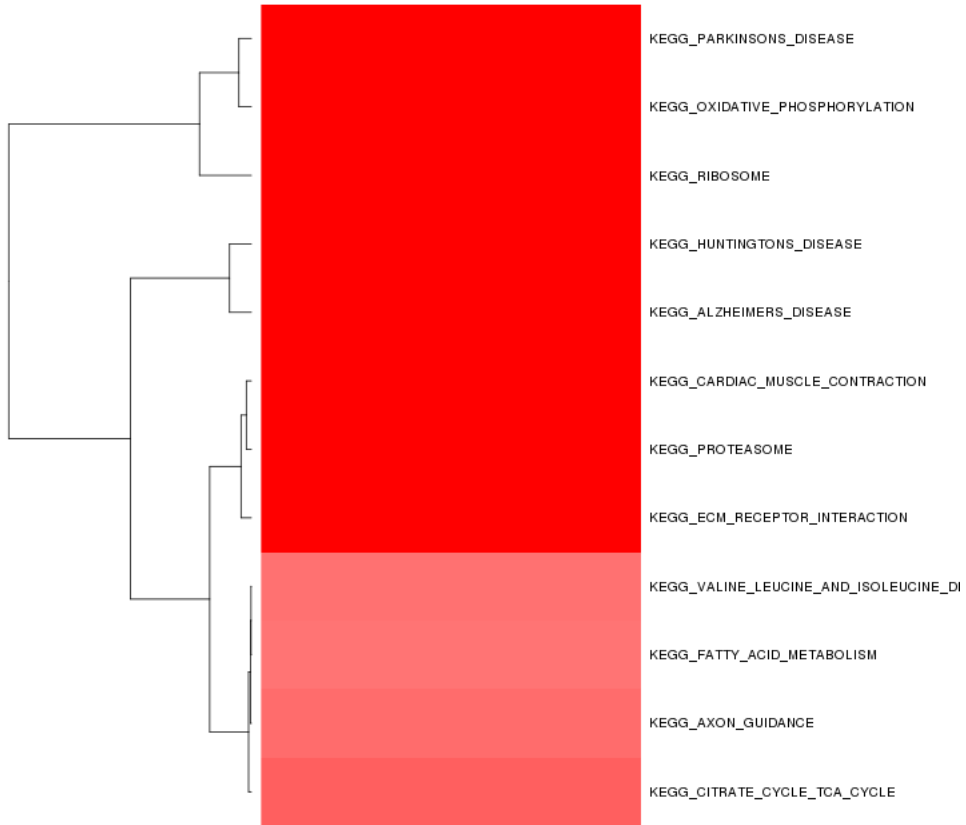

Kegg zscore:

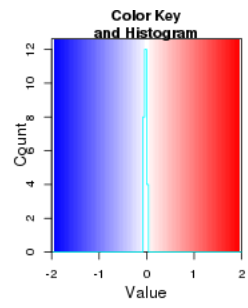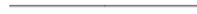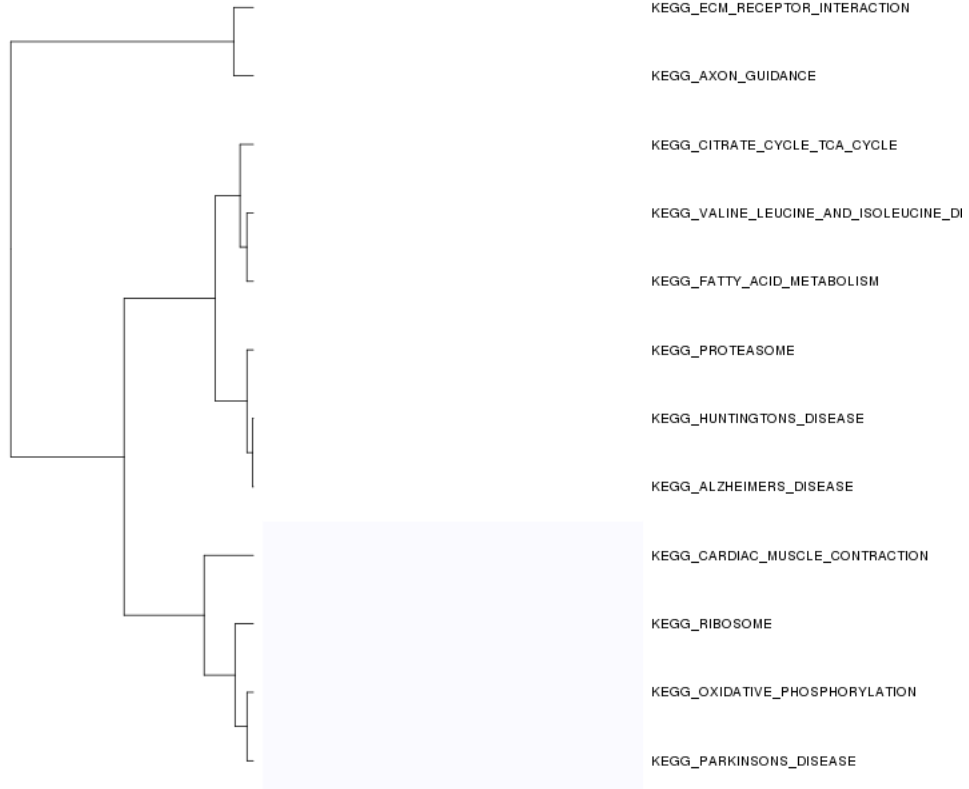

p53 enrichment:

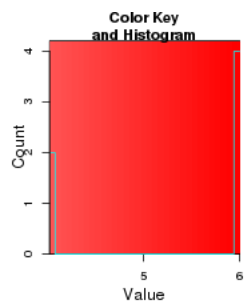

\_\_\_\_\_

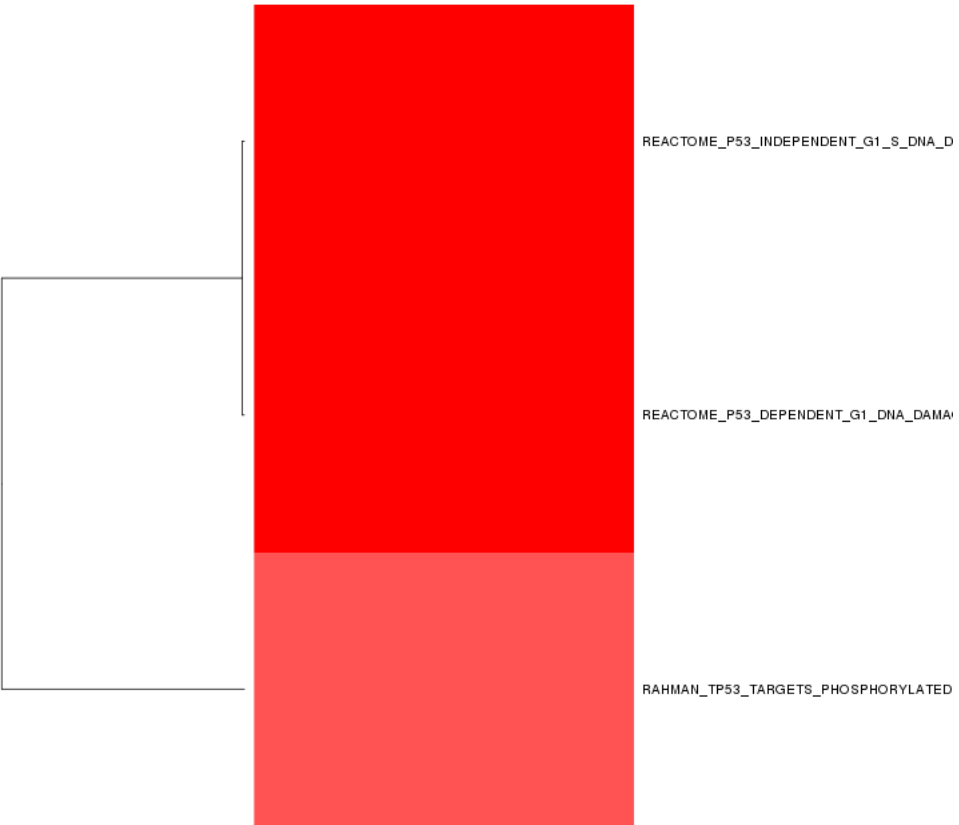

p53 zscore:

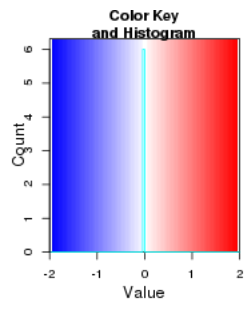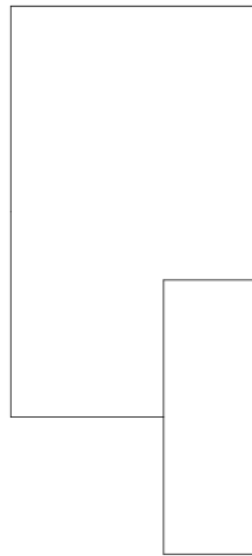

RAHMAN\_TP53\_TARGETS\_PHOSPHORYLATED

REACTOME\_P53\_INDEPENDENT\_G1\_S\_DNA\_D

REACTOME\_P53\_DEPENDENT\_G1\_DNA\_DAMN

Oncogene enrichment:

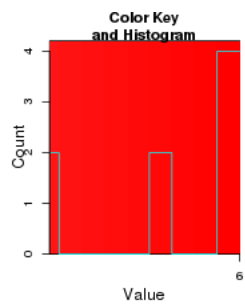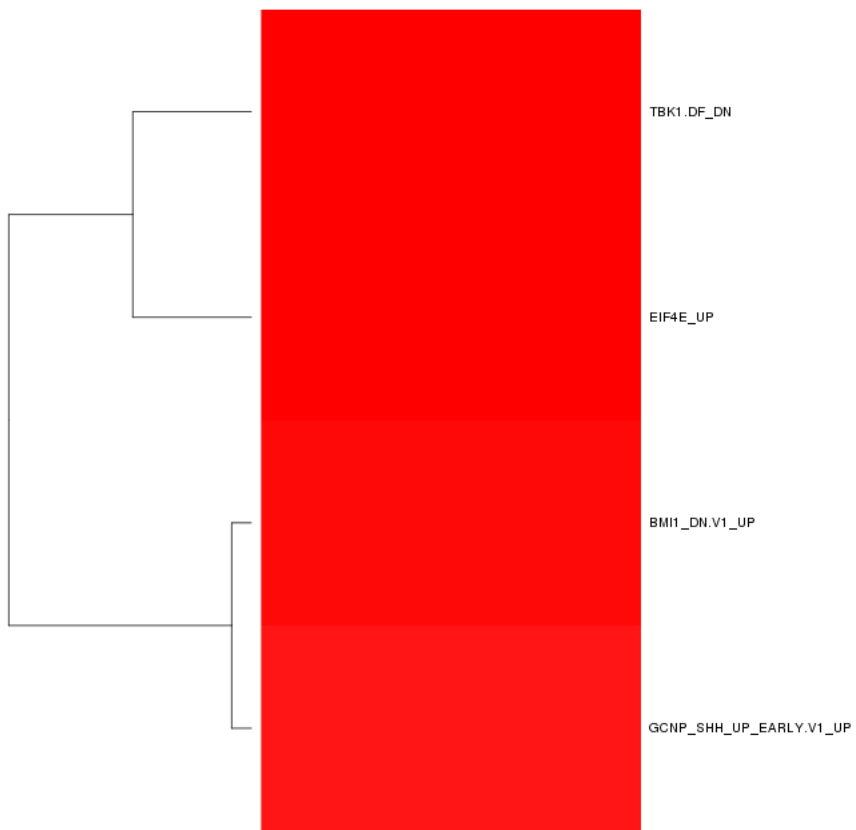

Oncogene zscore:



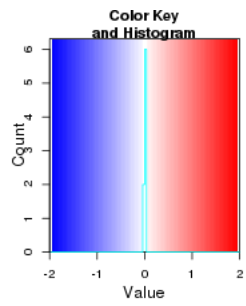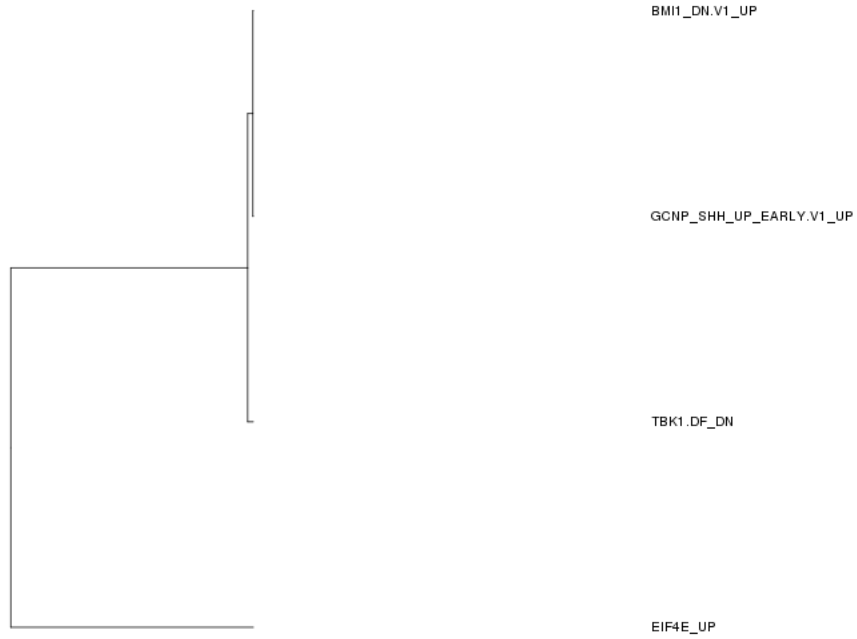

Jacks enrichment

```
## [1] "Not enough significant categories to print a heatmap!"
```

Jacks zscore

```
## [1] "Not enough significant categories to print a heatmap!"
```

## GO enrichment

Cluster profiler used to call enrichments of significantly differentially regulated genes that map to Entrez IDs.

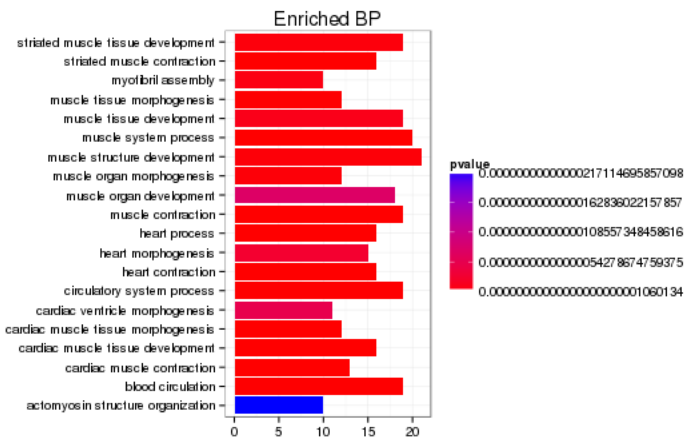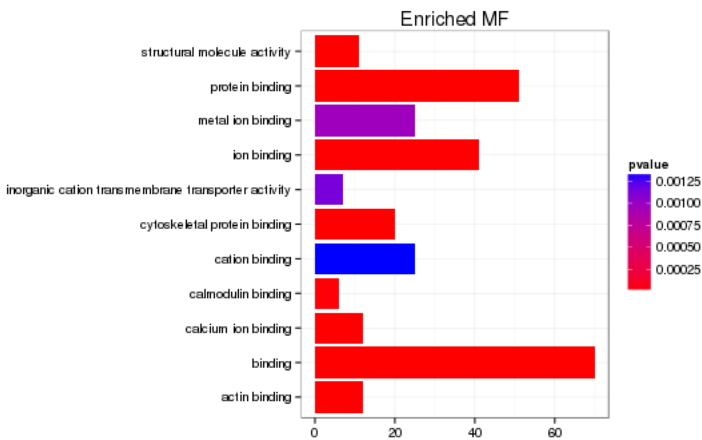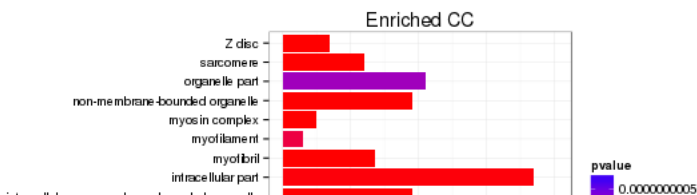



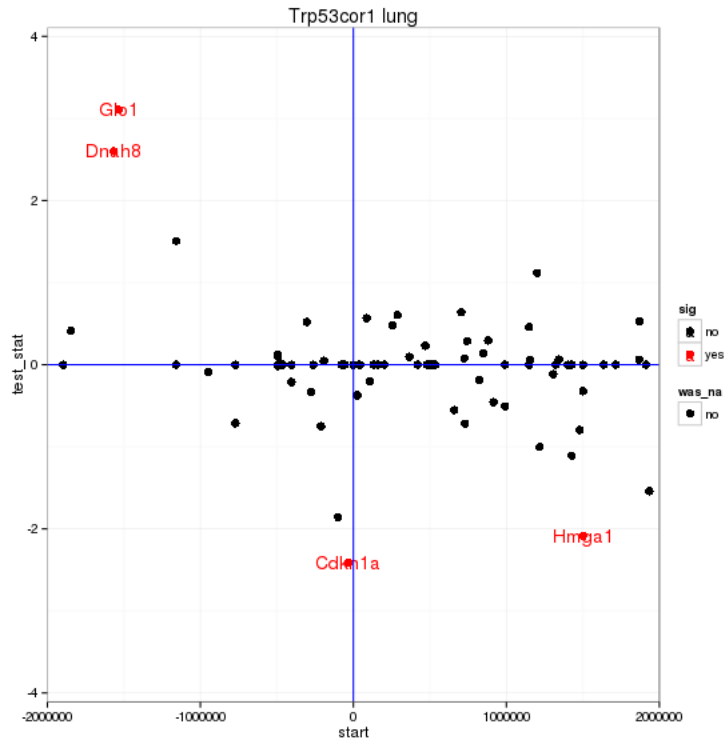

## Notes

### Samples used are:

11

- 1 lincp21\_Lung\_WT1
- 2 lincp21\_Lung\_WT2
- 3 lincp21\_Lung\_WT3
- 4 lincp21\_Lung\_KO1
- 5 lincp21\_Lung\_KO2
- 6 lincp21\_Lung\_KO3

## Replicates

| file                                                                                            | sample_name | replicate | rep_name    | total_mass  | norm_mass   |
|-------------------------------------------------------------------------------------------------|-------------|-----------|-------------|-------------|-------------|
| 1 /n/rinn_data1/users/agroff/seq/OtherMice/Diana/lincP21/quants/lincp21_Lung_WT1/abundances.cxb | WT          | 0         | WT_0        | 18941100.00 | 21186400.00 |
| 2 /n/rinn_data1/users/agroff/seq/OtherMice/Diana/lincP21/quants/lincp21_Lung_WT2/abundances.cxb | WT          | 1         | WT_1        | 21434800.00 | 21186400.00 |
| 3 /n/rinn_data1/users/agroff/seq/OtherMice/Diana/lincP21/quants/lincp21_Lung_WT3/abundances.cxb | WT          | 2         | WT_2        | 20217700.00 | 21186400.00 |
| 4 /n/rinn_data1/users/agroff/seq/OtherMice/Diana/lincP21/quants/lincp21_Lung_KO1/abundances.cxb | Trp53cor1   | 0         | Trp53cor1_0 | 19968300.00 | 21186400.00 |
| 5 /n/rinn_data1/users/agroff/seq/OtherMice/Diana/lincP21/quants/lincp21_Lung_KO2/abundances.cxb | Trp53cor1   | 1         | Trp53cor1_1 | 23883200.00 | 21186400.00 |
| 6 /n/rinn_data1/users/agroff/seq/OtherMice/Diana/lincP21/quants/lincp21_Lung_KO3/abundances.cxb | Trp53cor1   | 2         | Trp53cor1_2 | 23179700.00 | 21186400.00 |

## Session Info

```
## R version 3.0.2 (2013-09-25)
## Platform: x86_64-unknown-linux-gnu (64-bit)
##
## locale:
## [1] LC_CTYPE=en_US.UTF-8      LC_NUMERIC=C
## [3] LC_TIME=en_US.UTF-8      LC_COLLATE=en_US.UTF-8
## [5] LC_MONETARY=en_US.UTF-8  LC_MESSAGES=en_US.UTF-8
## [7] LC_PAPER=en_US.UTF-8     LC_NAME=C
## [9] LC_ADDRESS=C             LC_TELEPHONE=C
## [11] LC_MEASUREMENT=en_US.UTF-8 LC_IDENTIFICATION=C
##
```

```

## attached base packages:
## [1] grid      parallel  methods  stats    graphics grDevices utils
## [8] datasets  base
##
## other attached packages:
## [1] plyr_1.8.1
## [2] stringr_0.6.2
## [3] seqbias_1.10.0
## [4] BSgenome.Mmusculus.UCSC.mm10_1.3.19
## [5] BSgenome_1.30.0
## [6] Biostrings_2.30.1
## [7] GO.db_2.10.1
## [8] org.Mm.eg.db_2.10.1
## [9] clusterProfiler_1.13.1
## [10] DOSE_2.0.0
## [11] ReactomePA_1.6.1
## [12] AnnotationDbi_1.24.0
## [13] Biobase_2.22.0
## [14] mgcv_1.8-2
## [15] nlme_3.1-117
## [16] RMySQL_0.9-3
## [17] RColorBrewer_1.0-5
## [18] gridExtra_0.9.1
## [19] gtable_0.1.2
## [20] marray_1.40.0
## [21] gplots_2.14.2
## [22] GSA_1.03
## [23] limma_3.18.13
## [24] xtable_1.7-3
## [25] cummeRbund_2.7.2
## [26] Gviz_1.6.0
## [27] rtracklayer_1.22.7
## [28] GenomicRanges_1.14.4
## [29] XVector_0.2.0
## [30] IRanges_1.20.7
## [31] fastcluster_1.1.13
## [32] reshape2_1.4
## [33] ggplot2_1.0.0
## [34] RSQLite_0.11.4
## [35] DBI_0.3.1
## [36] BiocGenerics_0.8.0
## [37] knitr_1.7
##
## loaded via a namespace (and not attached):
## [1] biomart_2.18.0      biovizBase_1.10.8    bitops_1.0-6
## [4] caTools_1.17.1     cluster_1.15.2       colorspace_1.2-4
## [7] dichromat_2.0-0    digest_0.6.4         DO.db_2.7
## [10] evaluate_0.5.5     formatR_1.0          Formula_1.1-2
## [13] gdata_2.13.3       GenomicFeatures_1.14.5 GOsemSim_1.20.3
## [16] graph_1.40.1       graphite_1.8.1       gtools_3.4.1
## [19] Hmisc_3.14-4       igraph_0.7.1         KEGG.db_2.10.1
## [22] KernSmooth_2.23-12 labeling_0.2          lattice_0.20-29
## [25] latticeExtra_0.6-26 MASS_7.3-33          Matrix_1.1-4
## [28] munsell_0.4.2      org.Hs.eg.db_2.10.1  proto_0.3-10
## [31] qvalue_1.36.0      Rcpp_0.11.3          RCurl_1.95-4.3
## [34] reactome.db_1.46.1 Rsamtools_1.14.3     scales_0.2.4
## [37] splines_3.0.2      stats4_3.0.2         survival_2.37-7
## [40] tcltk_3.0.2        tools_3.0.2          XML_3.98-1.1
## [43] zlibbioc_1.8.0

```

## Run Info

```
##          param
## 1      cmd_line
## 2          version
## 3  SVN_revision
## 4  boost_version
## 5          genome
##
## 1 cuffdiff -p 10 -L WT,Trp53cor1 -o /n/rinn_data1/users/agroff/seq/OtherMice/Diana/lincP21/diff/Trp53cor1_E14.5_
## 2
## 3
## 4
## 5
```
